# Supplementary material
Source: PubMed Central journal article supplement (PMC3714010)
Supplement: NIHMS470697-supplement-01.pdf [file NIHMS470697-supplement-01.pdf]

# THE LANCET

## **Supplementary appendix**

This appendix formed part of the original submission and has been peer reviewed. We post it as supplied by the authors.

Supplement to: Cross-Disorder Group of the Psychiatric Genomics Consortium. Identification of risk loci with shared effects on five major psychiatric disorders: a genome-wide analysis. *Lancet* 2013; published online Feb 28. [http://dx.doi.org/10.1016/S0140-6736\(12\)62129-1](http://dx.doi.org/10.1016/S0140-6736(12)62129-1).

## Supplemental Material

### Supplemental Methods

- I. QC and Analysis Pipeline
- II. Figure S1: Overlap of cases and controls from contributing datasets
- III. Figure S2: First Two Principal Components of Ancestry
- IV. Cross-Disorder Modeling Analysis
  - a. Table S1: Cross-Disorder Risk Models
- V. Polygene Scoring Analysis
- VI. Pathway Analysis Methods
- VII. eQTL Enrichment Analysis

### Supplemental Results

- VIII. Figure S3: Quantile-Quantile plot for the primary 5 disorder meta-analysis
- IX. Table S2: Five disorder meta-analysis results for regions with  $p < 10^{-5}$ .
- X. Figure S4: Regional Plots for loci with  $p < 10^{-6}$
- XI. Table S3: Modeling analysis results for SNPs in regions with a meta analysis  $p < 1 \times 10^{-6}$
- XII. Table S4: Association analysis results for top SNPs from the 5 degree of freedom test  $p < 1 \times 10^{-5}$
- XIII. Figure S5: BIC/AIC results for the top meta analysis SNPs
- XIV. Figures S6, S7: BIC/AIC results and Forest Plots for SNPs Associated with BPD or SCZ in Prior PGC Analyses
- XV. Table S5: Polygenic Risk Profiling Results.
- XVI. Figure S8: Polygenic Risk Profiling for Combined Discovery Sets
- XVII. Table S6: Top 50 Pathway Analysis Results
- XVIII. Table S7: Calcium Channel Activity Gene Set Results
- XIX. Table S8: List Of 73 Genes Included In Calcium Channel Activity Gene Set.
- XX. Figure S9: Functional relationships among 21 calcium channel activity genes that showed significant association with 5 disorders at  $p < 10^{-3}$  in the primary meta analysis (evidence view in the STRING database)
- XXI. Figure S10: Functional relationship between 21 calcium channel activity genes that showed significant association with 5 disorders at  $p < 10^{-3}$  in the primary meta analysis (significance view in the STRING database)
- XXII. Figure S11: Functional relationships between 73 calcium channel activity genes defined by Gene Ontology (GO:0005262 - evidence view in the STRING database)
- XXIII. Figure S12: Functional relationships between 73 calcium channel activity genes defined by Gene Ontology (GO:0005262 - significance view in the STRING database)
- XXIV. Table S9. Detailed functional association score from the STRING database between 21 calcium channel activity genes
- XXV. Table S10. Detailed functional association score from the STRING database for 73 calcium channel activity genes (GO:0005262)

## I. Quality Control and Analysis Pipeline

Briefly, SNPs were initially removed for missingness  $> 5\%$  within each study, followed by removal of individuals with genotype missingness exceeding  $2\%$ . Remaining SNPs with missing rates  $> 2\%$  were then removed as were SNPs with case-control difference in missingness  $> 2\%$ . Finally, we also removed SNPs with allele frequency difference  $> 15\%$  compared to HapMap CEU population or for which Hardy-Weinberg equilibrium  $p < 10^{-6}$  among controls. Pictures of the first two principal components can be found in Figure S1. Genetic quality control included relatedness testing and principal components analyses. Relatedness testing was done with PLINK (see URLs), reporting pairs with genome identity ( $\hat{\pi}$ )  $> 0.9$  as 'identical samples' and with  $\hat{\pi} > 0.2$  as being closely related. After random shuffling, one ID from each pair was excluded from downstream analysis. From groups with multiple related pairs (for example, a family or multiple use of NIMH controls), only one individual was kept. For the family-based samples, we recoded any Mendelian error as missing and checked the parent-offspring relationships via identity-by-state. For all pairs of samples included in the analysis, we estimated the IBD relationship using PLINK.<sup>1</sup> This enabled us to identify relatives and sample duplicates across the entire dataset, so as to prevent the increase in false positives and overdispersion of the combined test statistic that would result from violating the assumptions of independence. Siblings in family based samples were retained.

For meta-analysis of case control samples, the Z-score is generated by regressing phenotype on the dosage of the genotype, including seven multi-

dimensional scaling (MDS) dimensions as covariates.<sup>2</sup> For the family-based samples, we applied a case-pseudocontrol approach by using the non-transmitted alleles at each position as the control for each case. Families with more than one offspring were broken into independent trios with each affected appearing as the offspring of an 'independent' trio with parental genotypes replicated. We ran logistic regression analysis on the cases and pseudo-controls without the MDS as the transmitted and non-transmitted haplotypes come from the same population.

Using Beagle 3.0.4,<sup>3</sup> we performed imputation within each study in batches of 300 randomly drawn individuals in order to keep the same case-control ratio as in the total sample from that study. As a reference panel, we used the CEU+TSI Hapmap Phase 3 data with 410 phased haplotypes encompassing 1,252,901 SNPs.

## **II. Figure S1: Overlap of cases and controls from contributing datasets**

Overlapping or related cases (top) and controls (bottom) are shown as connecting lines between

samples.

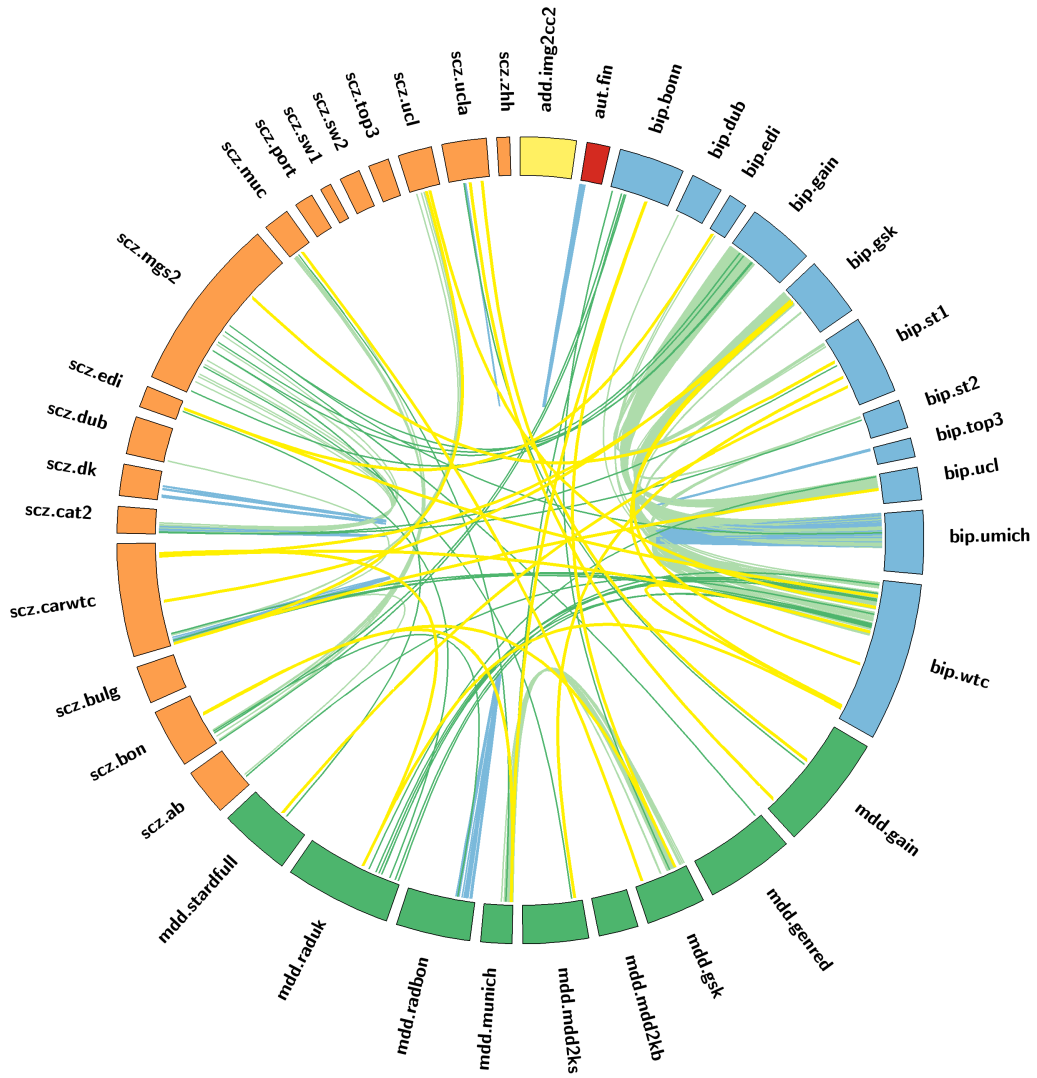

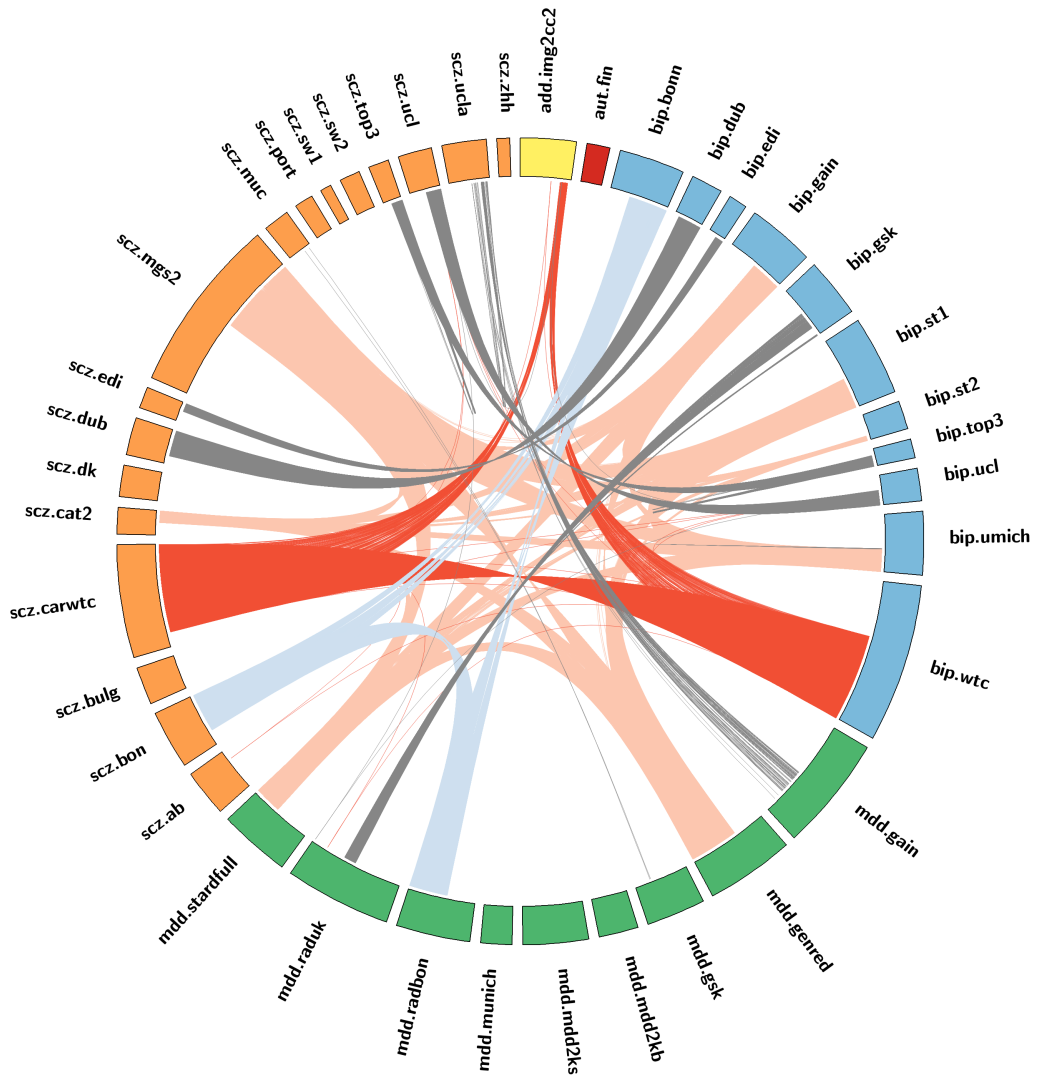

### III. Supplementary Figure S2: Multidimensional scaling plot of identity-by-state distances: Plot of first two MDS components by sample.

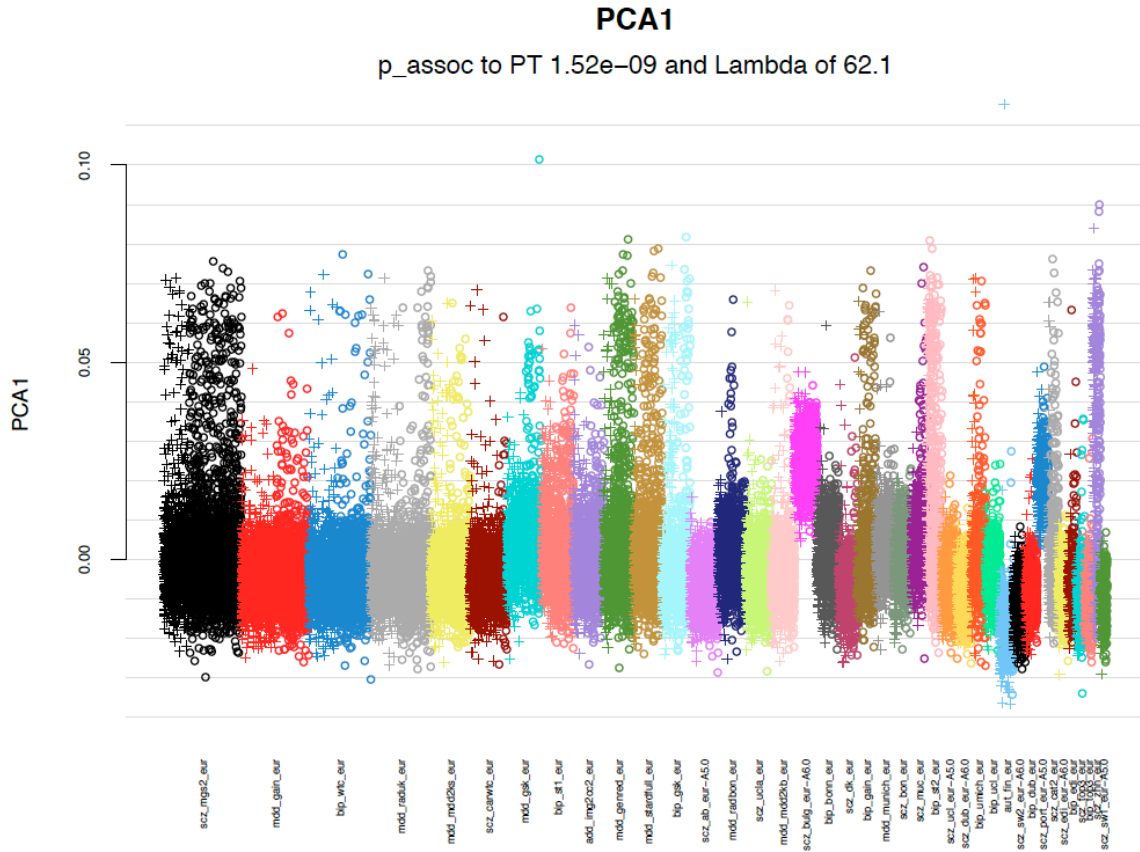

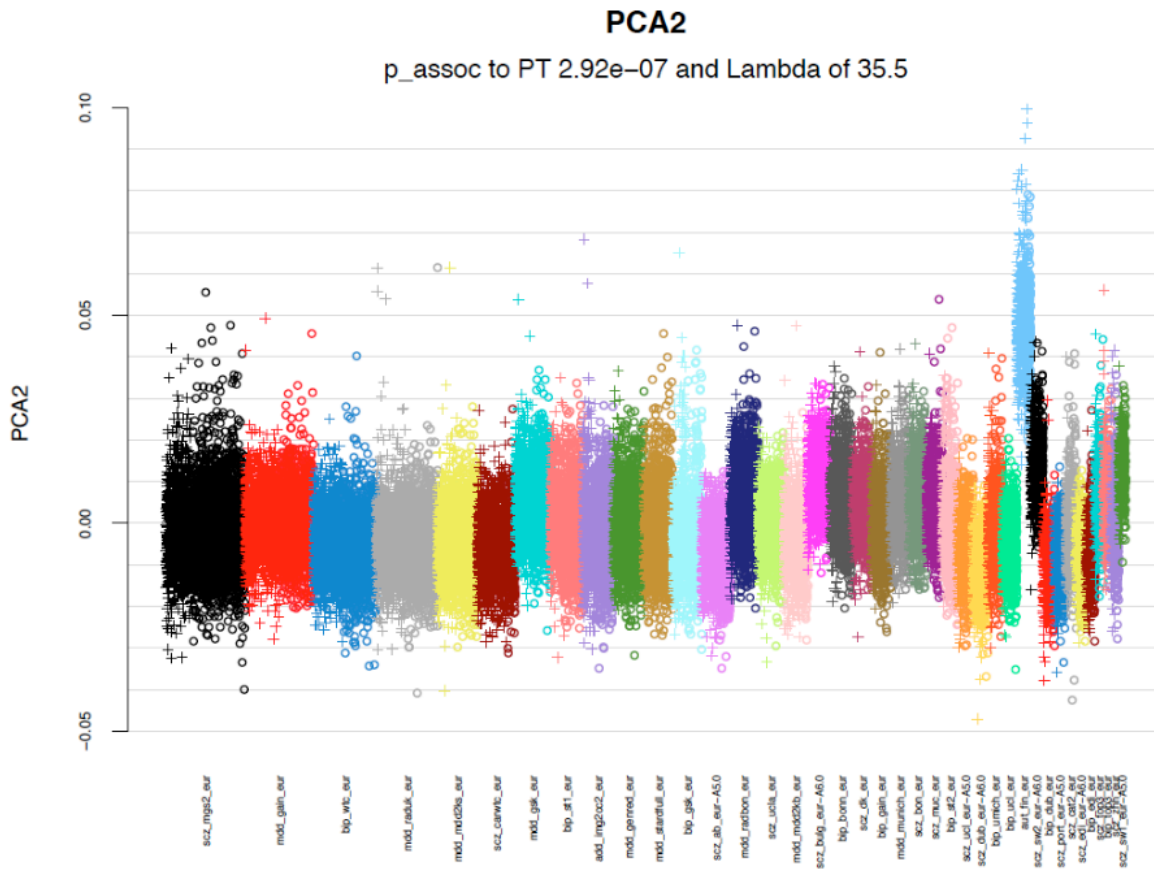

#### IV. Cross-Disorder Modeling Analysis

To characterize the specificity of allelic effects for loci demonstrating association in the primary meta analyses or 5 d.f. meta-analysis, and for loci associated with BPD or SCZ in recent disorder-specific PGC meta-analyses<sup>4,5</sup>, we applied a model selection approach as previously described.<sup>6,7</sup> In brief, this approach involves a single genomewide omnibus test of association across disorders followed by a model selection approach that asks which configuration of



phenotypes is most likely to be associated with a given variant. The omnibus test consists of a single likelihood ratio test computed from a multinomial logistic regression in which allele frequencies at a given SNP can vary for each case-control disorder group compared to a null model in which allele frequencies are the same across all disorder groups. This is essentially a test of whether there is any association between the SNP and any of the five target disorders, but minimizes the experiment-wise Type I error rate compared to the alternative of testing all possible subsets of disorders. As shown by Lee et al. <sup>6</sup>, the omnibus test has equivalent or greater power compared to individual tests of disorder subsets.

The omnibus test is followed by fitting log-linear or multinomial logistic regression models corresponding to a range of causal models that characterize the effect of a given allele on one or more of the target disorders. These models specify risk effect configurations that vary or are constrained to be equal among subsets of the disorders. Then the best-fitting model is identified according to two commonly used information criteria: the Bayesian Information Criterion (BIC) or the Akaike Information Criterion (AIC). The model with the lowest BIC (and/or AIC) is selected as the best-fit model. The use of these information criteria allows comparison of non-nested models.

In the present analysis, we modified this approach as follows. First, because our primary analysis consisted of the single five-disorder meta-analysis, we do not additionally report the results of the omnibus test. Second, for the model-fitting procedure, we relied on prior epidemiologic and genetic evidence of disorder relationships to predefine a set of causal models for comparison rather than

considering all possible models. Third, the best-fit model results we present are based on the BIC criterion. Finally, we do not predict the best model if the information criterion measure differences do not differ significantly between the best-fit model and the second-best-fit model. As suggested in [8], we use the absolute score difference of greater than two as the significant superiority of the best model fitness compared to the others. We acknowledge that alternative best-fit models might be selected by use of the AIC or other criteria.

Specifically, we defined 13 cross-disorder risk models corresponding to the following 13 patterns of allele frequency configurations across attention deficit hyperactivity disorder (ADHD), autism spectrum disorder (ASD), bipolar disorder (BP), major depressive disorder (MDD), schizophrenia (SCZ), and control (CTRL) subject groups: 1) *ADHD specific* risk (ADHD  $\neq$  [ASD=BP=MDD=SCZ=CTRL]); 2) *ASD specific* risk (ASD  $\neq$  [ADHD=BP=MDD=SCZ=CTRL]); 3) *BP specific* risk (BP  $\neq$  [ADHD=ASD=MDD=SCZ=CTRL]); 4) *MDD specific* risk (MDD  $\neq$  [ADHD=ASD=BP=SCZ=CTRL]); 5) *SCZ specific* risk (SCZ  $\neq$  [ADHD=ASD=BP=MDD=CTRL]); 6) *shared BP and MDD* risk ([BP=MDD]  $\neq$  [ADHD=ASD=SCZ=CTRL]); 7) *shared BP and SCZ* ([BP=SCZ]  $\neq$  [ADHD=ASD=MDD=CTRL]); 8) *shared MDD and SCZ* ([MDD=SCZ]  $\neq$  [ADHD=ASD=BP=CTRL]); 9) *shared ADHD and BP* ([ADHD=BP]  $\neq$  [ASD=MDD=SCZ=CTRL]); 10) *shared ASD and SCZ* ([ASD=SCZ]  $\neq$  [ADHD=BP=MDD=CTRL]); 11) *shared ADHD and ASD* ([ADHD=ASD]  $\neq$  [BP=MDD=SCZ=CTRL]); 12) *shared BP, MDD and SCZ* ([BP=MDD=SCZ]  $\neq$  [ADHD=ASD=CTRL]); 13) *risk shared by all 5 disorders* ([ADHD=ASD=BP=MDD=SCZ]  $\neq$  [CTRL]). Table S3 summarizes the parameters that

were fit for the 13 risk models. We selected the best-fit model among 13 based on the Bayesian information criterion (BIC) [2]. The selected model indicates the pleiotropic disorder model(s) providing the best fit for genotype-phenotype association for a given variant. Tables S4-S5 summarize the modeling analysis results for the top SNPs from the primary meta-analyses and the 5 degree of freedom tests, respectively. Supplementary Figures S4, S5, and S6 show the BIC scores of 13 cross-disorder models of the examined SNPs for the primary meta-analyses and top BP and SCZ PGC GWAS analyses.

**TABLE S1. Cross disorder risk models**

| Category                  | Model         | Risk Effect Parameter Setting |            |            |            |              | Control    |
|---------------------------|---------------|-------------------------------|------------|------------|------------|--------------|------------|
|                           |               | ADHD                          | ASD        | BP         | MDD        | SCZ          |            |
| One Disorder Risk Model   | ADHD          | $\alpha_1$                    | $\alpha_0$ | $\alpha_0$ | $\alpha_0$ | $\alpha_0$   | $\alpha_0$ |
|                           | ASD           | $\alpha_0$                    | $\alpha_1$ | $\alpha_0$ | $\alpha_0$ | $\alpha_0$   | $\alpha_0$ |
|                           | BP            | $\alpha_0$                    | $\alpha_0$ | $\alpha_1$ | $\alpha_0$ | $\alpha_0$   | $\alpha_0$ |
|                           | MDD           | $\alpha_0$                    | $\alpha_0$ | $\alpha_0$ | $\alpha_1$ | $\alpha_0$   | $\alpha_0$ |
|                           | SCZ           | $\alpha_0$                    | $\alpha_0$ | $\alpha_0$ | $\alpha_0$ | $\alpha_1$   | $\alpha_0$ |
| Two Disorder Risk Model   | BP & MDD      | $\alpha_0$                    | $\alpha_0$ | $\alpha_1$ | $\alpha_1$ | $\alpha_0$   | $\alpha_0$ |
|                           | BP & SCZ      | $\alpha_0$                    | $\alpha_0$ | $\alpha_1$ | $\alpha_0$ | $\alpha_1$   | $\alpha_0$ |
|                           | MDD & SCZ     | $\alpha_0$                    | $\alpha_0$ | $\alpha_0$ | $\alpha_1$ | $\alpha_1$   | $\alpha_0$ |
|                           | ADHD & BP     | $\alpha_1$                    | $\alpha_0$ | $\alpha_1$ | $\alpha_0$ | $\alpha_0$   | $\alpha_0$ |
|                           | ASD & SCZ     | $\alpha_0$                    | $\alpha_1$ | $\alpha_0$ | $\alpha_0$ | $\alpha_1$   | $\alpha_0$ |
| Three Disorder Risk Model | ADHD & ASD    | $\alpha_1$                    | $\alpha_1$ | $\alpha_0$ | $\alpha_0$ | $\alpha_0$   | $\alpha_0$ |
|                           | BP, MDD & SCZ | $\alpha_0$                    | $\alpha_0$ | $\alpha_1$ | $\alpha_1$ | $\alpha_1$   | $\alpha_0$ |
| All Disorder Risk Model   | 5 Disorder    | $\alpha_1$                    | $\alpha_1$ | $\alpha_1$ | $\alpha_1$ | $\alpha_1$   | $\alpha_0$ |
|                           |               | $\alpha_1$                    | $\beta_1$  | $\gamma_1$ | $\delta_1$ | $\epsilon_1$ | $\alpha_0$ |

\* For each of five disorder groups and one control subject group, risk effect parameters are estimated from multinomial logistic regression. The same parameter setting across different groups constrains the same risk effect estimates for the corresponding disorder groups

## V. Polygenic Risk Score Profile Analysis

We used risk score profiling to examine the aggregate polygenic sharing of allelic effects between pairs of disorders. For each of these pairs we defined one disorder in each pair as a "training" dataset and a second disorder as "target" dataset. We selected a filtered set of SNPs from the training results using "clumping". We first made a subset containing SNPs that met the following criteria: not AT or CG genotypes, minor allele frequency > 0.02, and imputation INFO score > 0.9. We then applied the --clump algorithm in PLINK with options: --clump-p1 1 --clump-p2 1 --clump-r2 0.25 --clump-kb 500. With these setting, SNPs with  $r^2 < 0.25$  within 500 kb windows were retained, while filtering for the highest significance levels within linkage disequilibrium blocks. Due to the strong signal and high linkage disequilibrium in the MHC, only one SNP was kept from the extended MHC region.

We used PLINK's --score function to calculate the individual scores of the target set. To account for population stratification, the training analysis in the PGC data used the usual logistic regression framework including study indicator and significant MDS scores. In the target set, we estimated the variance explained in disease state by the difference in the Nagelkerke pseudo  $R^2$  of an analysis including the score and covariates such as site and ancestry principal component scores vs. an analysis with the covariates alone. The significance level for each analysis was estimated via classical logistic regression analysis. From the full set of filtered SNPs, we evaluated 10 different association P thresholds ( $P_T$ ): 0.0001, 0.001, 0.01, 0.05, 0.1, 0.2, 0.3, 0.4, 0.5, and 1.0 (i.e., including all SNPs).

## VI. Pathway Analysis Methods

We examined enrichment of specific bio-molecular functions in which the top associated genes from the primary meta-analysis are commonly involved. This analysis used a collection of Gene Ontology (GO) terms and a set-based association test implemented in the INRICH software (<http://atgu.mgh.harvard.edu/inrich>).<sup>8</sup> First, we downloaded a collection of 14,793 Gene Ontology (GO) terms from the gene ontology consortium web site (<http://www.geneontology.org/>).<sup>9</sup> This GO gene set defines groups of biologically related genes in terms of their involvement in the same biological processes, cellular components and molecular functions, supported by diverse experimental and computational analysis evidence ([www.geneontology.org/GO.evidence.shtml](http://www.geneontology.org/GO.evidence.shtml)). Of 14,793 total GO terms, we restricted the analysis to terms with at least 5 human genes and not more than 200, leaving 6,600 GO terms (i.e., gene sets). Second, we obtained the gene2go dataset from NCBI (<ftp.ncbi.nlm.nih.gov/gene/DATA/gene2go.gz>) and mapped the Ensembl gene identifiers to gene symbols. We also downloaded a list of 26,914 human gene transcripts (hg18) from the UCSC Genome Browser database (<http://genome.ucsc.edu/>). Third, linkage-disequilibrium (LD)-based clumping was conducted to generate LD-independent association regions from the primary meta-analysis results using PLINK.<sup>1</sup> By applying a  $p$  value threshold of  $1 \times 10^{-3}$ , 874 LD-independent genomic intervals were defined (clumping kb=1000; gene-border 35kb upstream, 10kb downstream; tag  $r^2=0.2$ ). Any associated regions that are physically overlapping with each other or spanning the same gene were collapsed into one, so

that association signals from the same genes were not double-counted. Lastly, enrichment tests were conducted as follows: For each GO term, we counted the number of association intervals that intersected with at least one target gene annotated by that GO term. We then calculated for each term, the probability of observing at least the same number of intersecting intervals by chance alone, via a random-genomic shuffling permutation procedure. Specifically, our permutation procedure controlled potential biases due to different SNP and gene density, and gene sizes by matching the genomic characteristics of the randomly selected intervals to those of the originally associated genomic intervals. That is, the total number of SNPs, genes, and size of the random intervals were constrained to approximately match those of the originals within a factor of 0.9 to 1.1. We repeated this permutation procedure 100,000 times to generate a null distribution of the enrichment statistics. We then corrected for multiple testing of 6,600 gene sets by evaluating the distribution of minimum empirical  $p$ -values under the null hypothesis, given that 6,600 targets were tested. As shown in Tables S7, only a single GO term that was enriched in the top  $P < 1 \times 10^{-3}$  association regions withstood experiment-wide correction for multiple testing: GO:0005262, *calcium channel activity* ([http://amigo.geneontology.org/cgi-bin/amigo/term\\_details?term=GO:0005262](http://amigo.geneontology.org/cgi-bin/amigo/term_details?term=GO:0005262)). This gene set represents a group of 73 genes involved in the facilitated diffusion of calcium ions through a trans-membrane channel in response to changes in membrane potential. Among 73 genes, 2 genes on the X chromosome were excluded in the analysis, and overlapping genes were merged as one gene segment, resulting in 67 gene segments (CACNA2D4 and

CACNA1C combined; CACNG4 and CACNG1 combined; CACNG6, CACNG7, and CACNG8 combined; for details Table S9). Among the 67 gene regions, 20 regions are present in independent association-intervals. The probability of this enrichment (controlling for the total SNP and gene-density in the association-intervals) is  $P = 9.99e-06$ ; the probability of observing an empirical p-value this small, given all the 6,600 targets tested, is  $P = 0.03659$ . The associated twenty gene segments are: *CATSPER4*, *CACNA1E*, *CACNA1S*, *TMEM37*, *ITPR1*, *CACNA2D2*, *CACNA1D*, *GPM6A*, *TRPM3*, *GRIN3A*, *CACNB2*, *CALHM1*, *CATSPER1*, *TPCN2*, *CACNA2D4-CACNA1C*, *ITPR2*, *TRPC4*, *PSEN1*, *CATSPER2*, and *GRIN2A* (see Table S8). Note that the two gene regions, *CACNA2D4* and *CACNA1C* intersect with each other, and were considered as one genic region to avoid inflated type I errors of pathway enrichment due to physically clustered genes<sup>11,12</sup>.



## VII. eQTL Enrichment Analysis

The primary hypothesis we examined here is that SNPs selected from the primary cross-disorder meta-analysis may influence susceptibility to psychiatric illnesses by affecting cis-regulatory gene expression in the human brain. To test the hypothesis, we conducted the eQTL enrichment test described in Nicolae et al.<sup>10</sup>, assessing whether our CD-related SNPs are more likely to be cis-regulatory eQTL markers in cortical brain regions. This analysis used six eQTL datasets: three postmortem gene expression studies of brain cortex<sup>11-13</sup>, one liver<sup>14</sup>, one normal skin<sup>15</sup>, and one lymphoblastoid cell line dataset<sup>16</sup>. In brief, for each eQTL dataset, 10,000 randomized SNP sets were generated, each of the same size as the examined CD-analysis derived SNP list (thresholded at  $p < 1e-02$ ,  $1e-01$ ,  $2e-01$ ,  $3e-01$ ,  $4e-01$ ,  $5e-01$ ), and matched on MAF distribution. Sampling was conducted through a random selection without replacement from all genic SNPs (within 1Mbases from transcription start/end sites) with imputation quality scores exceeding  $R^2 = 0.8$  in the primary meta-analysis. These simulations yielded an empirical eQTL enrichment P-value, calculated as the proportion of 10,000 randomized sets in which the number of eQTL SNPs selected in the set is at least the same as the originally observed number in the cross-disorder association SNP list. The same procedures were repeated using LD-pruned SNPs from association regions (i.e., PLINK LD clumping  $r^2=0.8$ , clumping  $kb=500$ ). Due to extensive LD, only one association region was retained for the MHC region on chr. 6:25000000..35000000.

The following table describes the eQTL datasets used in this analysis.

| eQTL Data Summary                                                    | Brain Prefrontal Cortex (Colantuoni et al. <sup>13</sup> ) | Brain Cortex (Myers et al. <sup>11</sup> ) | Brain Cortex (Webster et al. <sup>12</sup> ) | Liver (Schadt et al. <sup>14</sup> ) | Skin (Ding et al. <sup>15</sup> ) | LPL (Stranger et al. <sup>16</sup> ) |
|----------------------------------------------------------------------|------------------------------------------------------------|--------------------------------------------|----------------------------------------------|--------------------------------------|-----------------------------------|--------------------------------------|
| Number of Subjects in the original eQTL Study                        | 269                                                        | 193                                        | 364                                          | 427                                  | 57                                | 270                                  |
| Total Number of SNPs examined in the original eQTL Study             | 625,439                                                    | 366,140                                    | 502,627                                      | 782,476                              | 438,670                           | 2,200,000                            |
| Total Number of mRNA transcripts examined In the original eQTL Study | 30,176                                                     | 14,078                                     | 24,357                                       | 39,280                               | 54,000                            | 47,294                               |
| Number of <i>cis</i> -eQTL SNPs included in current analysis         | 1,628                                                      | 3,240                                      | 1,571                                        | 1,268                                | 6,250                             | 7,015                                |

**Colantuoni et al. 2011**<sup>13</sup> investigated the temporal dynamics and genetic control of mRNA expression in human prefrontal cortex of 269 healthy subjects from fetal to adult developmental stages. RNA expression profiles were produced for 49,152 probes, yielding 30,176 mRNA transcripts after QC procedures. Genotyping was conducted using Illumina BeadChips. After QC, 625,439 SNPs remained. Linear

regression-based QTL analyses were performed for every SNP-mRNA pair, and associations for 1,628 pairs surpassed genomewide significance after Bonferroni corrections. The same analyses were repeated for African American (n=147) and Caucasian (n=112) samples separately, yielding 560 and 759 significant eQTL markers, respectively. Our analysis were based on the eQTL analysis results conducted for all samples obtained from the publication supplementary materials.

**Webster et al. 2009**<sup>12</sup> examined postmortem brain samples from 279 healthy subjects and 486 late-onset Alzheimer patients. Genotyping was conducted using the Affymetrix GeneChip 500K Array (502,627 SNPs). Expression profiles were generated using Illumina Human Refseq-8 BeadChip for 24,357 transcripts. After QC, eQTL analysis was done for 380,157 SNPs and 8,650 transcripts. The authors included an interaction term for diagnosis to capture differential effects based on disease status. Genome-wide significance for each transcript was calculated using sample-swapping-based permutation. Our analysis was based on the 1,571 eQTL markers without a significant interaction for diagnosis (obtained from the publication supplementary materials).

**Myers et al. 2007**<sup>11</sup> conducted eQTL analyses in three brain cortical regions: frontal, temporal and parietal. This study analyzed 193 neuropathologically normal subjects using the Affymetrix 500K Array for genotyping and the Illumina HumanRefseq-8 Expression Array for gene expression measurements. After QC, 366,140 SNPs were examined for the expression of 14,078 transcripts, resulting in

433 SNP–transcript pairs (99 transcripts) that showed significant cis-association (transcript-specific empirical P-value  $p < 0.05$ ). 25 of the pairs survived multiple testing correction using a Sidak approach.

**Schadt et al.**<sup>14</sup> analyzed 427 human liver samples to identify DNA variations associated with liver gene expression. Gene expression was measured for 39,280 transcripts using Agilent microarray and genotyping was done for 783,476 SNPs using Affymetrix 500K and Illumina 650Y arrays. eQTL association analysis was done using the Kruskal-wallis test to identify cis (<1Mb probe to SNP) and trans associations. Our analysis based on 1,268 cis eQTL markers with association  $p < 1e-09$  downloaded from the GTEx (Genotype-Tissue Expression) eQTL Browser website (<http://www.ncbi.nlm.nih.gov/gtex/GTEX2/gtex.cgi>).

**Ding et al.**<sup>15</sup> analyzed gene expression data in skin tissue from 53 psoriatic patients and 57 healthy controls. Subjects were genotyped using Perlegen arrays and profiled for gene expression using Affymetrix U133 arrays. The authors tested SNP-gene eQTL associations separately in normal skin and lesional skin. Our analysis was based on 6,250 cis eQTL markers identified in normal skin downloaded from the authors' webpage (<http://www.sph.umich.edu/csg/junding/eQTL/>).

**Stranger et al.**<sup>16</sup> conducted gene expression profiling of lymphoblastoid cell lines derived from 270 HapMap individuals. Illumina's whole genome expression arrays were used for measuring expression values. Linear regression was used for eQTL

association analysis. The significance of the regression  $p$  values was determined using 10,000 permutations. We downloaded the list of 7,015 cis eQTL markers from the GTEx eQTL browser website

(<http://www.ncbi.nlm.nih.gov/gtex/GTEX2/gtex.cgi>).

## Supplemental Results

VIII. Figure S3. Quantile-Quantile plot for the primary 5 disorder meta-analysis

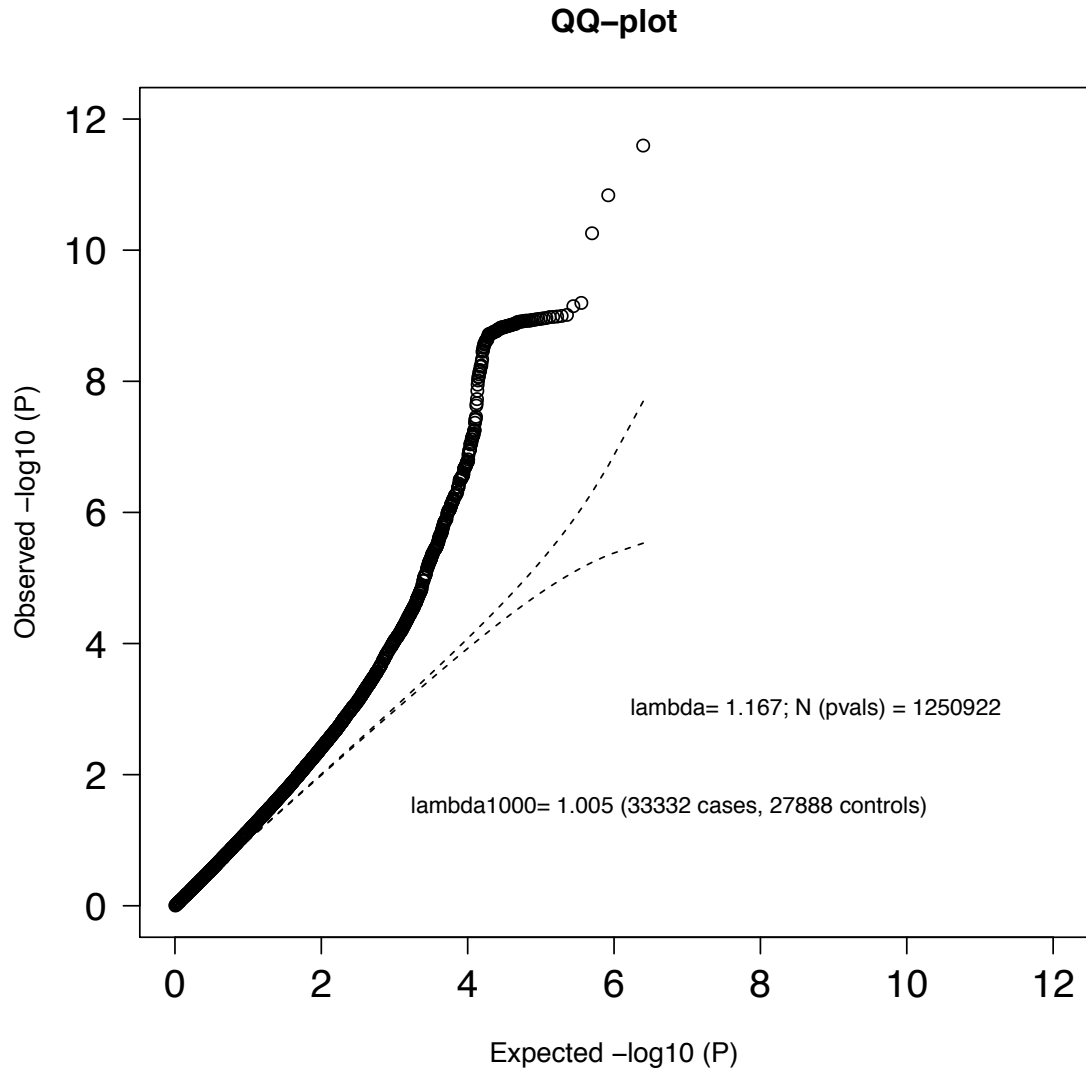



**IX. Table S2: Five disorder meta-analysis results for regions with  $p < 10^{-5}$**

| SNP        | CHR | BP        | Nearest genes | A1A2 | INFO  | P        | OR (95% CI)      | Direction | Het P    |
|------------|-----|-----------|---------------|------|-------|----------|------------------|-----------|----------|
| rs2535629  | 3   | 52808259  | many          | AG   | 0.942 | 2.54E-12 | 1.10 (1.07-1.12) | -----     | 0.2688   |
| rs11191454 | 10  | 104649994 | many          | AG   | 1.01  | 1.39E-08 | 1.13 (1.08-1.18) | +++++     | 0.3172   |
| rs1024582  | 12  | 2272507   | CACNA1C       | AG   | 0.98  | 1.87E-08 | 1.07 (1.05-1.10) | +++++     | 0.005719 |
| rs2799573  | 10  | 18641934  | CACNB2        | TC   | 0.825 | 4.29E-08 | 1.08 (1.05-1.12) | +++++     | 0.565    |
| rs7096169  | 10  | 104608685 | many          | AG   | 1     | 7.02E-08 | 1.07 (1.04-1.10) | +++++     | 0.2969   |
| rs2802535  | 1   | 98280846  | DPYD, MIR137  | TC   | 0.995 | 1.32E-07 | 1.08 (1.05-1.12) | +++++     | 0.07851  |
| rs11152369 | 18  | 51217326  | TCF4          | AC   | 1     | 1.73E-07 | 1.19 (1.12-1.28) | -----     | 0.55     |
| rs9275524  | 6   | 32783087  | many          | TC   | 0.993 | 1.81E-07 | 1.07 (1.04-1.09) | -----     | 0.7078   |
| rs9297357  | 8   | 106211509 | ZFPM2         | TC   | 0.981 | 4.14E-07 | 1.07 (1.04-1.10) | +++++     | 0.7946   |
| rs70018    | 6   | 152815726 | SYNE1         | AG   | 0.996 | 4.93E-07 | 1.06 (1.04-1.09) | +++++     | 0.01944  |
| rs2721800  | 7   | 24659077  | many          | CG   | 0.985 | 5.54E-07 | 1.08 (1.05-1.12) | +++++     | 0.629    |
| rs9951150  | 18  | 50972122  | -             | AG   | 0.984 | 5.64E-07 | 1.06 (1.04-1.09) | -----     | 0.2062   |
| rs12443954 | 16  | 88268997  | many          | AG   | 0.898 | 9.73E-07 | 1.08 (1.04-1.11) | +++++     | 0.7906   |
| rs6694545  | 1   | 30209855  | -             | AG   | 0.923 | 1.05E-06 | 1.07 (1.04-1.11) | +++++     | 0.374    |
| rs12325410 | 16  | 9582747   | -             | TG   | 0.915 | 1.16E-06 | 1.09 (1.05-1.13) | +++++     | 0.9425   |
| rs13418455 | 2   | 180784994 | -             | TC   | 0.98  | 1.17E-06 | 1.06 (1.04-1.09) | +++++     | 0.4747   |
| rs12871532 | 13  | 107466548 | FAM155A       | TC   | 0.973 | 1.29E-06 | 1.06 (1.04-1.09) | -----     | 0.3968   |
| rs6867265  | 5   | 130441880 | many          | AG   | 0.994 | 1.52E-06 | 1.11 (1.06-1.16) | -----     | 0.4028   |
| rs10860392 | 12  | 98022318  | ANKS1B        | TC   | 0.995 | 1.67E-06 | 1.06 (1.04-1.09) | +++++     | 0.6042   |
| rs609412   | 5   | 146205437 | PPP2R2B       | AG   | 0.997 | 2.00E-06 | 1.07 (1.04-1.10) | +++++     | 0.5038   |
| rs249954   | 16  | 23547968  | many          | AG   | 0.95  | 2.22E-06 | 1.07 (1.04-1.10) | -----     | 0.414    |
| rs2297909  | 1   | 199226930 | many          | AG   | 0.986 | 2.27E-06 | 1.06 (1.04-1.09) | -----     | 0.9724   |
| rs6602217  | 10  | 6986269   | -             | TC   | 0.93  | 2.40E-06 | 1.12 (1.07-1.17) | -----     | 0.1408   |
| rs4730430  | 7   | 109835200 | -             | TC   | 0.988 | 2.91E-06 | 1.06 (1.03-1.08) | -----     | 0.06919  |



|            |    |           |                    |    |       |          |                  |       |          |
|------------|----|-----------|--------------------|----|-------|----------|------------------|-------|----------|
| rs2310173  | 2  | 102030060 | MAP4K4, IL1R2      | TG | 0.975 | 2.98E-06 | 1.06 (1.03-1.08) | +++++ | 0.7164   |
| rs2609653  | 8  | 34356534  | -                  | TC | 0.982 | 3.37E-06 | 1.13 (1.07-1.19) | ----+ | 0.02925  |
| rs2186903  | 11 | 107261761 | SLC35F2,<br>RAB39  | AG | 0.921 | 3.70E-06 | 1.07 (1.04-1.11) | ----- | 0.858    |
| rs7700191  | 4  | 102808306 | BANK1              | AG | 0.838 | 3.72E-06 | 1.12 (1.06-1.17) | ----- | 0.2644   |
| rs10873998 | 1  | 79036393  | ELTD1              | TC | 0.881 | 4.04E-06 | 1.06 (1.03-1.09) | +++++ | 0.8589   |
| rs10255295 | 7  | 137509306 | -                  | AG | 0.771 | 4.51E-06 | 1.10 (1.06-1.14) | ----- | 0.204    |
| rs6765687  | 3  | 52708146  | many               | TC | 0.769 | 4.63E-06 | 1.07 (1.04-1.11) | +++++ | 0.2759   |
| rs1107592  | 7  | 2007958   | many               | AG | 0.95  | 5.45E-06 | 1.06 (1.03-1.09) | +++-- | 0.01765  |
| rs11731175 | 4  | 190098245 | -                  | TG | 0.991 | 5.46E-06 | 1.06 (1.03-1.09) | +++++ | 0.5333   |
| rs4650608  | 1  | 79010603  | IFI44L, IFI44      | TC | 0.998 | 5.61E-06 | 1.06 (1.03-1.09) | ++++- | 0.005063 |
| rs1104918  | 15 | 86524716  | NTRK3              | TG | 0.981 | 5.78E-06 | 1.07 (1.04-1.10) | ----- | 0.6807   |
| rs7069733  | 10 | 105287760 | many               | CG | 0.835 | 6.78E-06 | 1.08 (1.04-1.12) | +++++ | 0.3501   |
| rs4741652  | 9  | 2184227   | SMARCA2            | TC | 0.857 | 6.91E-06 | 1.07 (1.04-1.10) | +++++ | 0.2787   |
| rs8058295  | 16 | 9818887   | GRIN2A             | AC | 0.985 | 7.12E-06 | 1.06 (1.04-1.09) | +++++ | 0.7285   |
| rs7254215  | 19 | 14574493  | many               | AG | 0.834 | 7.49E-06 | 1.09 (1.05-1.13) | ----- | 0.6357   |
| rs3791556  | 2  | 239777909 | HDAC4,<br>MGC16025 | AG | 0.954 | 7.65E-06 | 1.08 (1.04-1.11) | ----- | 0.2316   |
| rs360932   | 4  | 153127619 | -                  | AG | 0.991 | 8.36E-06 | 1.06 (1.03-1.08) | +++++ | 0.07611  |
| rs13072940 | 3  | 36817627  | many               | AT | 0.955 | 8.60E-06 | 1.06 (1.03-1.08) | ----+ | 0.007166 |
| rs11191732 | 10 | 105321751 | many               | AG | 0.979 | 8.65E-06 | 1.07 (1.04-1.10) | +++++ | 0.2633   |
| rs1533087  | 20 | 542780    | many               | TC | 0.834 | 8.81E-06 | 1.06 (1.03-1.09) | ----- | 0.8698   |
| rs11587682 | 1  | 148590908 | many               | TC | 0.985 | 9.48E-06 | 1.09 (1.05-1.13) | ----+ | 0.01793  |
| rs2941579  | 2  | 54715329  | many               | TC | 0.993 | 9.89E-06 | 1.08 (1.04-1.11) | +++++ | 0.7605   |

**X. Figure S4: Regional Plots for Top Results ( $p < 10^{-6}$ ) from Primary Meta-Analysis**

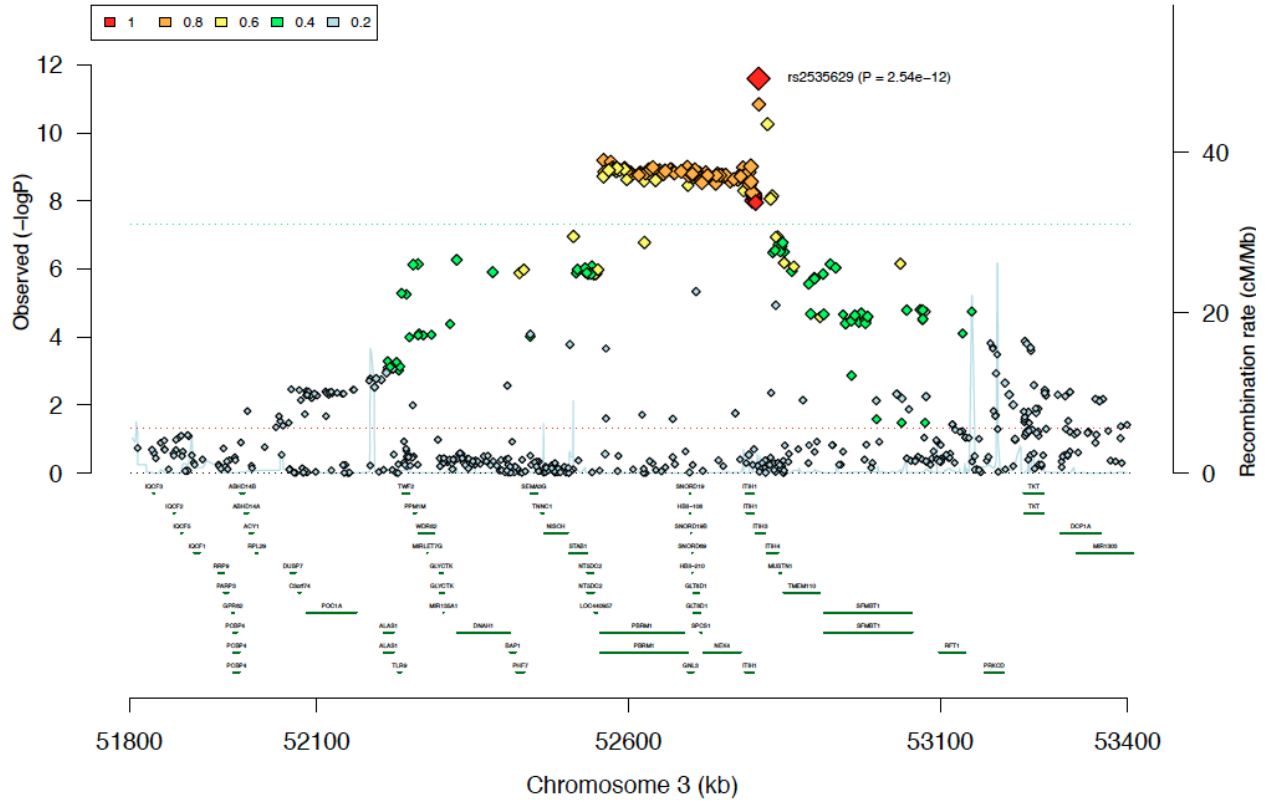

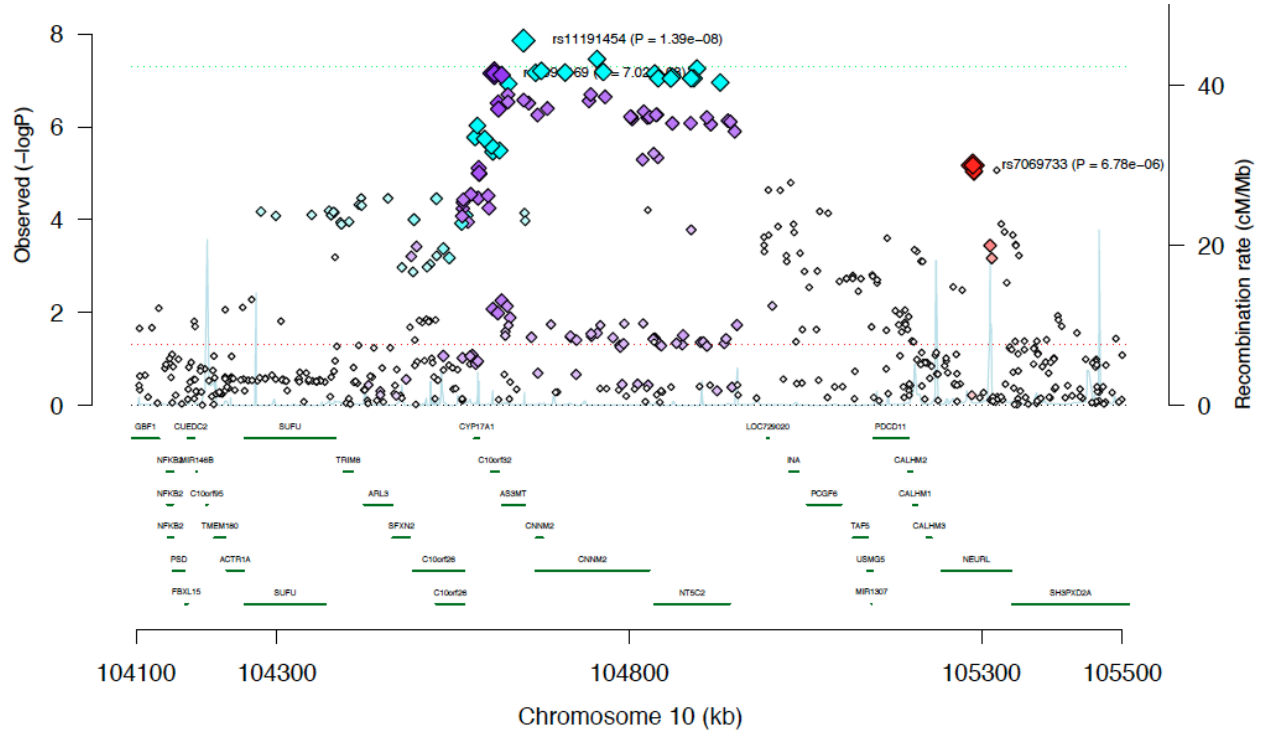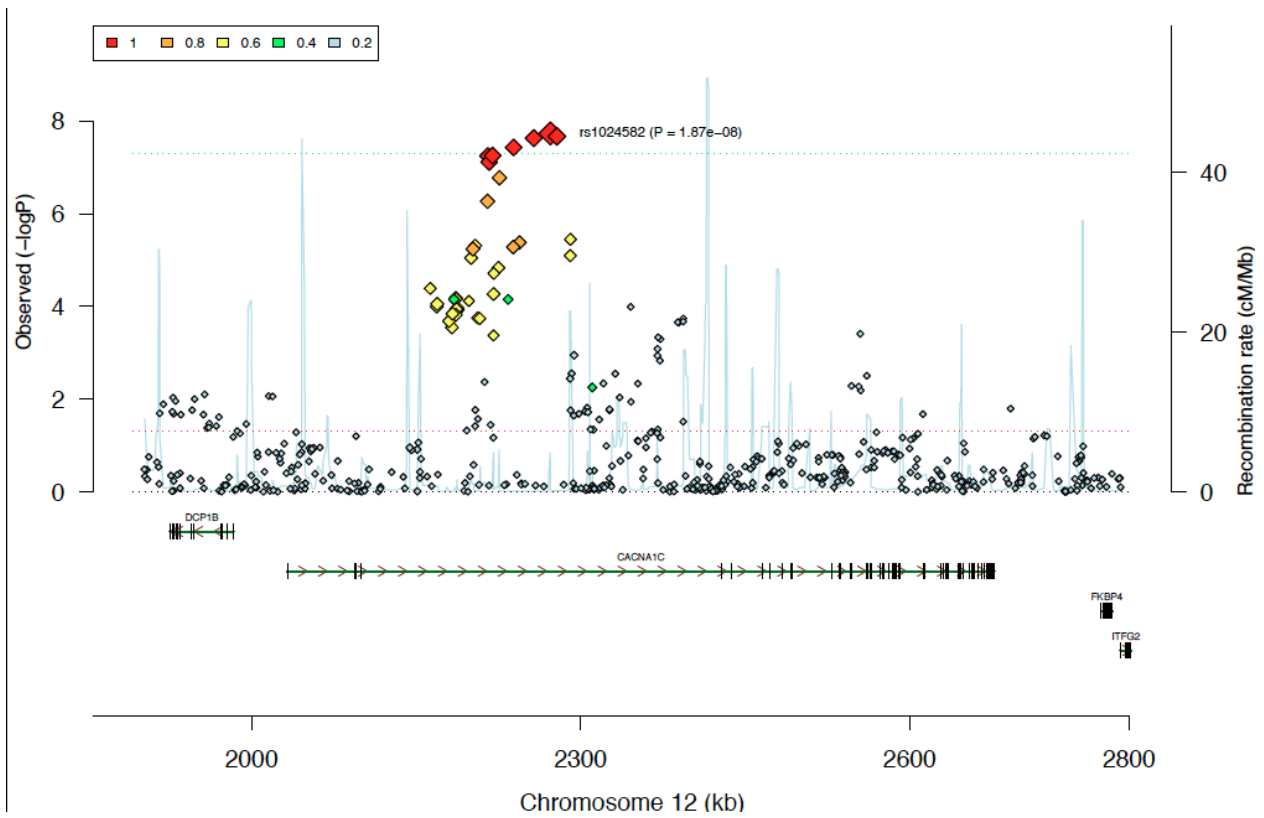

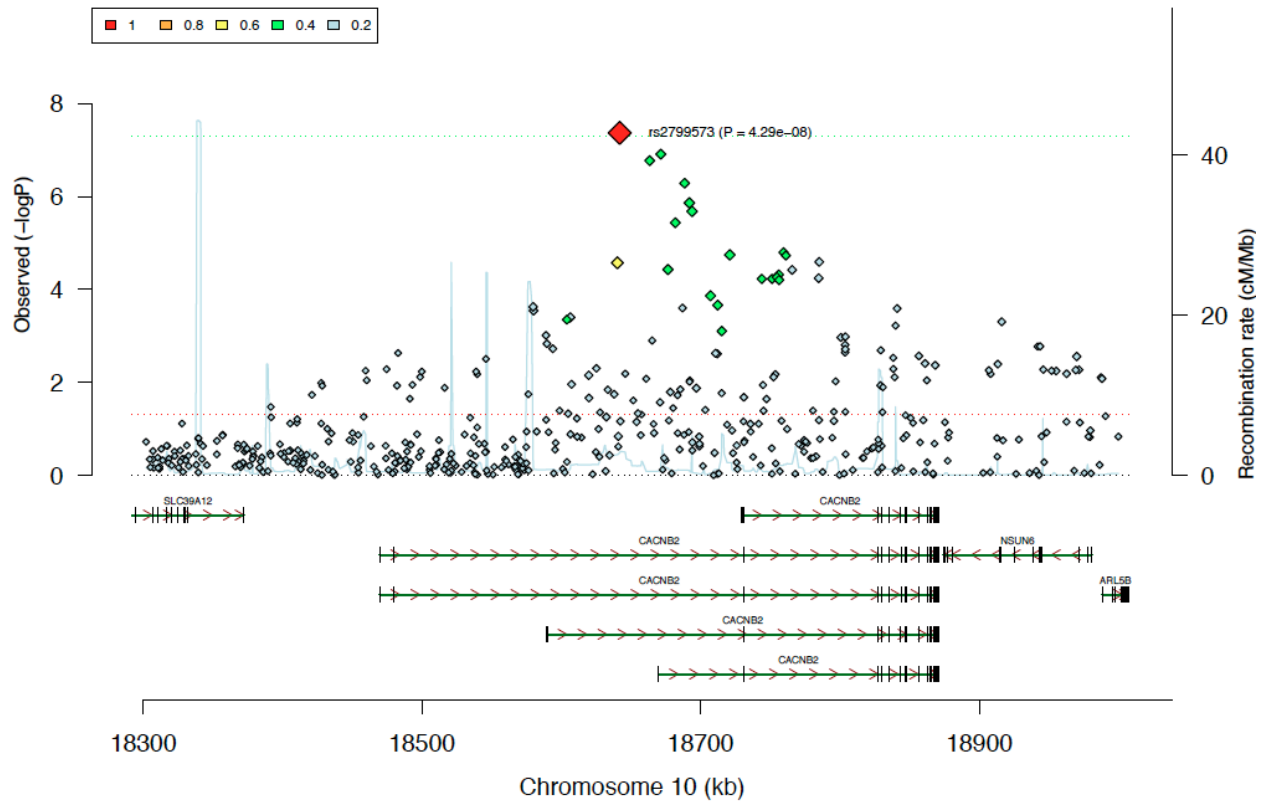

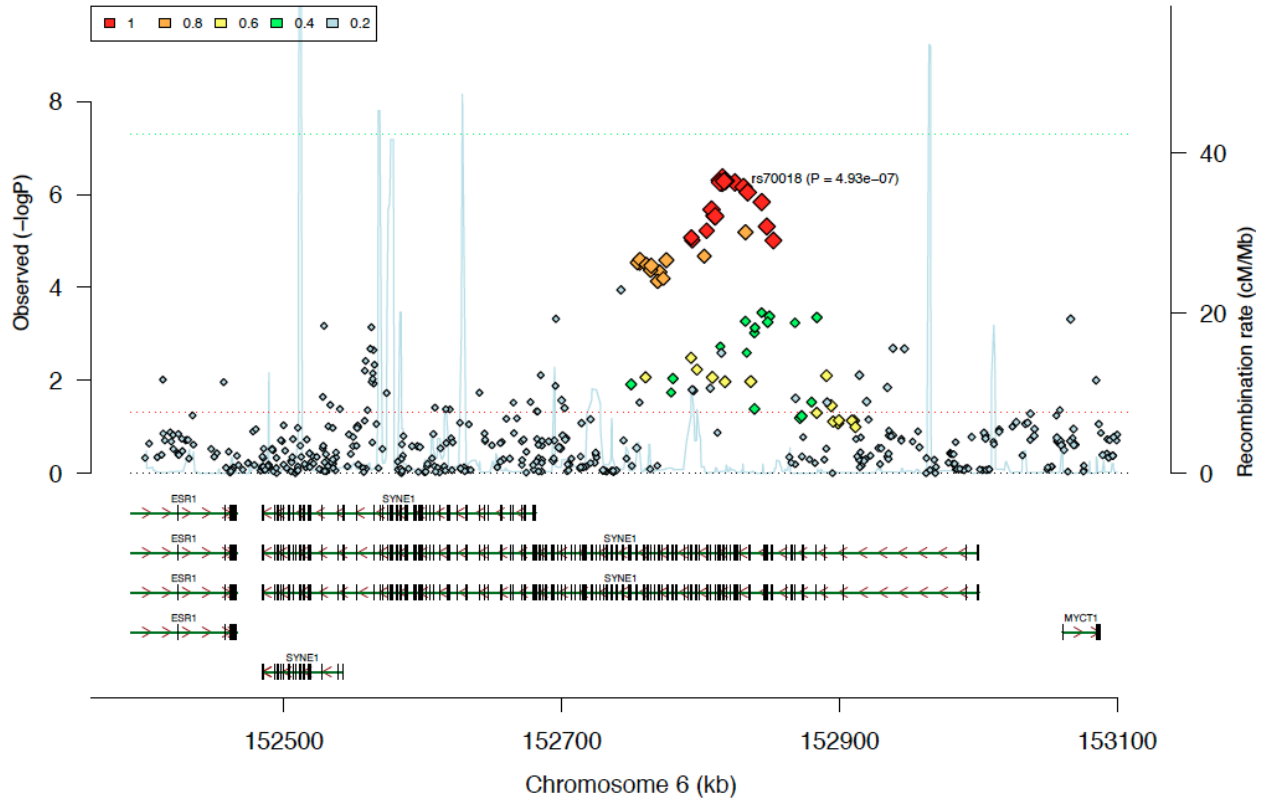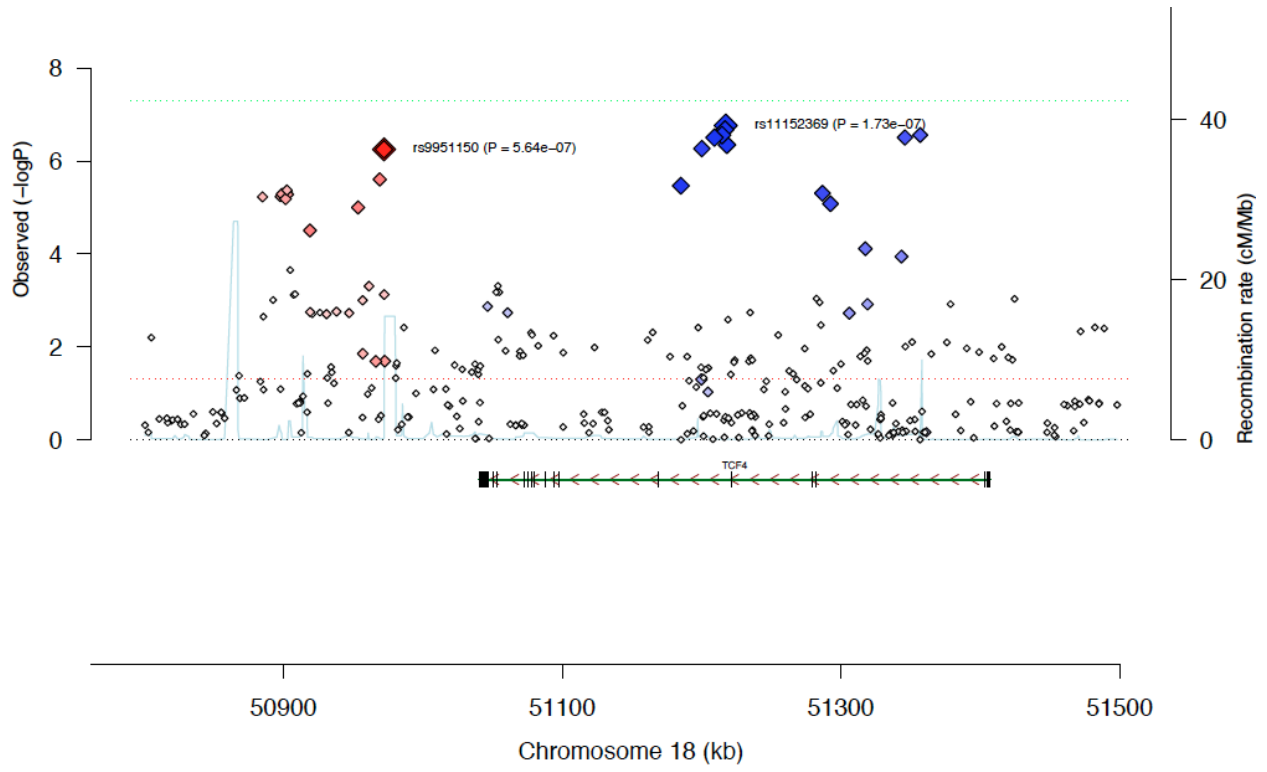

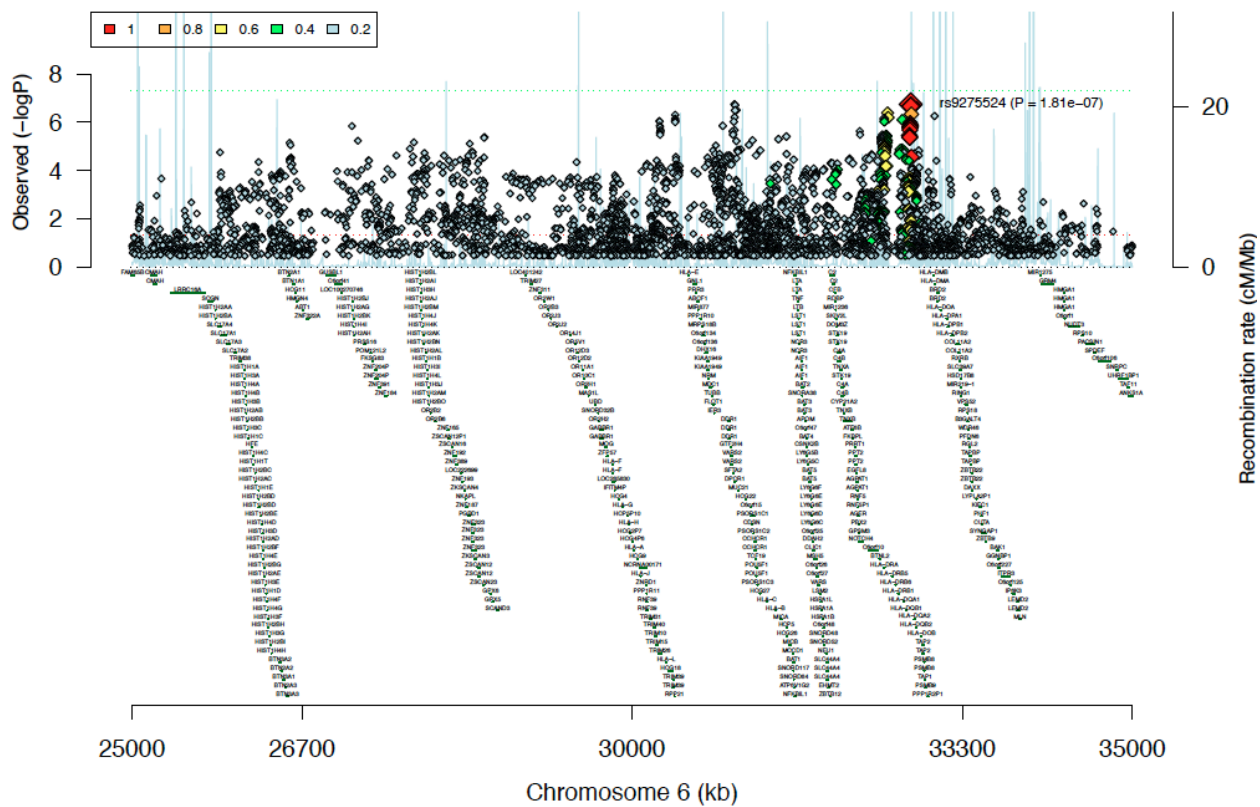

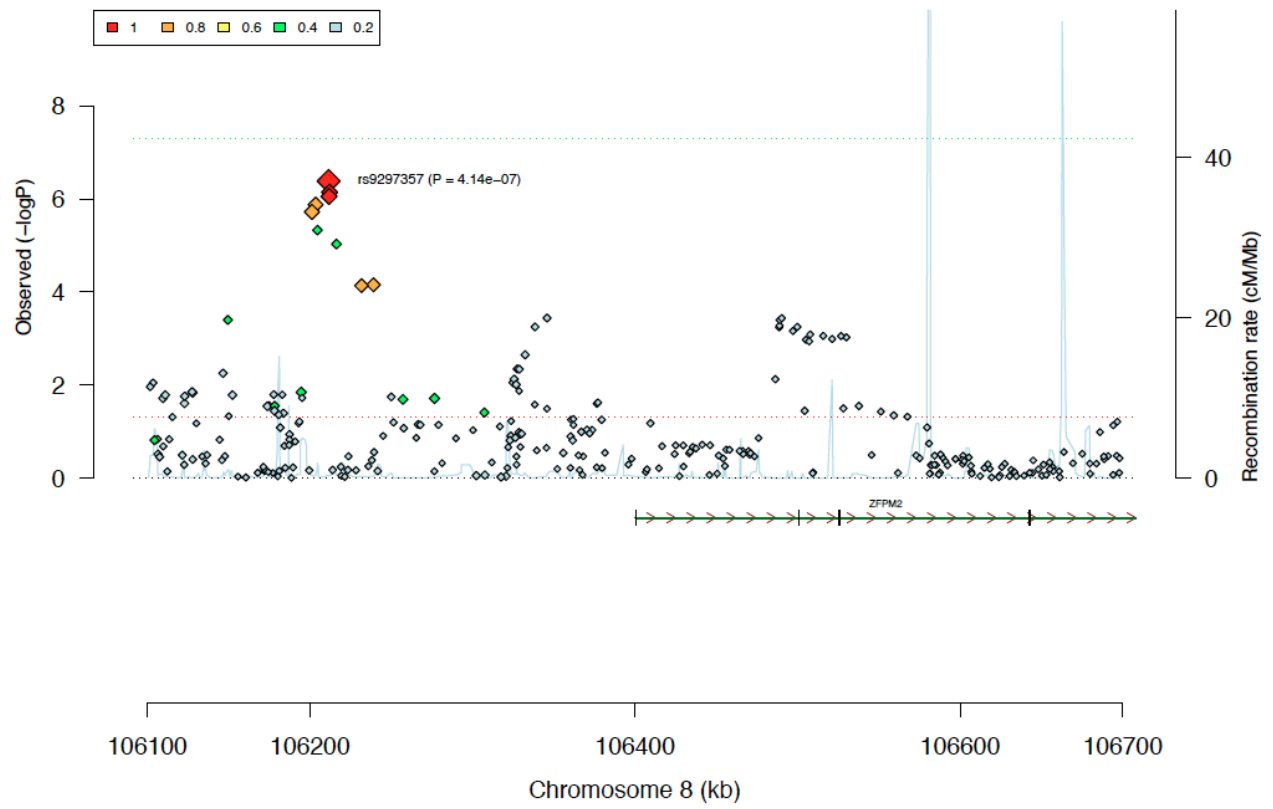

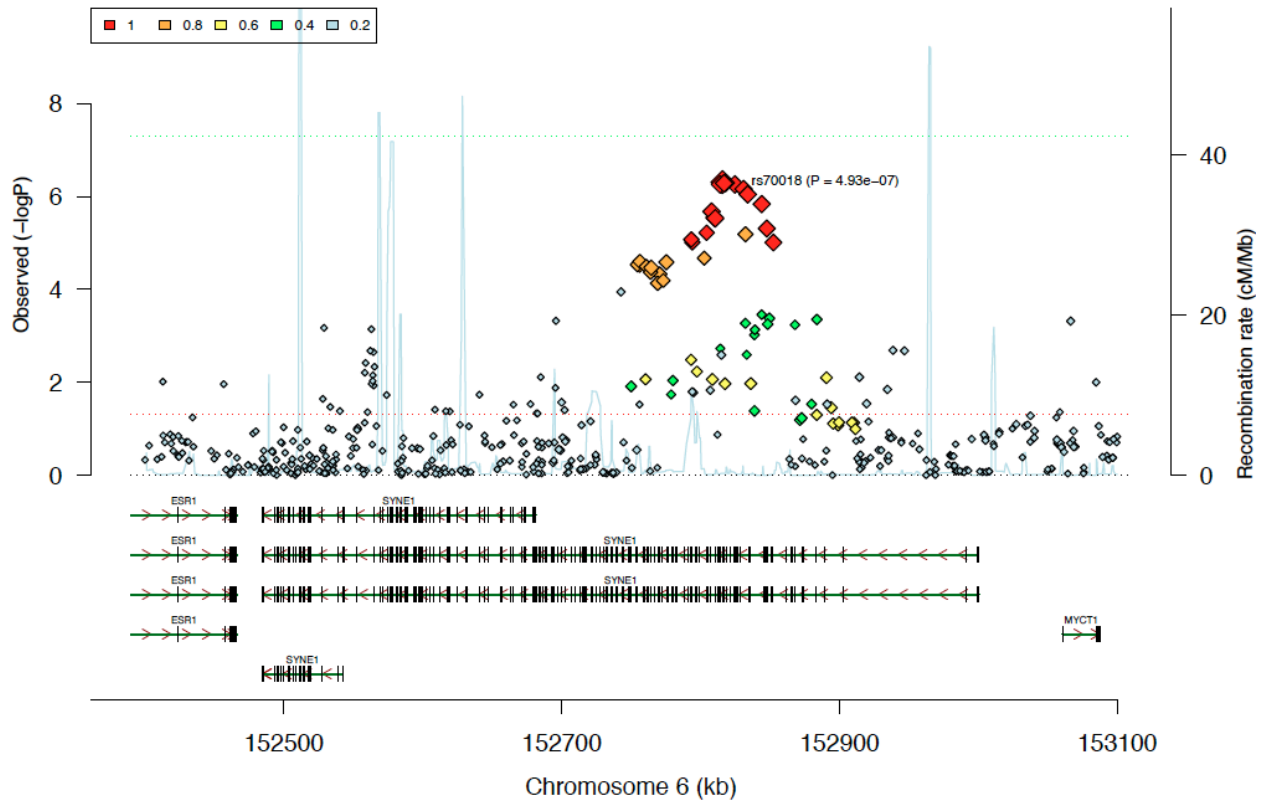



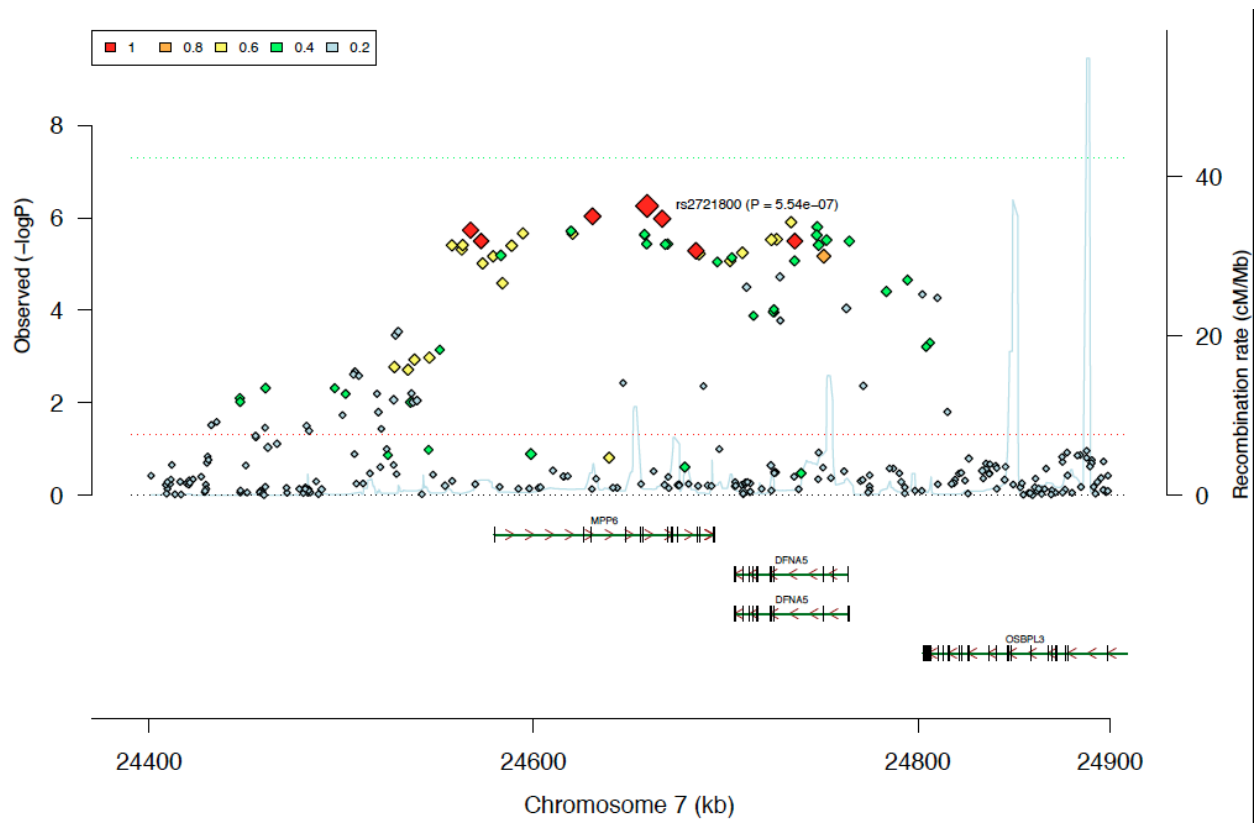

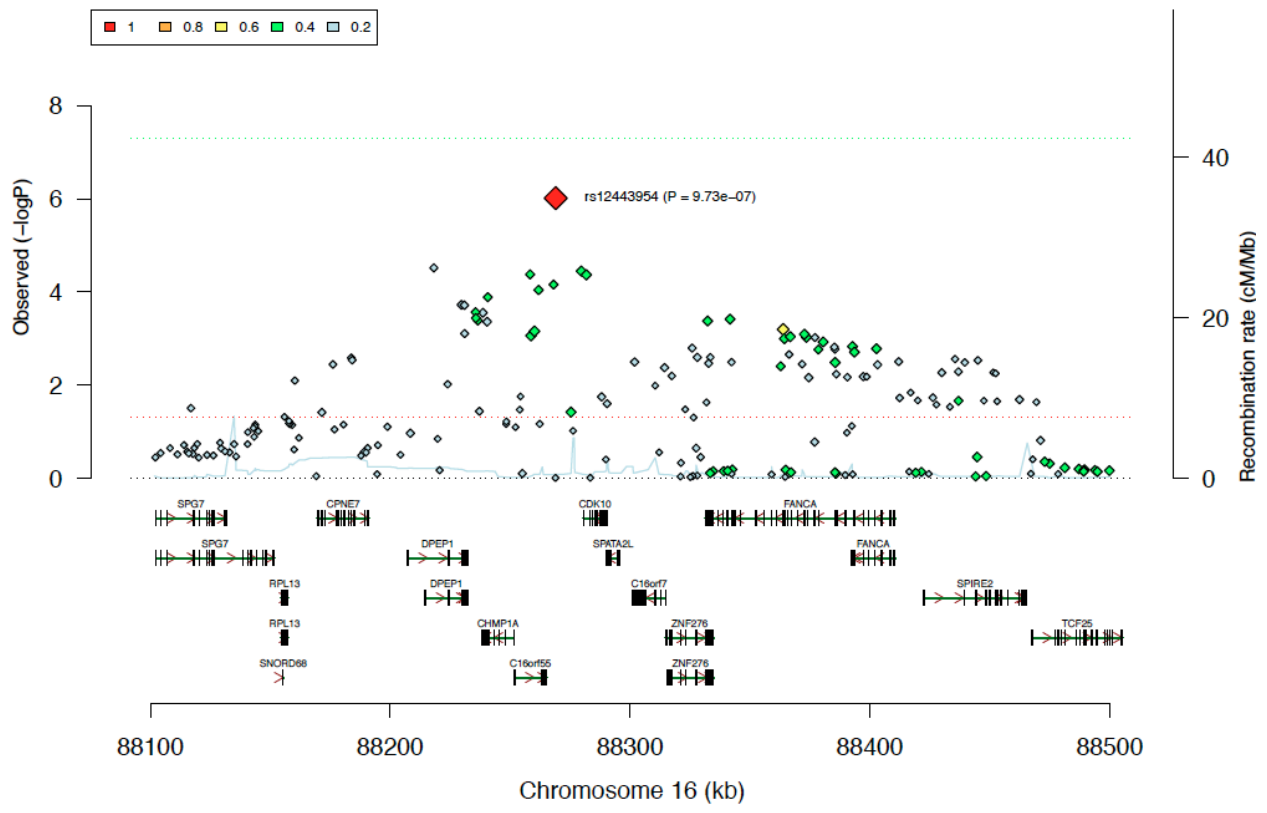

**XI. Table S3: Modeling analysis results for SNPs in regions with a meta analysis  $p < 1 \times 10^{-6}$**

| SNP        | CHR | BP        | Nearest Gene    | Alleles | Freq  | $P_{meta}$             | BIC Model  | Odds Ratio Estimated from BIC Model |       |       |       |       |
|------------|-----|-----------|-----------------|---------|-------|------------------------|------------|-------------------------------------|-------|-------|-------|-------|
|            |     |           |                 |         |       |                        |            | ADHD                                | ASD   | BP    | MDD   | SCZ   |
| rs2535629  | 3   | 52808259  | many            | G/A     | 0.651 | $2.54 \times 10^{-12}$ | 5 Disorder | 1.095                               | 1.095 | 1.095 | 1.095 | 1.095 |
|            |     |           |                 |         |       |                        | Omnibus    | 1.077                               | 1.107 | 1.120 | 1.073 | 1.099 |
| rs11191454 | 10  | 104649994 | many            | A/G     | 0.910 | $1.39 \times 10^{-8}$  | 5 Disorder | 1.122                               | 1.122 | 1.122 | 1.122 | 1.122 |
|            |     |           |                 |         |       |                        | Omnibus    | 1.124                               | 1.103 | 1.137 | 1.085 | 1.159 |
| rs1024582  | 12  | 2272507   | CACNA1C         | A/G     | 0.337 | $1.87 \times 10^{-8}$  | BP, SCZ    | 1.000                               | 1.000 | 1.088 | 1.000 | 1.088 |
|            |     |           |                 |         |       |                        | Omnibus    | 1.046                               | 1.008 | 1.110 | 1.028 | 1.093 |
| rs2799573  | 10  | 18641934  | CACNB2          | T/C     | 0.715 | $4.29 \times 10^{-8}$  | 5 Disorder | 1.091                               | 1.091 | 1.091 | 1.091 | 1.091 |
|            |     |           |                 |         |       |                        | Omnibus    | 1.170                               | 1.119 | 1.070 | 1.090 | 1.073 |
| rs7096169  | 10  | 104608685 | many            | A/G     | 0.647 | $7.02 \times 10^{-8}$  | 5 Disorder | 1.055                               | 1.055 | 1.055 | 1.055 | 1.055 |
|            |     |           |                 |         |       |                        | Omnibus    | 1.034                               | 1.038 | 1.053 | 1.056 | 1.072 |
| rs2802535  | 1   | 98280846  | DPYD,<br>MIR137 | T/C     | 0.802 | $1.32 \times 10^{-7}$  | ASD, SCZ   | 1.000                               | 1.127 | 1.000 | 1.000 | 1.127 |
|            |     |           |                 |         |       |                        | Omnibus    | 1.121                               | 1.164 | 1.080 | 1.039 | 1.161 |
| rs11152369 | 18  | 51217326  | TCF4            | C/A     | 0.030 | $1.73 \times 10^{-7}$  | ASD, SCZ   | 1.000                               | 1.278 | 1.000 | 1.000 | 1.278 |
|            |     |           |                 |         |       |                        | Omnibus    | 1.120                               | 1.422 | 1.149 | 1.096 | 1.315 |
| rs9275524  | 6   | 32783087  | many            | C/T     | 0.575 | $1.81 \times 10^{-7}$  | 5 Disorder | 1.074                               | 1.074 | 1.074 | 1.074 | 1.074 |
|            |     |           |                 |         |       |                        | Omnibus    | 1.064                               | 1.125 | 1.098 | 1.039 | 1.069 |
| rs3132581  | 6   | 31021437  | many            | G/A     | 0.860 | $1.83 \times 10^{-7}$  | 5 Disorder | 1.117                               | 1.117 | 1.117 | 1.117 | 1.117 |
|            |     |           |                 |         |       |                        | Omnibus    | 1.079                               | 1.134 | 1.074 | 1.093 | 1.183 |
| rs9276601  | 6   | 32842282  | many            | A/G     | 0.827 | $2.06 \times 10^{-7}$  | 5 Disorder | 1.101                               | 1.101 | 1.101 | 1.101 | 1.101 |
|            |     |           |                 |         |       |                        | Omnibus    | 1.076                               | 1.085 | 1.101 | 1.086 | 1.131 |
| rs9297357  | 8   | 106211509 | ZFPM2           | T/C     | 0.715 | $4.14 \times 10^{-7}$  | 5 Disorder | 1.069                               | 1.069 | 1.069 | 1.069 | 1.069 |
|            |     |           |                 |         |       |                        | Omnibus    | 1.020                               | 1.111 | 1.068 | 1.050 | 1.084 |
| rs70018    | 6   | 152815726 | SYNE1           | A/G     | 0.409 | $4.93 \times 10^{-7}$  | BP         | 1.000                               | 1.000 | 1.111 | 1.000 | 1.000 |
|            |     |           |                 |         |       |                        | Omnibus    | 1.035                               | 1.109 | 1.144 | 1.032 | 1.056 |
| rs1480380  | 6   | 33021224  | many            | C/T     | 0.908 | $5.53 \times 10^{-7}$  | Adult      | 1.000                               | 1.000 | 1.153 | 1.153 | 1.153 |
|            |     |           |                 |         |       |                        | Omnibus    | 1.071                               | 1.033 | 1.132 | 1.137 | 1.224 |

|            |    |          |             |     |       |                       |            |       |       |       |       |       |
|------------|----|----------|-------------|-----|-------|-----------------------|------------|-------|-------|-------|-------|-------|
| rs2721800  | 7  | 24659077 | <i>many</i> | C/G | 0.170 | $5.54 \times 10^{-7}$ | BP, SCZ    | 1.000 | 1.000 | 1.086 | 1.000 | 1.086 |
|            |    |          |             |     |       |                       | Omnibus    | 1.079 | 1.092 | 1.136 | 0.994 | 1.078 |
| rs9951150  | 18 | 50972122 | -           | G/A | 0.448 | $5.64 \times 10^{-7}$ | 5 Disorder | 1.078 | 1.078 | 1.078 | 1.078 | 1.078 |
|            |    |          |             |     |       |                       | Omnibus    | 1.082 | 1.055 | 1.090 | 1.088 | 1.071 |
| rs12443954 | 16 | 88268997 | <i>many</i> | A/G | 0.751 | $9.73 \times 10^{-7}$ | 5 Disorder | 1.078 | 1.078 | 1.078 | 1.078 | 1.078 |
|            |    |          |             |     |       |                       | Omnibus    | 1.074 | 1.075 | 1.100 | 1.043 | 1.099 |

**XII. Table S4: Association analysis results for top SNPs from the 5 degree of freedom test with  $p < 1 \times 10^{-5}$ .** This analysis allowed for equal effects from each disease (independent of sample size) and also allowed the detection of opposite allelic effects in different diseases.

| SNP        | CHR | BP        | P        | OR    | SE    | A1A2 | FRQ   | INFO  | Direction | Gene              |
|------------|-----|-----------|----------|-------|-------|------|-------|-------|-----------|-------------------|
| rs2535629  | 3   | 52808259  | 1.97E-10 | 1.095 | 0.013 | GA   | 0.651 | 0.942 | +++++     | many              |
| rs10994359 | 10  | 61892113  | 2.81E-09 | 1.081 | 0.025 | CT   | 0.064 | 0.989 | +--+      | ANK3              |
| rs1006737  | 12  | 2215556   | 4.97E-09 | 1.071 | 0.013 | AG   | 0.013 | 1.01  | +----     | CACNA1C           |
| rs8321     | 6   | 30140501  | 7.96E-09 | 1.081 | 0.02  | AC   | 0.02  | 1.01  | ----+     | MHC region        |
| rs11191580 | 10  | 104896201 | 4.11E-07 | 1.123 | 0.021 | TC   | 0.021 | 1.01  | +++++     | many              |
| rs9371601  | 6   | 152832266 | 4.66E-07 | 1.058 | 0.013 | TG   | 0.013 | 0.994 | ----+     | SYNE1             |
| rs2252865  | 1   | 8345263   | 5.09E-07 | 1.03  | 0.013 | TC   | 0.013 | 0.998 | +--+      | SLC45A1,RERE,ENO1 |
| rs1198588  | 1   | 98325420  | 5.69E-07 | 1.079 | 0.015 | TA   | 0.788 | 0.985 | ----+     | DPYD,MIR137       |
| rs1715     | 19  | 57186590  | 5.70E-07 | 1.41  | 0.063 | TC   | 0.063 | 0.301 | +++++     | many              |
| rs11191438 | 10  | 104627854 | 1.01E-06 | 1.065 | 0.012 | GC   | 0.586 | 1     | +++++     | many              |
| rs7972947  | 12  | 2040694   | 1.04E-06 | 1.032 | 0.016 | CA   | 0.784 | 0.803 | +--+      | DCP1B,CACNA1C     |
| rs4650608  | 1   | 79010603  | 1.22E-06 | 1.06  | 0.013 | TC   | 0.013 | 0.998 | +----     | IFI44L,IFI44      |
| rs6990255  | 8   | 34246490  | 2.06E-06 | 1.146 | 0.03  | TC   | 0.03  | 0.984 | +----     | -                 |
| rs9834970  | 3   | 36831034  | 2.20E-06 | 1.051 | 0.012 | CT   | 0.491 | 0.972 | ----+     | many              |
| rs7004633  | 8   | 89829427  | 2.73E-06 | 1.049 | 0.016 | GA   | 0.184 | 0.948 | ++--+     | MMP16             |
| rs447      | 7   | 83610351  | 3.63E-06 | 1.025 | 0.015 | CT   | 0.788 | 1     | +----     | SEMA3A            |
| rs2799573  | 10  | 18641934  | 4.10E-06 | 1.084 | 0.015 | TC   | 0.015 | 0.825 | +++++     | CACNB2            |
| rs7799006  | 7   | 2244752   | 4.51E-06 | 1.059 | 0.013 | CT   | 0.635 | 0.924 | +++++     | many              |
| rs363598   | 21  | 29935030  | 4.55E-06 | 1.006 | 0.014 | CT   | 0.256 | 0.99  | +--+      | GRIK1             |
| rs2675968  | 2   | 233444488 | 4.77E-06 | 1.016 | 0.013 | TC   | 0.013 | 0.992 | +--+      | many              |
| rs703970   | 10  | 80623142  | 5.12E-06 | 1.01  | 0.012 | CA   | 0.579 | 0.956 | +--+      | ZMIZ1             |
| rs7948661  | 11  | 117846859 | 5.19E-06 | 1.05  | 0.026 | CT   | 0.058 | 0.942 | +----     | many              |
| rs11827962 | 11  | 22269142  | 6.19E-06 | 1.044 | 0.053 | CT   | 0.984 | 0.847 | ----+     | ANO5,SLC17A6      |
| rs159788   | 20  | 4300104   | 6.56E-06 | 1.012 | 0.019 | GA   | 0.88  | 0.965 | +--+      | -                 |

|            |    |           |          |       |       |    |       |       |       |              |
|------------|----|-----------|----------|-------|-------|----|-------|-------|-------|--------------|
| rs7565792  | 2  | 48503209  | 6.65E-06 | 1.03  | 0.013 | CT | 0.631 | 0.909 | -++++ | many         |
| rs12966547 | 18 | 50903015  | 7.00E-06 | 1.057 | 0.012 | GA | 0.588 | 0.995 | +---- | -            |
| rs11587682 | 1  | 148590908 | 7.26E-06 | 1.086 | 0.019 | CT | 0.877 | 0.985 | +---- | many         |
| rs7597593  | 2  | 185241825 | 7.52E-06 | 1.055 | 0.012 | TC | 0.012 | 0.979 | +---- | ZNF804A      |
| rs6435387  | 2  | 149573496 | 7.56E-06 | 1.129 | 0.033 | GA | 0.962 | 0.941 | ++--  | KIF5C,LYPD6B |
| rs17597926 | 18 | 51356936  | 7.68E-06 | 1.202 | 0.036 | AG | 0.036 | 0.957 | ++++  | TCF4         |
| rs7849973  | 9  | 22809576  | 7.74E-06 | 1.05  | 0.013 | GC | 0.342 | 0.966 | +---- | -            |
| rs10250997 | 7  | 135797076 | 7.96E-06 | 1.03  | 0.02  | CA | 0.89  | 0.945 | ++--  | -            |
| rs961196   | 14 | 90204414  | 9.67E-06 | 1.033 | 0.017 | CT | 0.812 | 0.815 | ++--  | TTC7B        |

**XIII. Figure S5: Comparisons of Model Fit by BIC/AIC criteria for 16 SNPs in regions with a meta analysis  $p < 1 \times 10^{-6}$ .** The blue bar and the red bar represent score differences across 21 models with respect to Bayesian information criterion (BIC) and Akaike information criterion (AIC) measures, respectively. The X-axis represents the 21 disease causal models, while the Y-axis represents the relative difference in the information criterion score of each model compared to that of the highest score model (i.e., worst-fit model). The best-fit model is marked by a circle in each plot. Note that the best-fit model could not be determined when the score difference between the best and the second-best model is  $\leq 2^{17}$

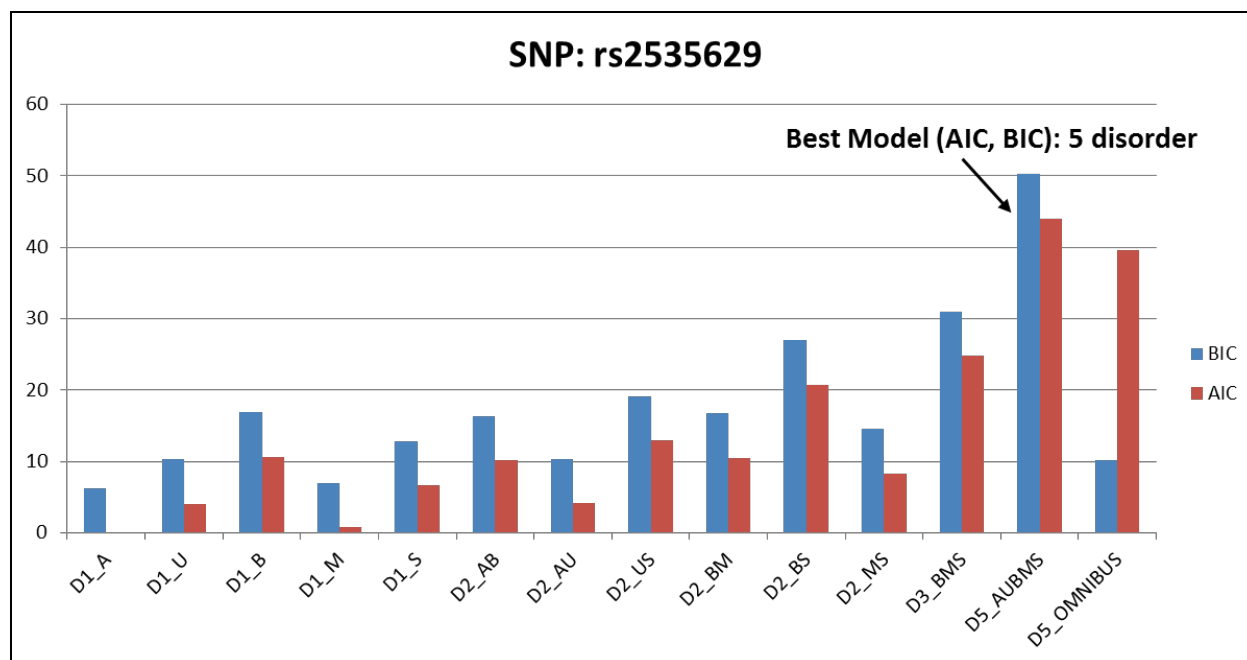

**Legend:** D1\_A : ADHD specific risk model; D1\_U: Autism specific risk model; D1\_B: Bipolar disorder (BP) specific model; D1\_M: major depressive disorder (MDD) specific risk model; D1\_S: schizophrenia (SCZ) specific risk model; D2\_AB: ADHD & BP risk model; D2\_AU: ADHD & Autism risk model; D2\_US: Autism & SCZ model; D2\_BM: BP & MDD risk model; D2\_BS: BP & SCZ risk model; D2\_MS: MDD & SCZ risk model; D3\_BMS: BP & MDD & SCZ risk model; D5\_AUBMS: ADHD, Autism, BP, MDD & SCZ risk model; D5\_OMNIBUS: General disorder risk model

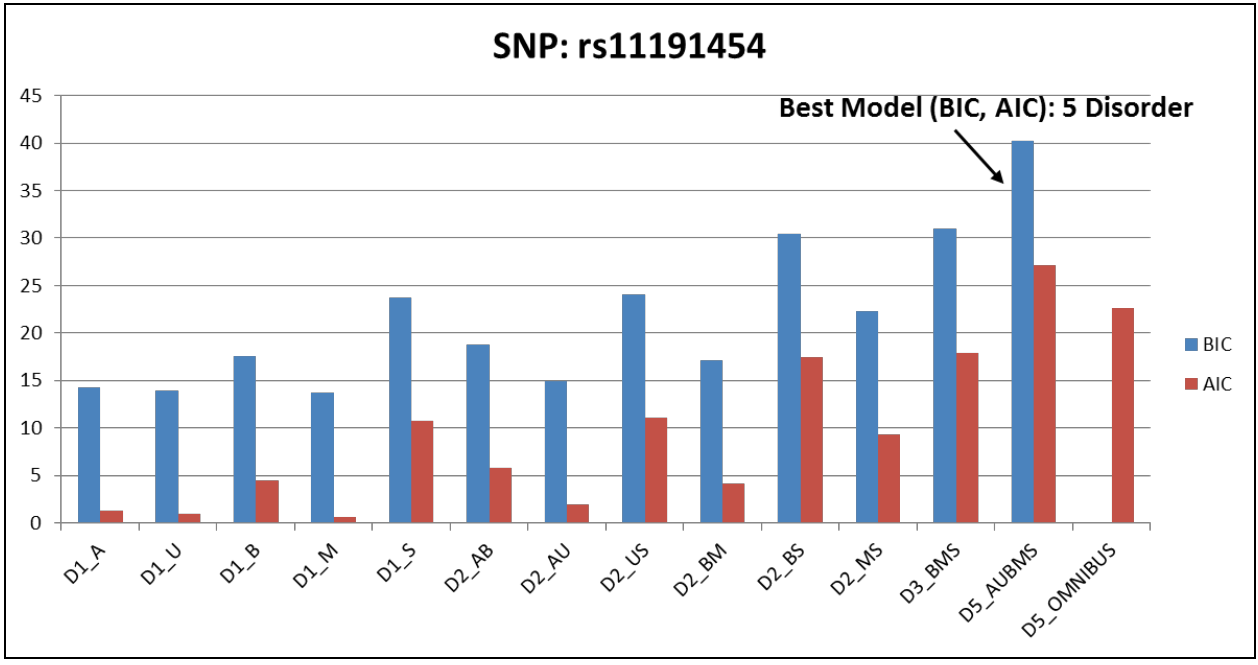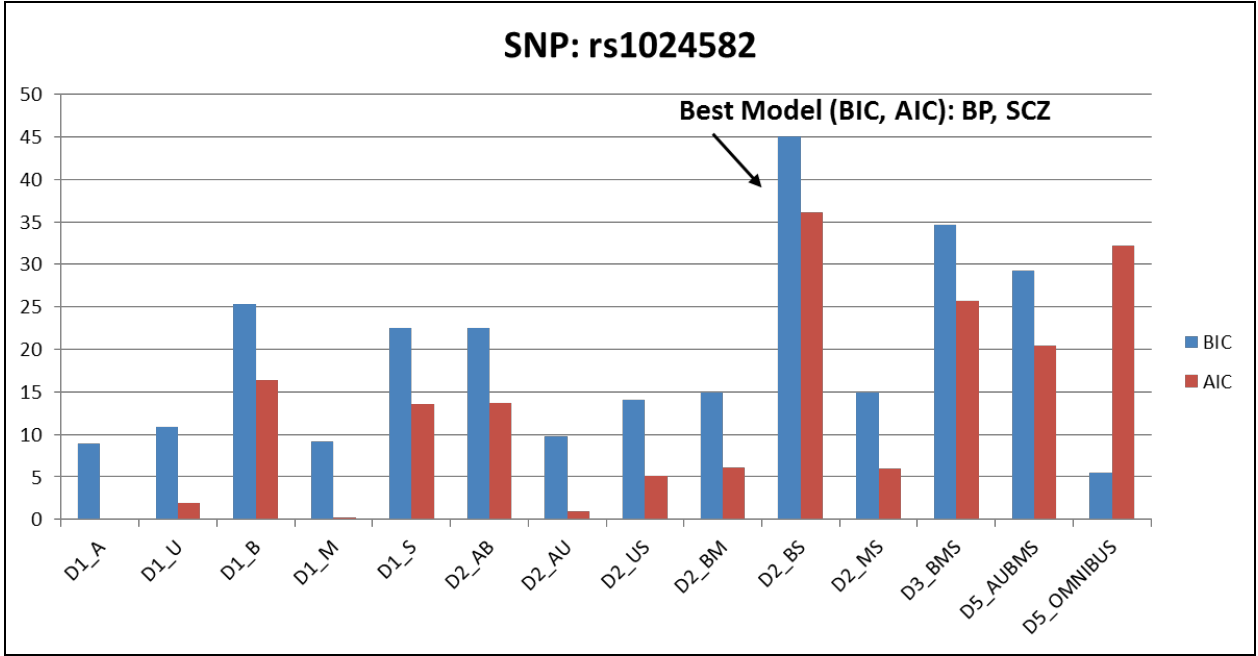



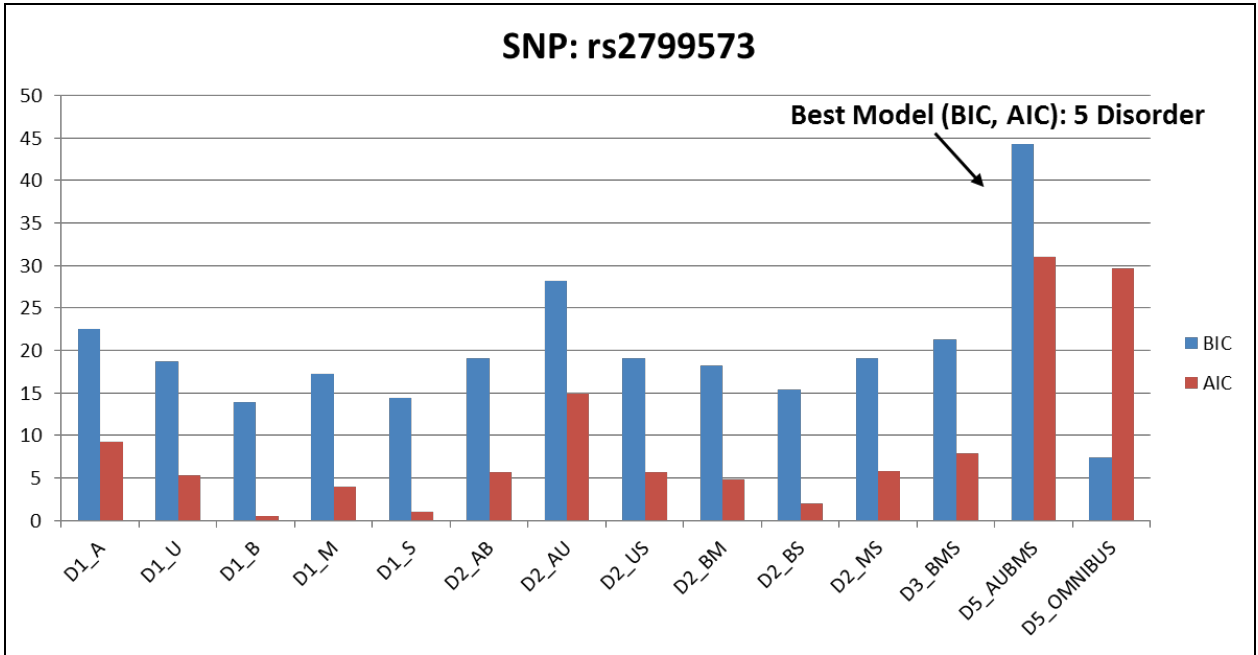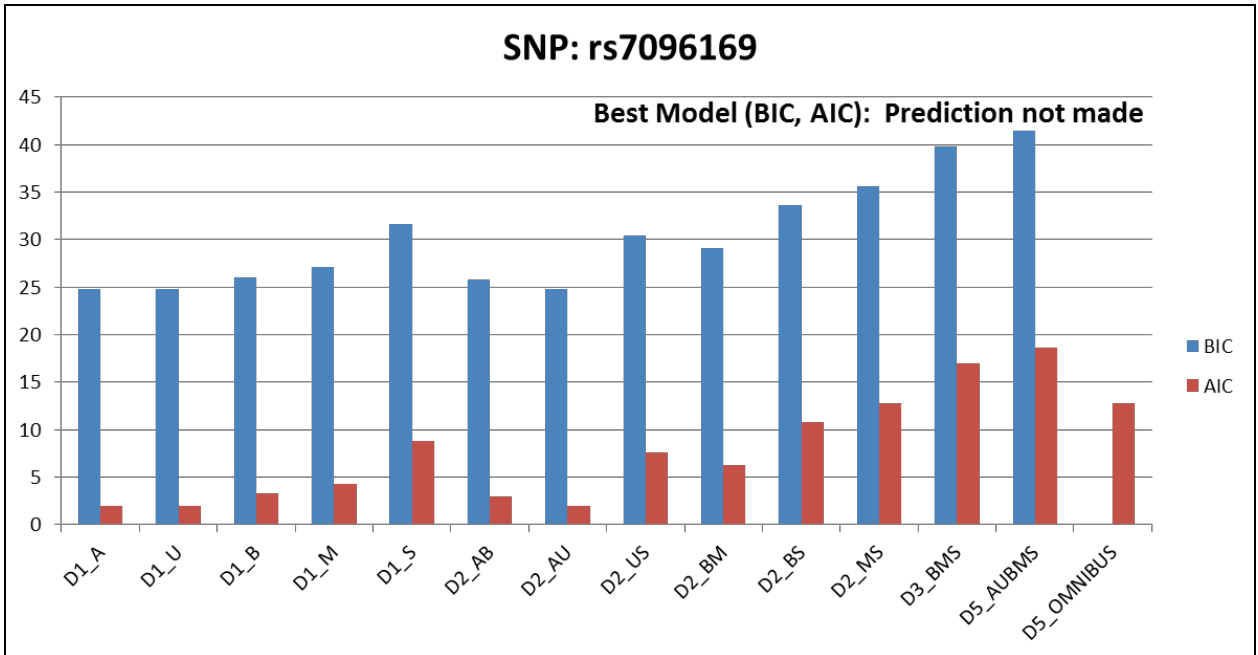

\* SNP rs7096169 : the best and the second best model fitness scores are not significantly different (i.e., > 2), and therefore the best model prediction cannot be made for this SNP.

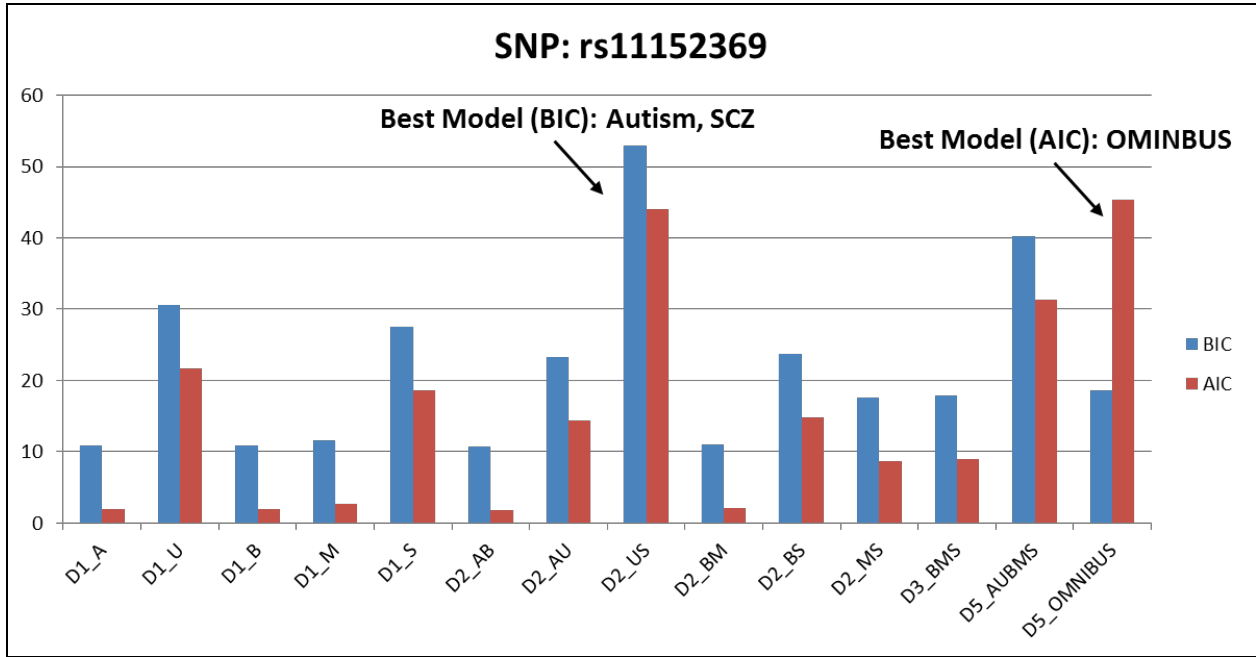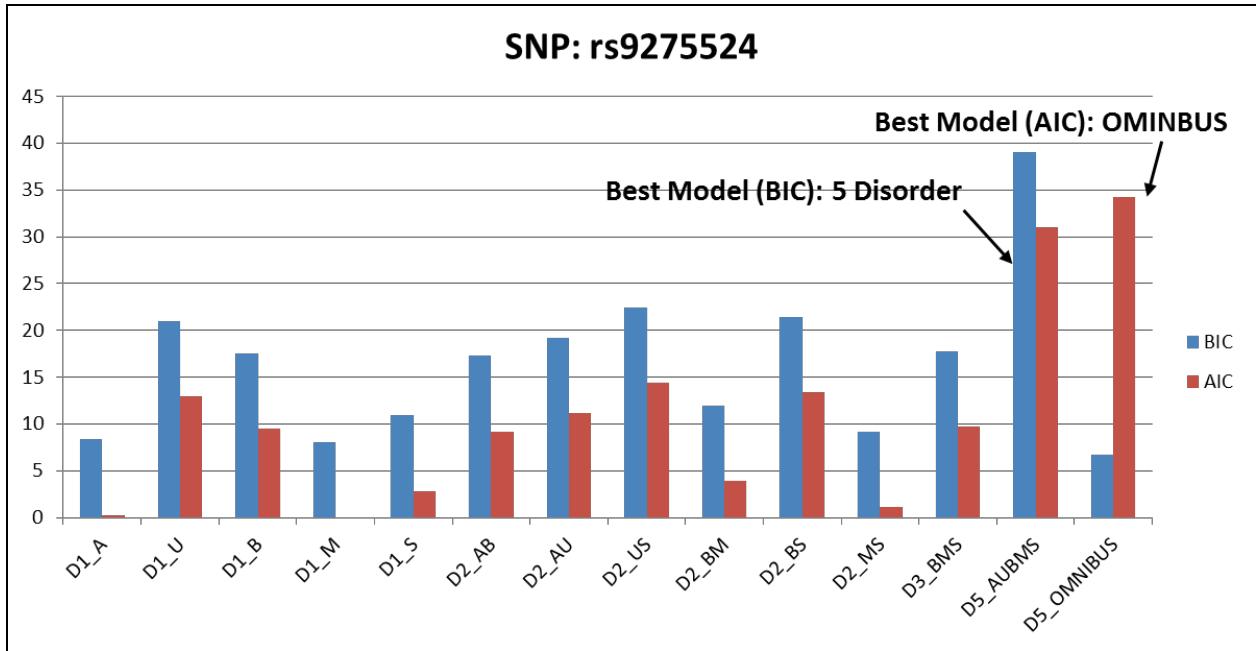

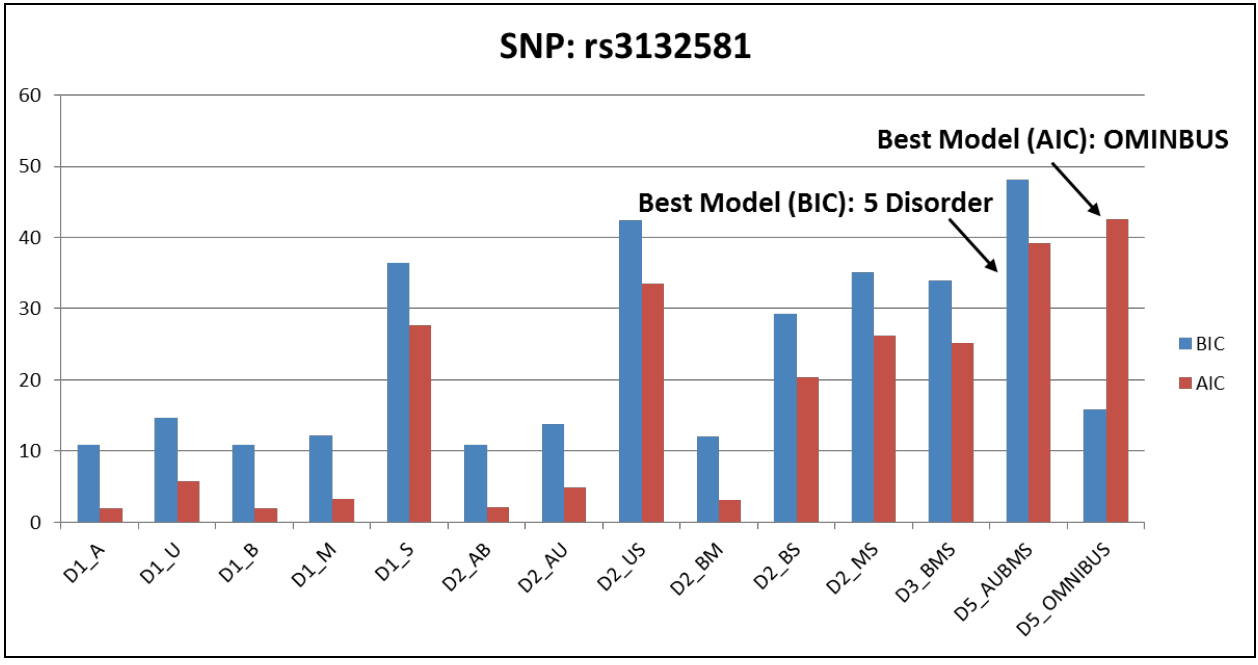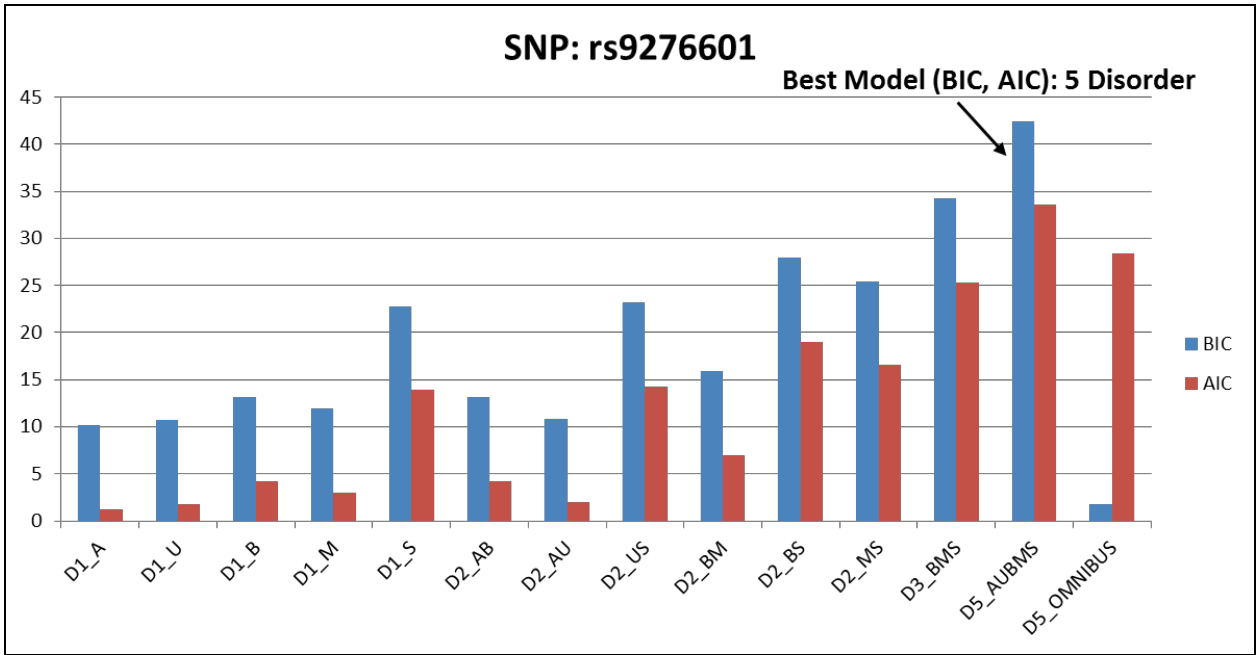

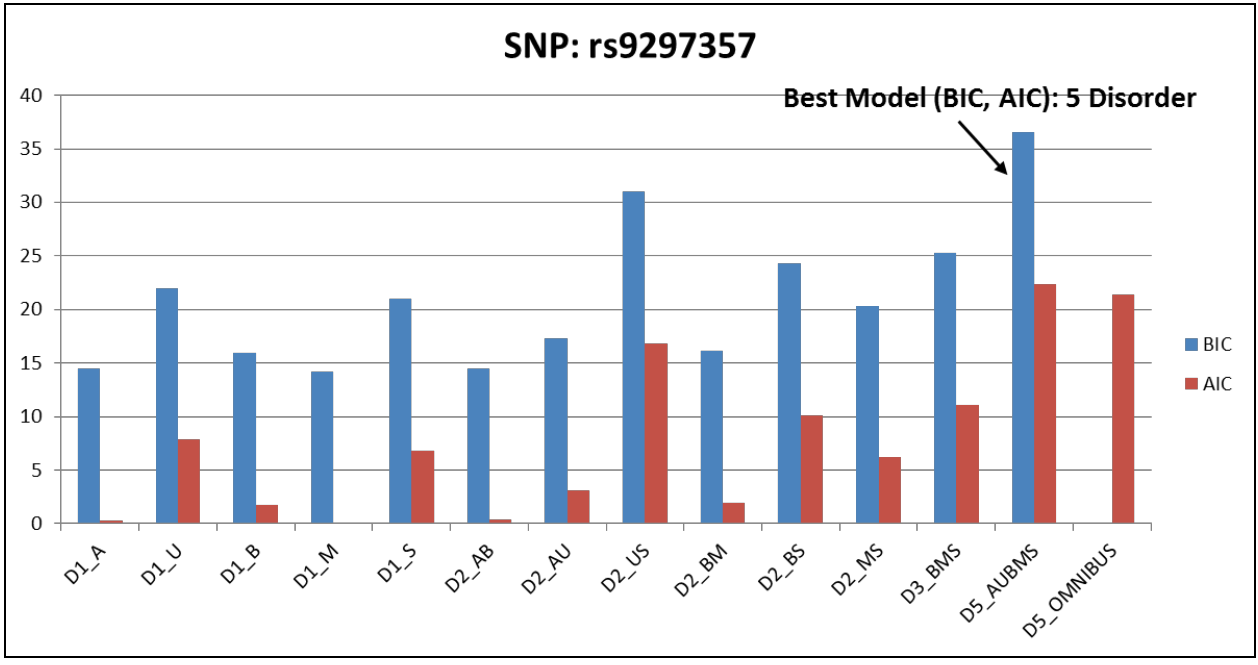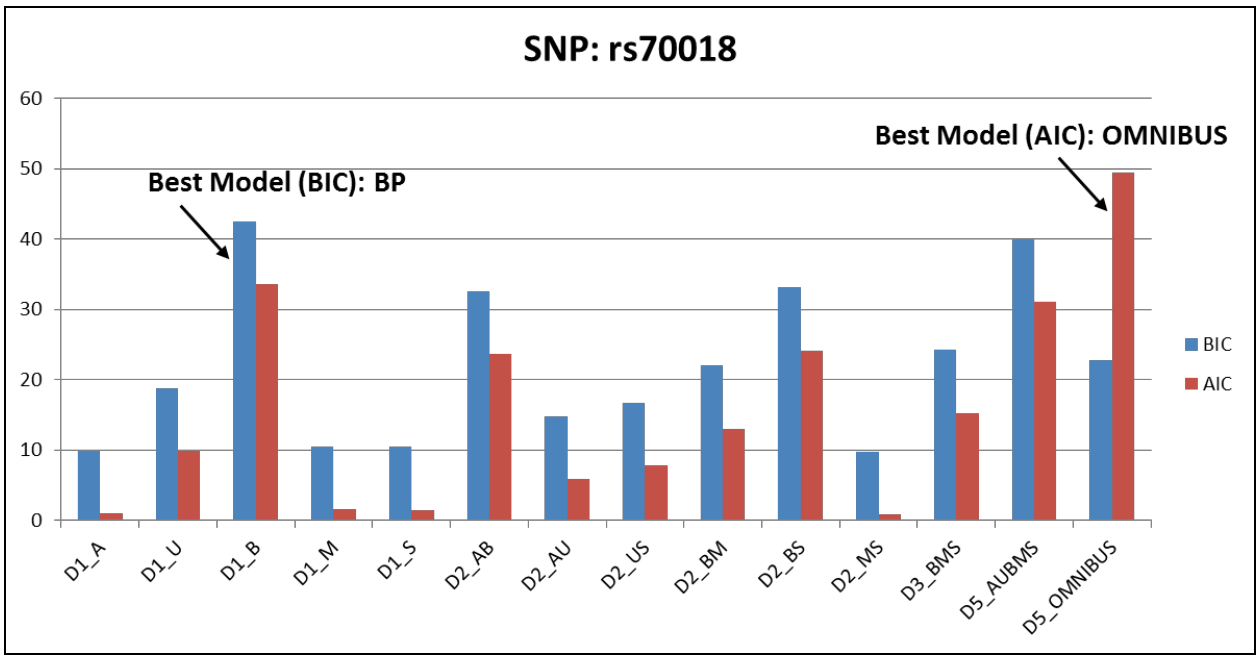

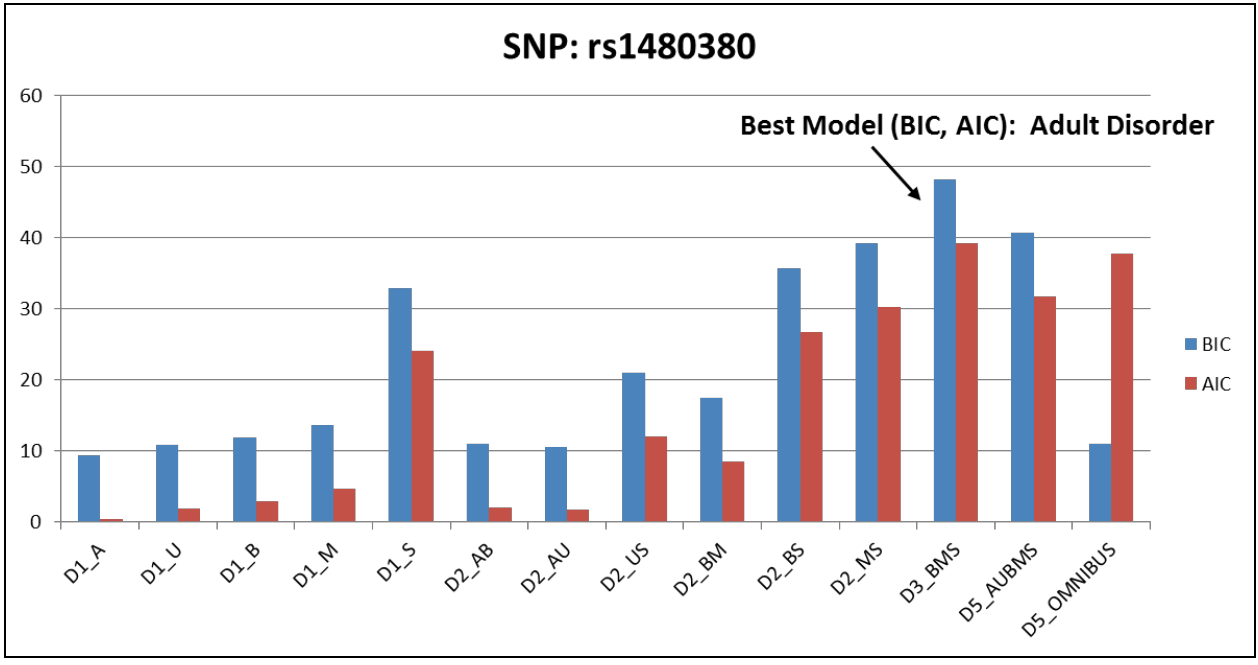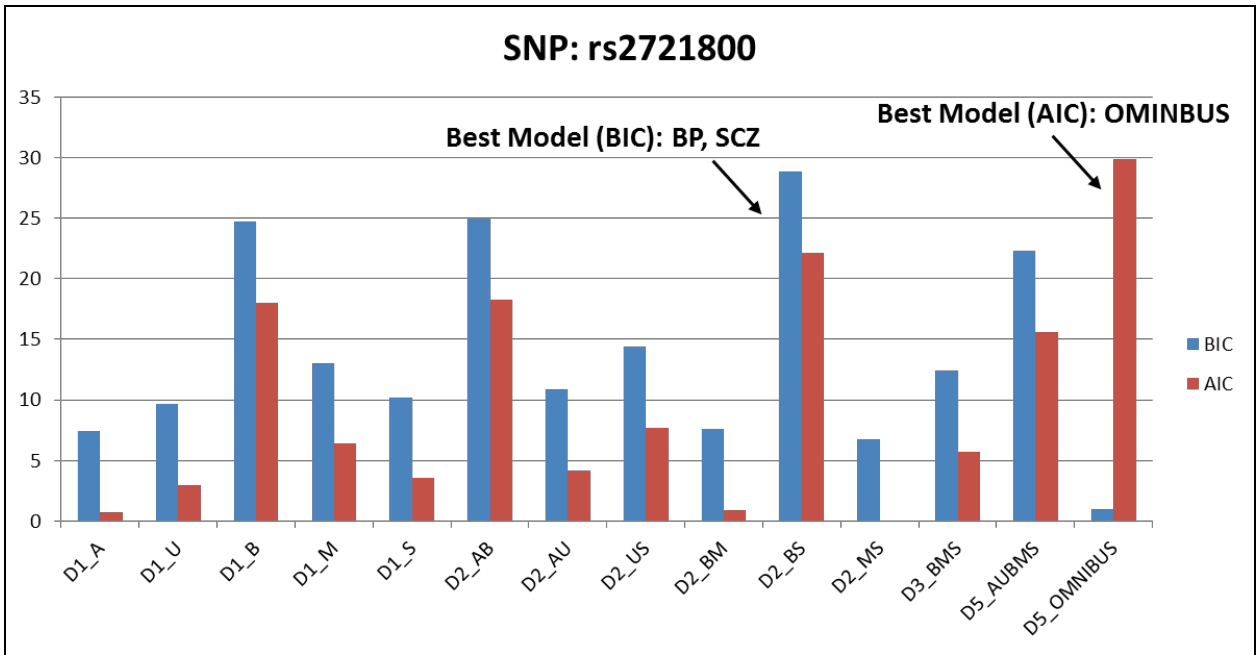

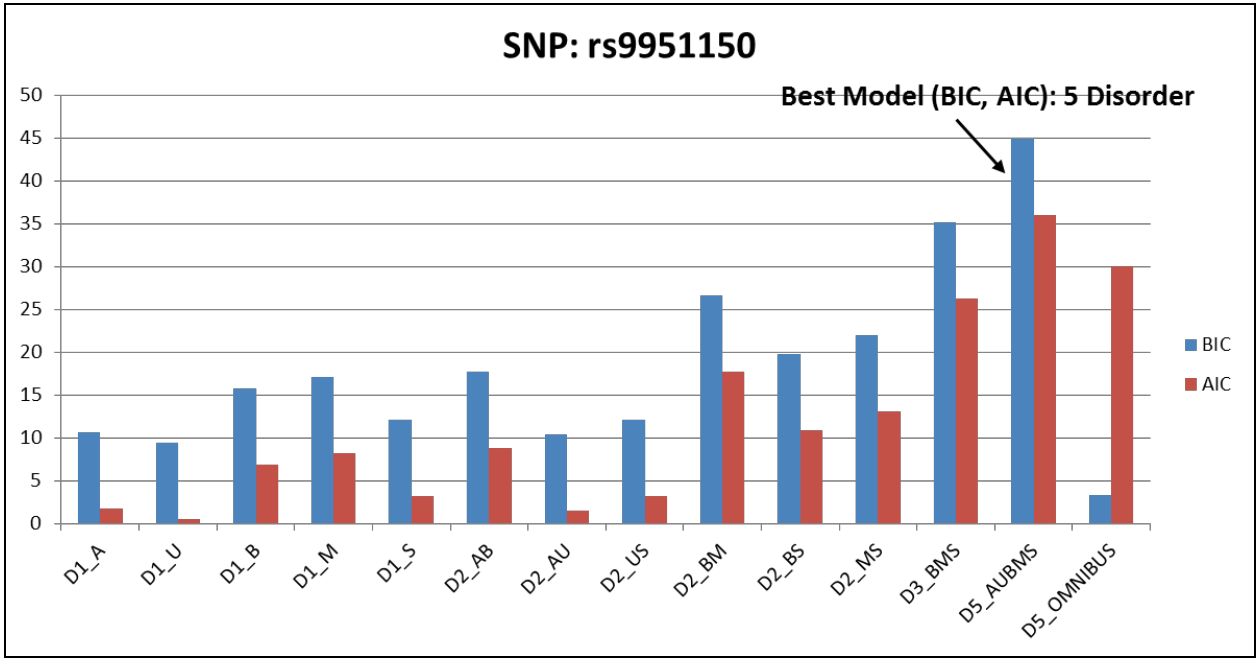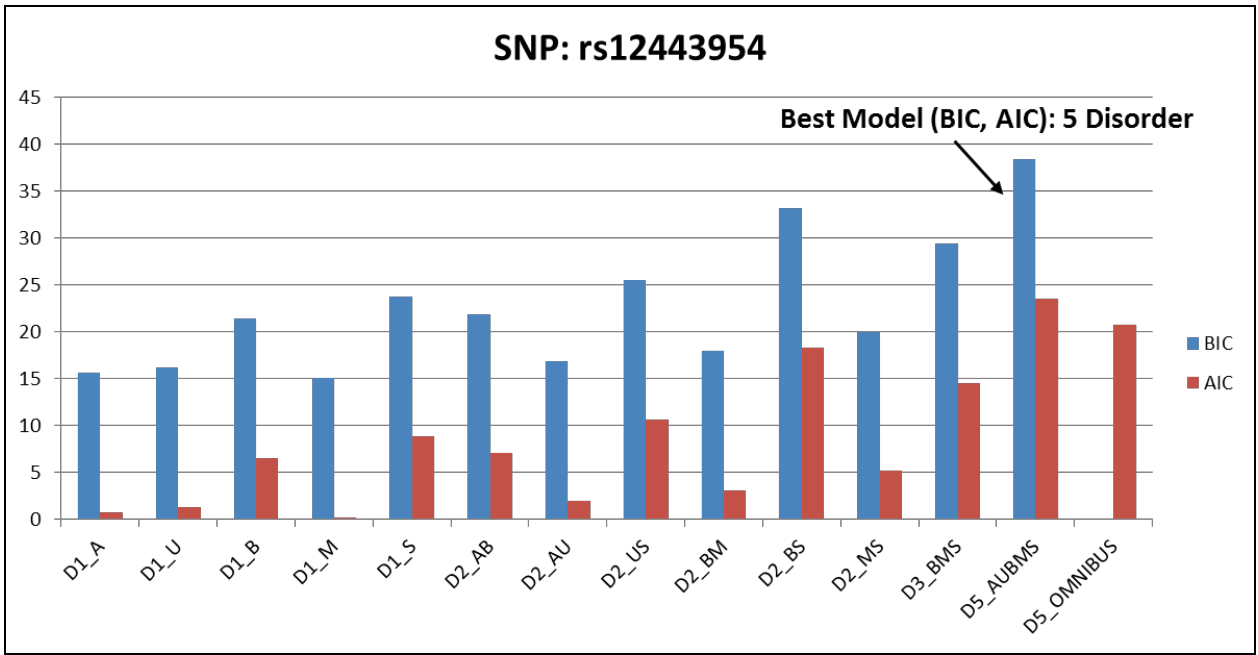

#### **XIV. Figure S6. BIC/AIC results and Forest Plots for SNPs Associated with BPD in Prior PGC Analyses**

Two information criterion measures of disease subtype models for 4 SNPs in regions with association  $p < 5 \times 10^{-8}$  in either the discovery or the combined PGC BP study [2]. Blue bar and red bar represent score differences across 21 models with respect to Bayesian information criterion (BIC) and Akaike information criterion (AIC) measures, respectively. X-axis represents 21 disease causal models, while Y-axis represents the relative difference in the information criterion score of each model compared to that of the highest score model (i.e., worst-fit model). For clarification, the best-fit model is marked by a circle in each plot. Note that the best-fit model could not be determined when the score difference between the best and the second-best model is at most 2. <sup>17</sup>

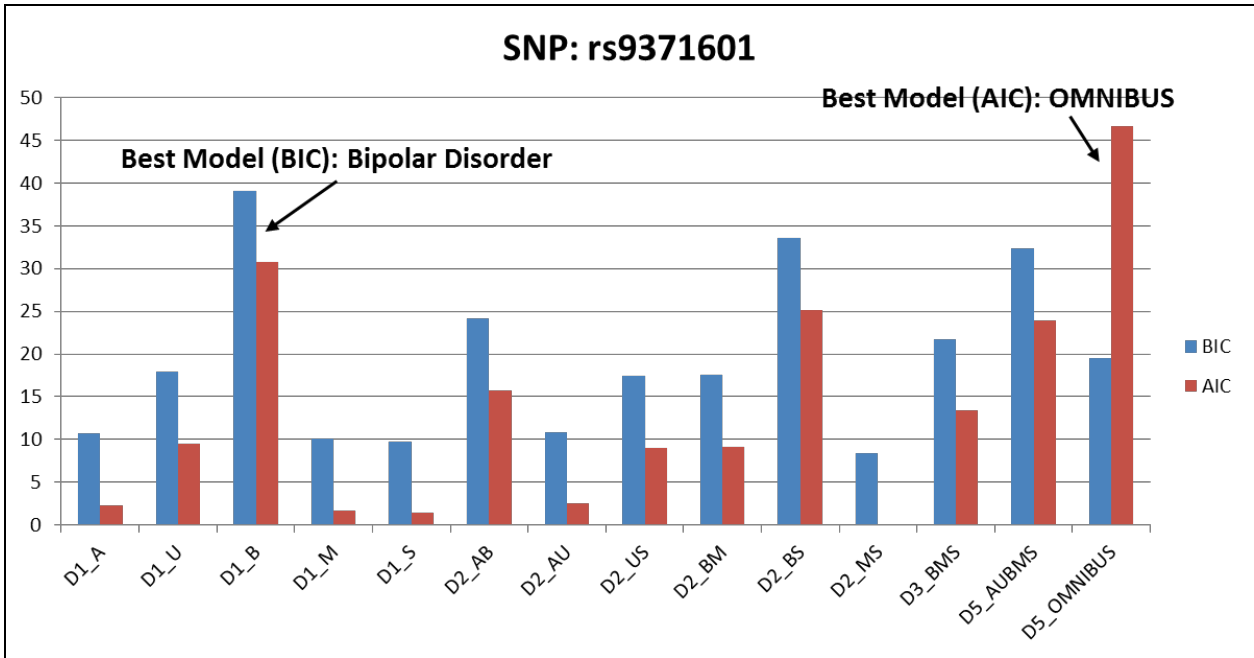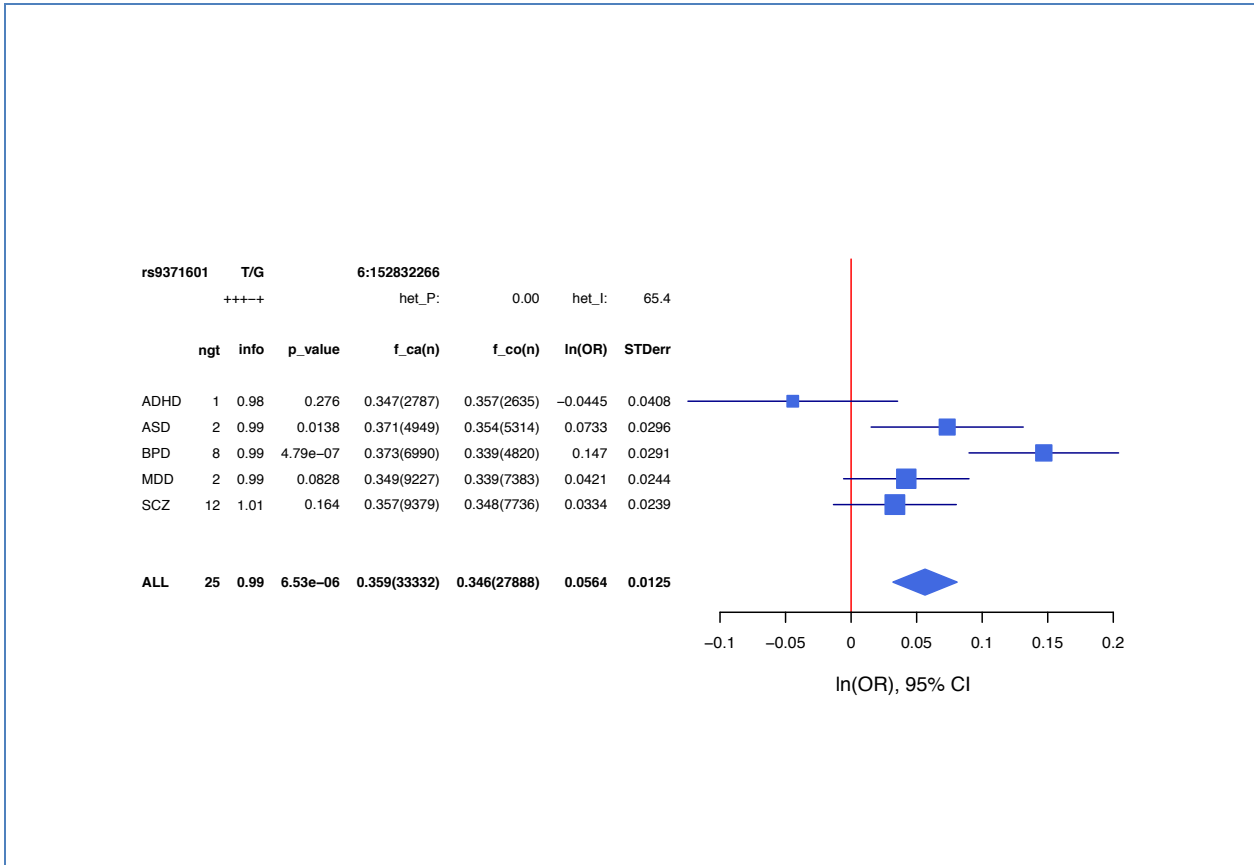



### SNP: rs10994397

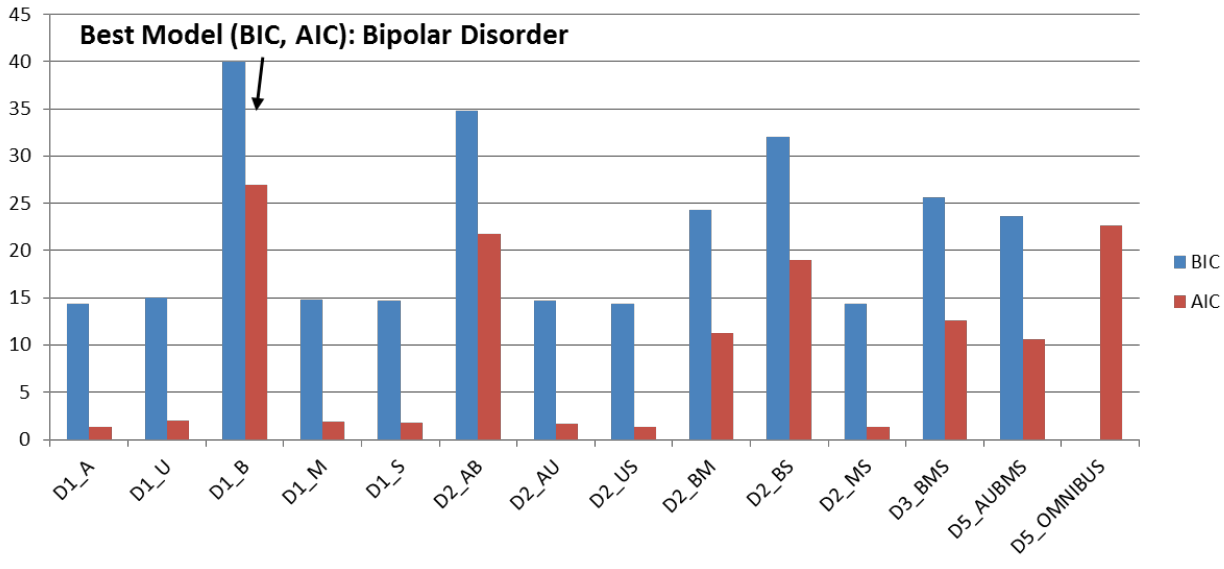

| ngt  | info | p_value | f_ca(n)  | f_co(n)     | ln(OR)      | STDerr         |
|------|------|---------|----------|-------------|-------------|----------------|
| ADHD | 2    | 1.03    | 0.62     | 0.065(2787) | 0.063(2635) | 0.0383 0.0778  |
| ASD  | 5    | 0.99    | 0.0819   | 0.069(4949) | 0.082(5314) | -0.095 0.0546  |
| BPD  | 3    | 0.99    | 2.02e-09 | 0.074(6990) | 0.054(4820) | 0.349 0.0582   |
| MDD  | 4    | 0.98    | 0.52     | 0.064(9227) | 0.065(7383) | -0.0306 0.0476 |
| SCZ  | 3    | 0.98    | 0.0243   | 0.067(9379) | 0.061(7736) | 0.108 0.048    |

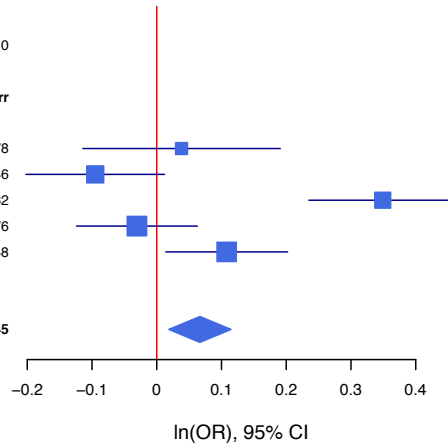

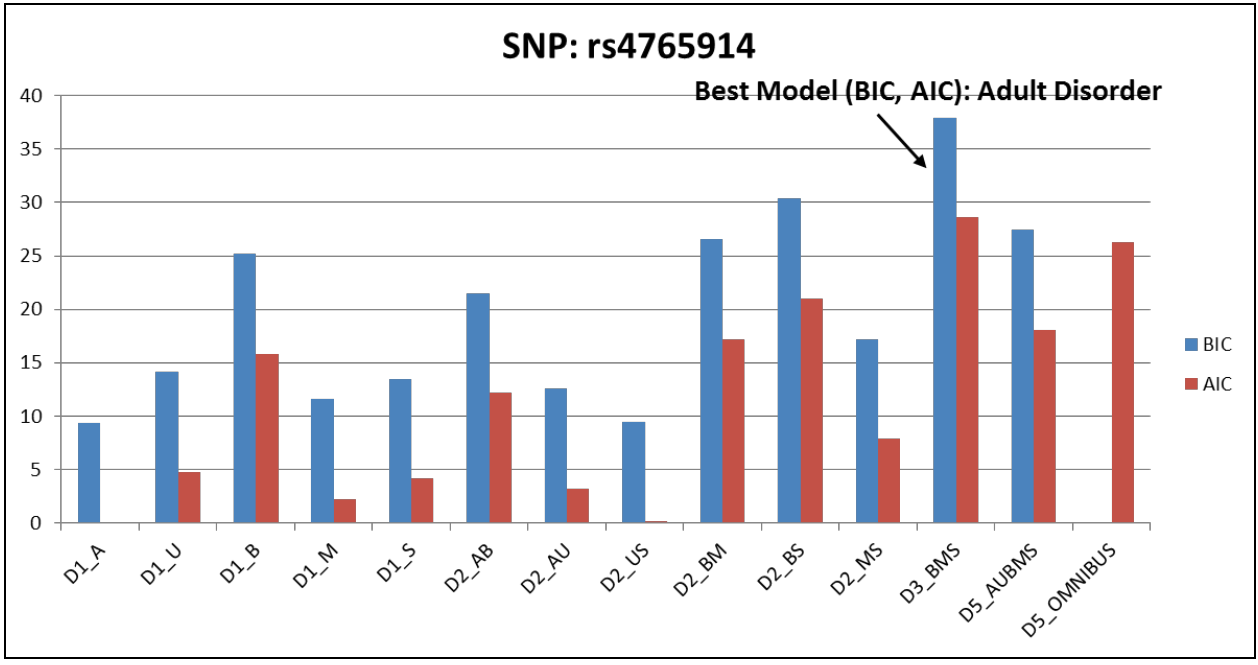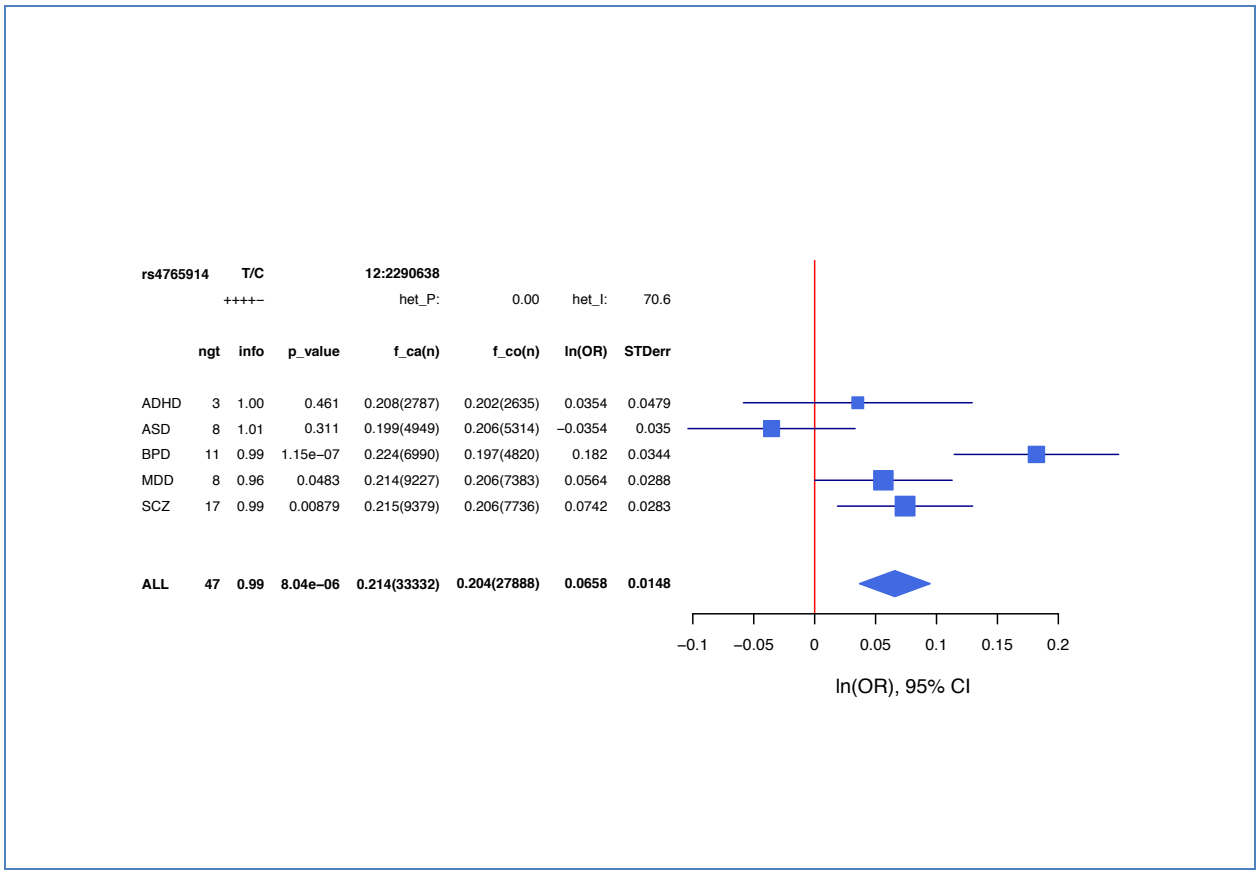

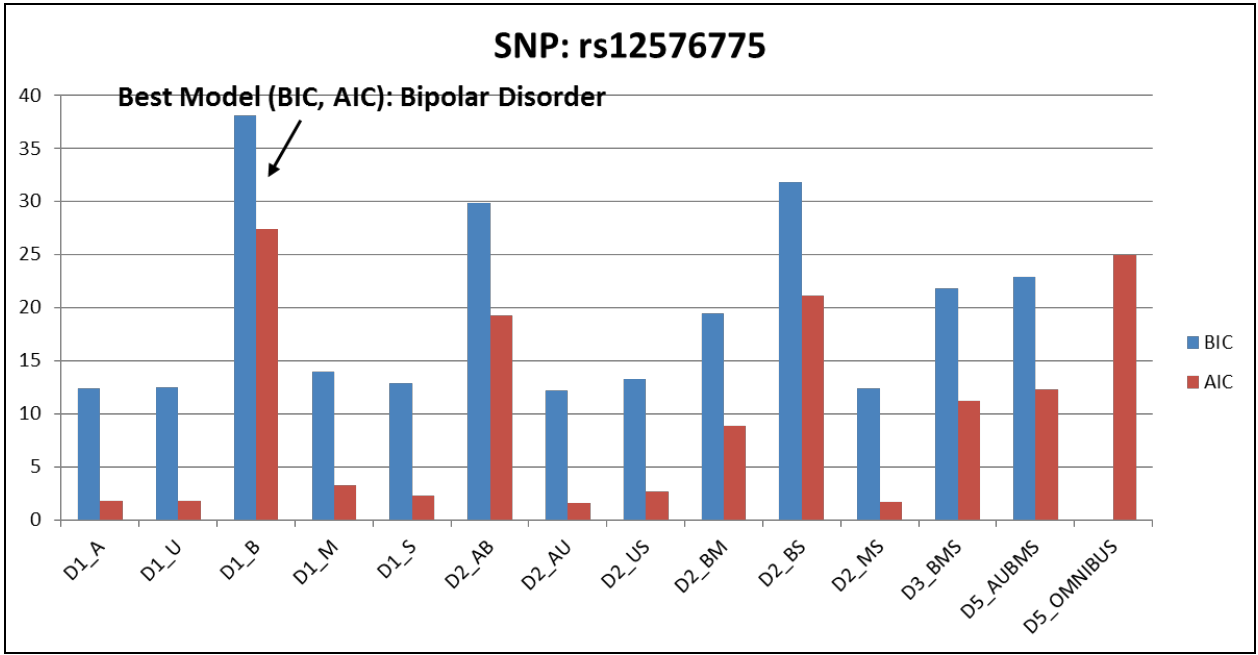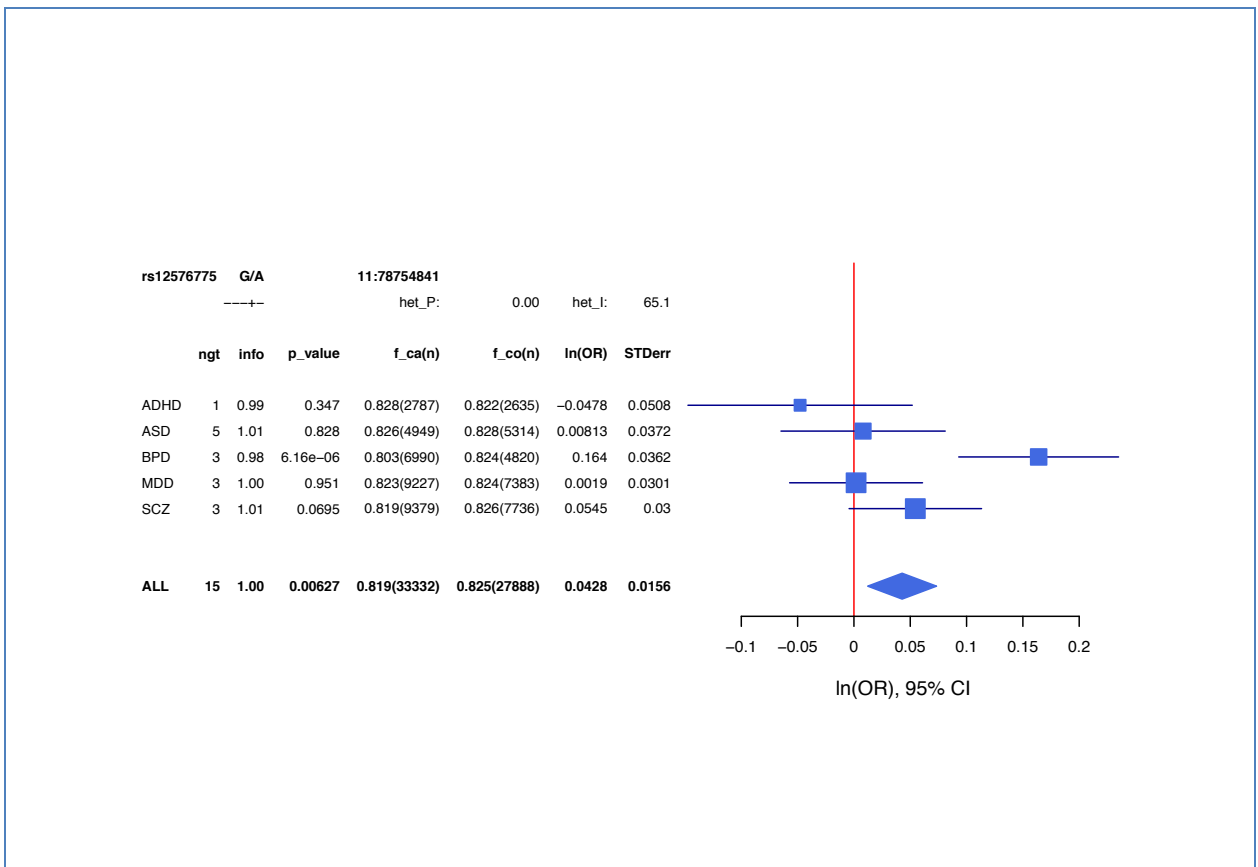

**Figure S7. BIC/AIC results and Forest Plots for SNPs Associated with SCZ in Prior PGC Analyses**

Two information criterion measures of disease subtype models for 10 SNPs in regions with the association  $p < 5 \times 10^{-8}$  in either the discovery or the combined PGC schizophrenia study [3]. Blue bar and red bar represent score differences across 21 models with respect to Bayesian information criterion (BIC) and Akaike information criterion (AIC) measures, respectively. X-axis represents 21 disease causal models, while Y-axis represents the relative difference in the information criterion score of each model compared to that of the highest score model (i.e., worst-fit model). For clarification, the best-fit model is marked by a circle in each plot. Note that the best-fit model could not be determined when the score difference between the best and the second-best model is at most 2. <sup>17</sup>

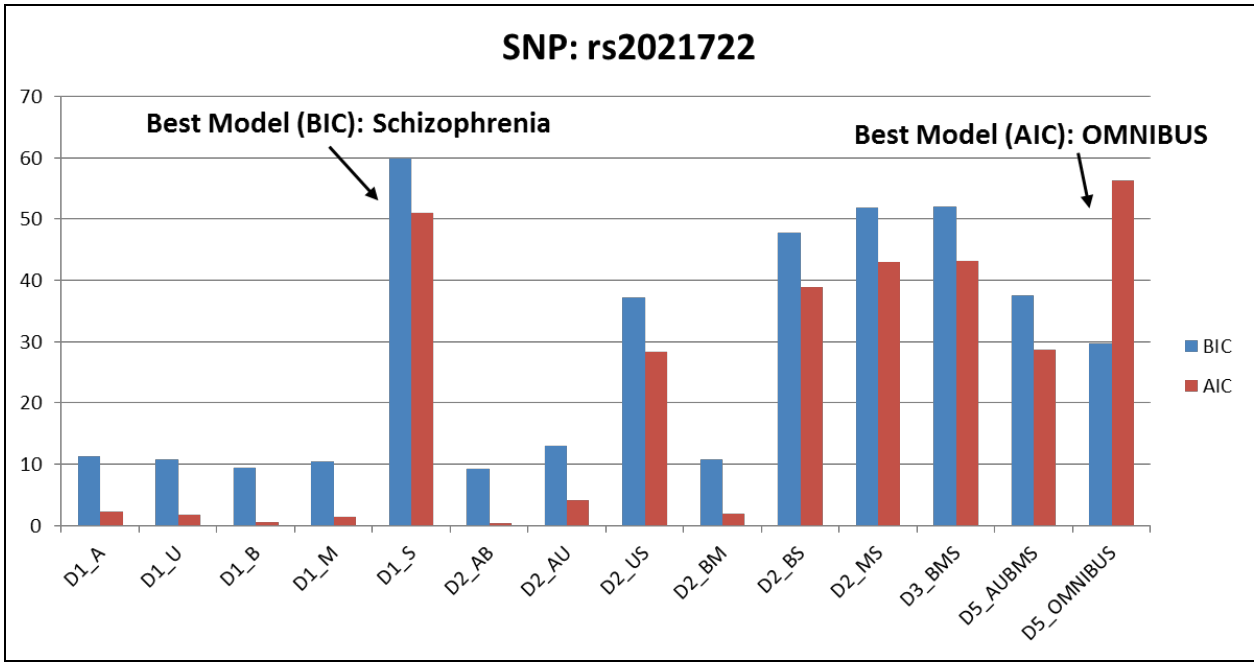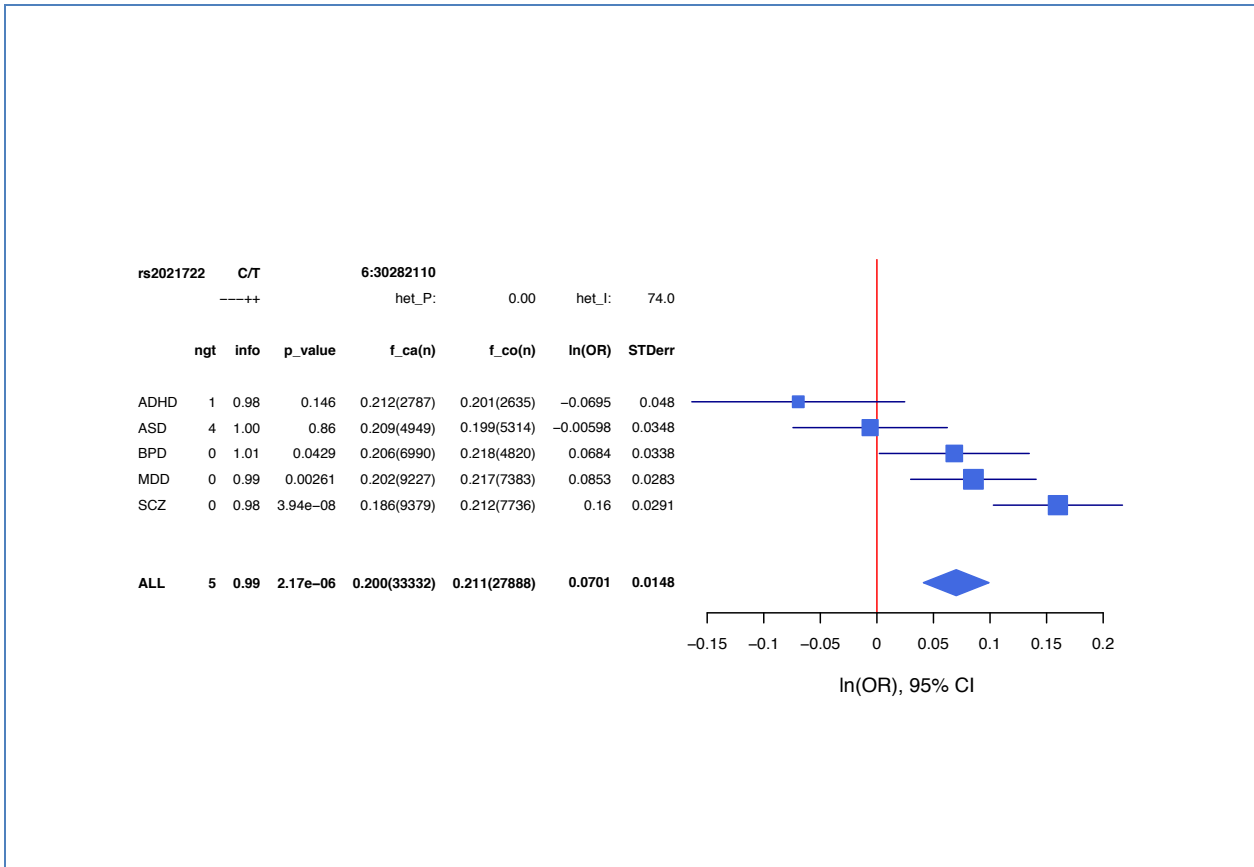

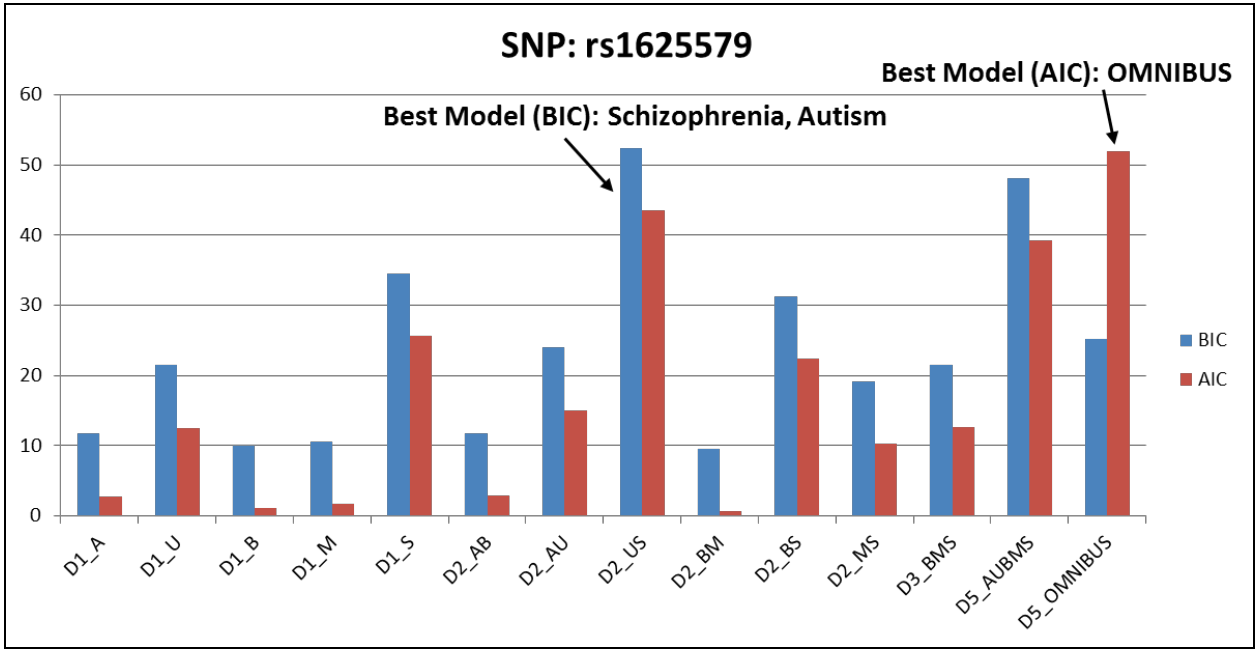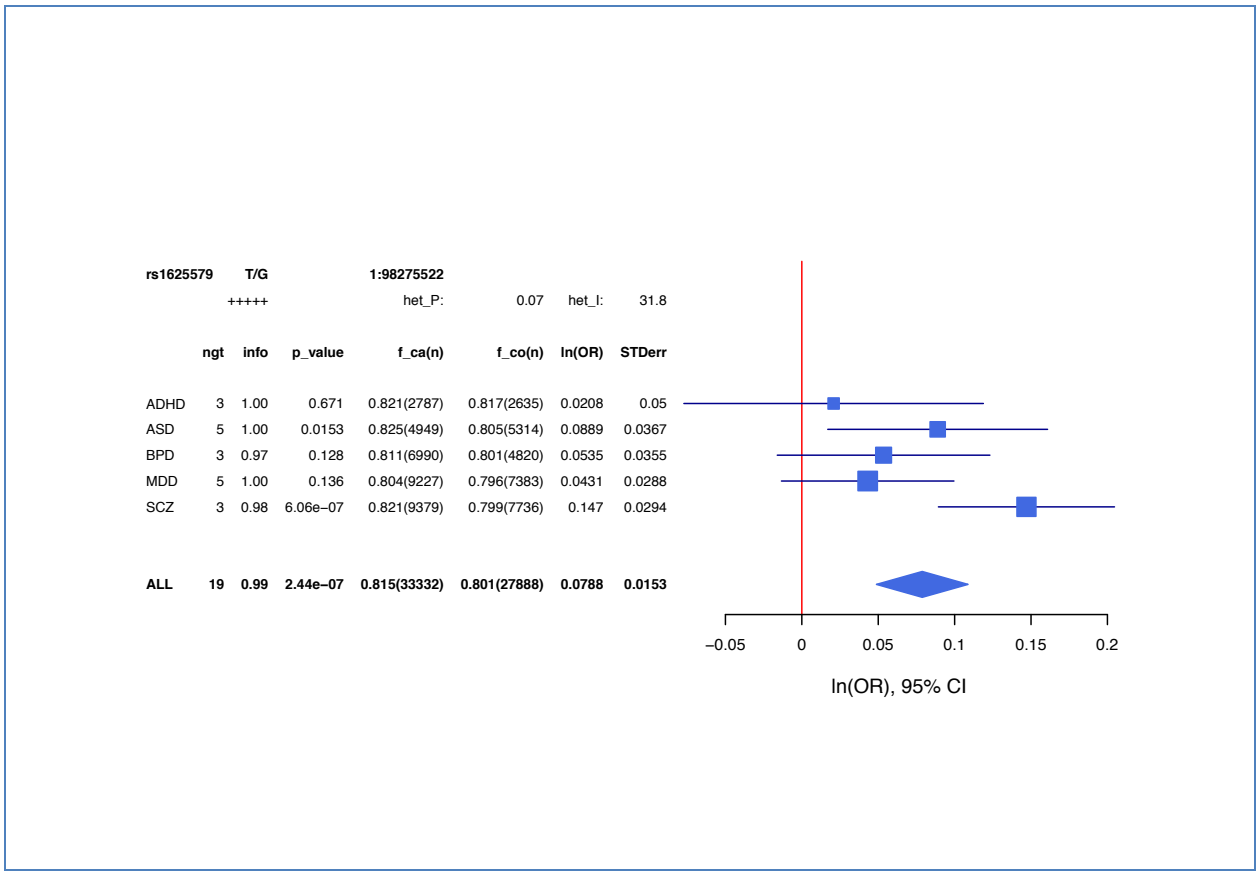

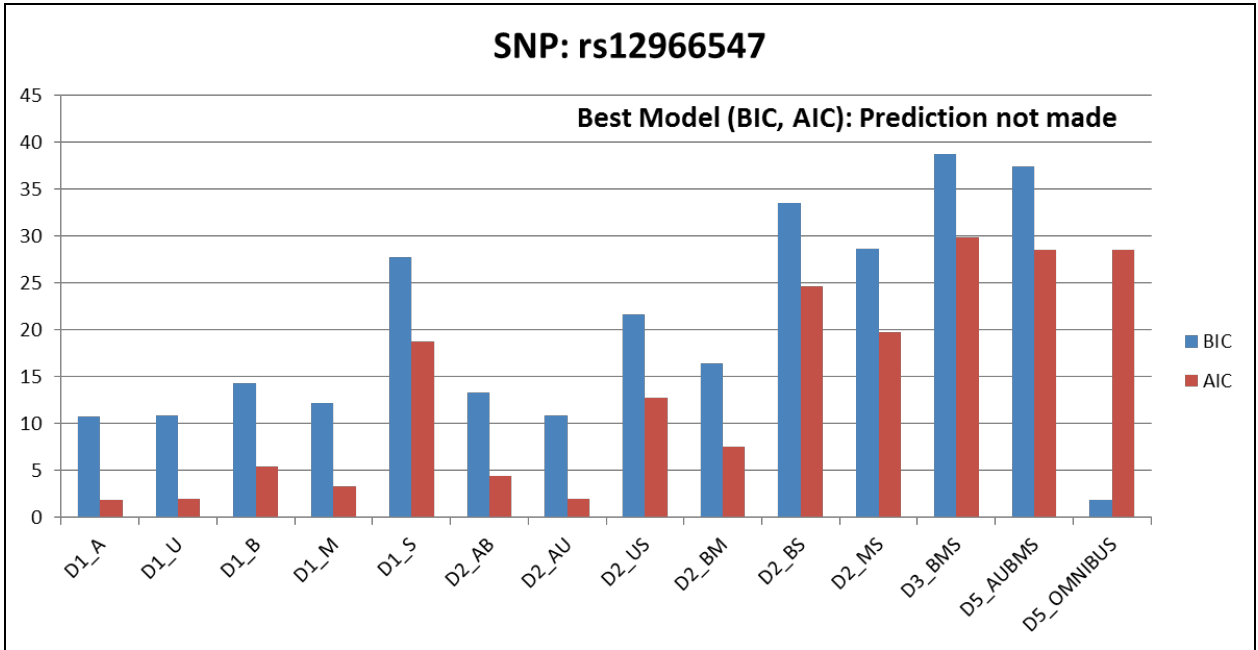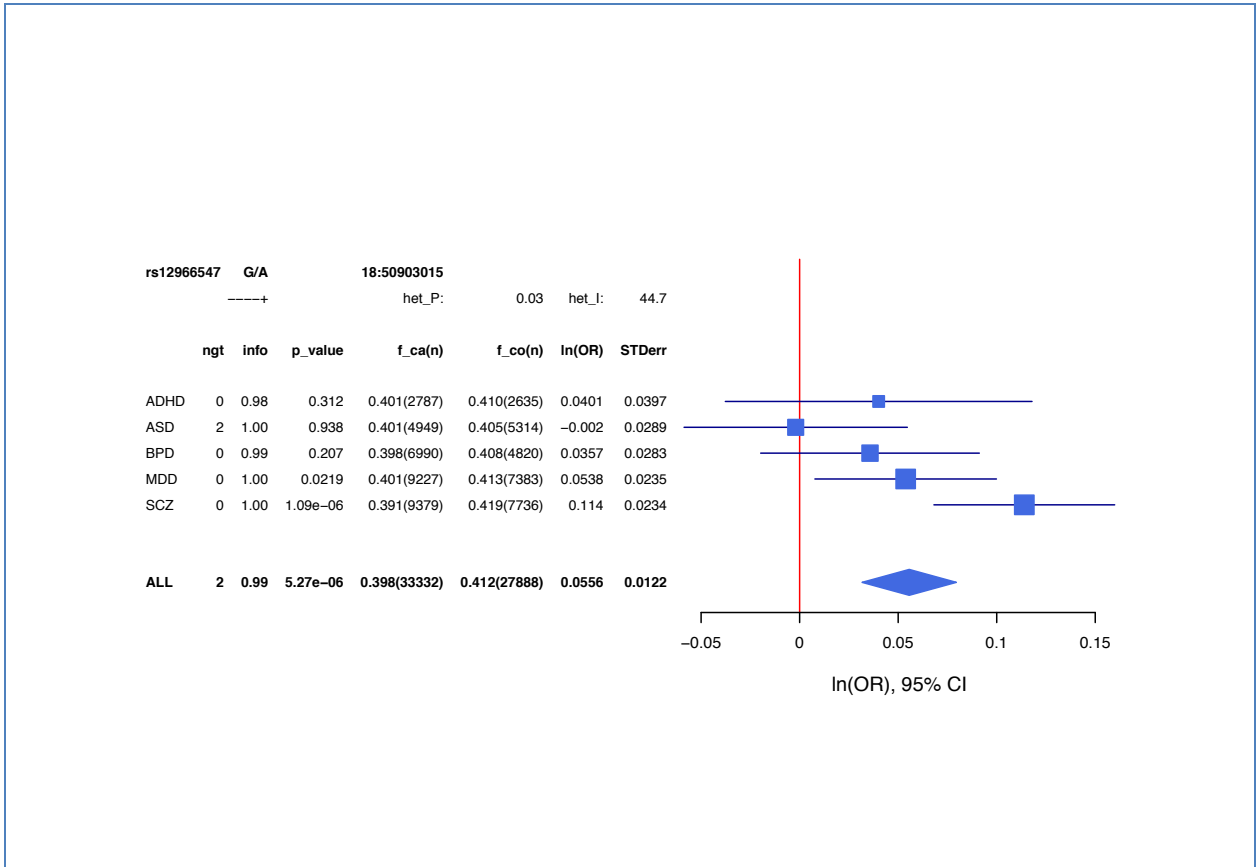

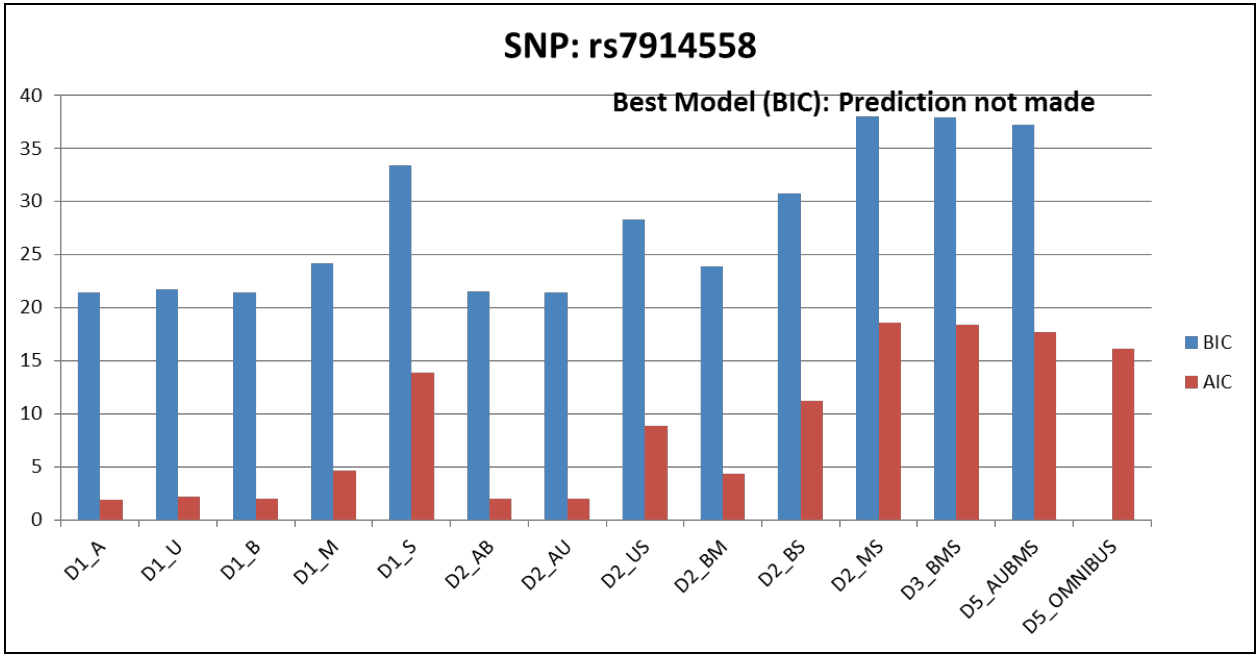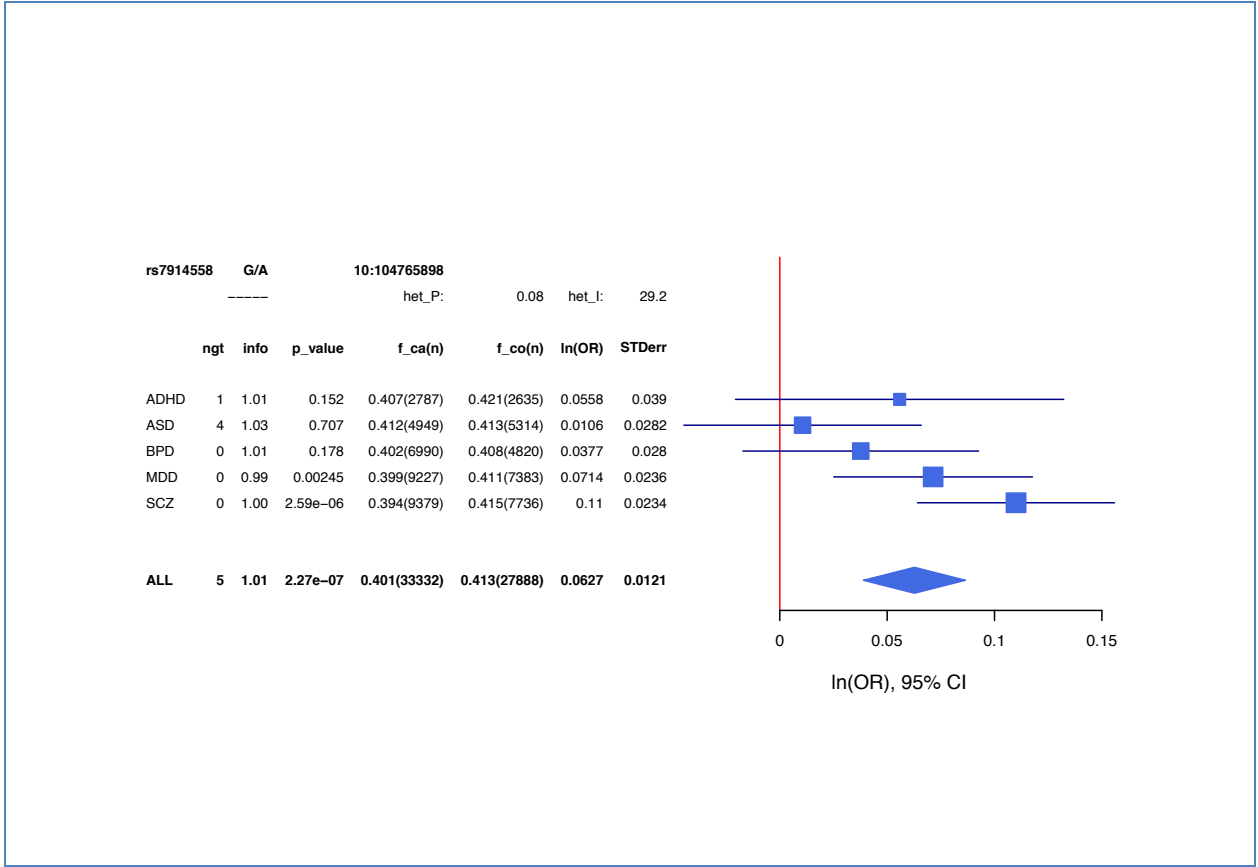



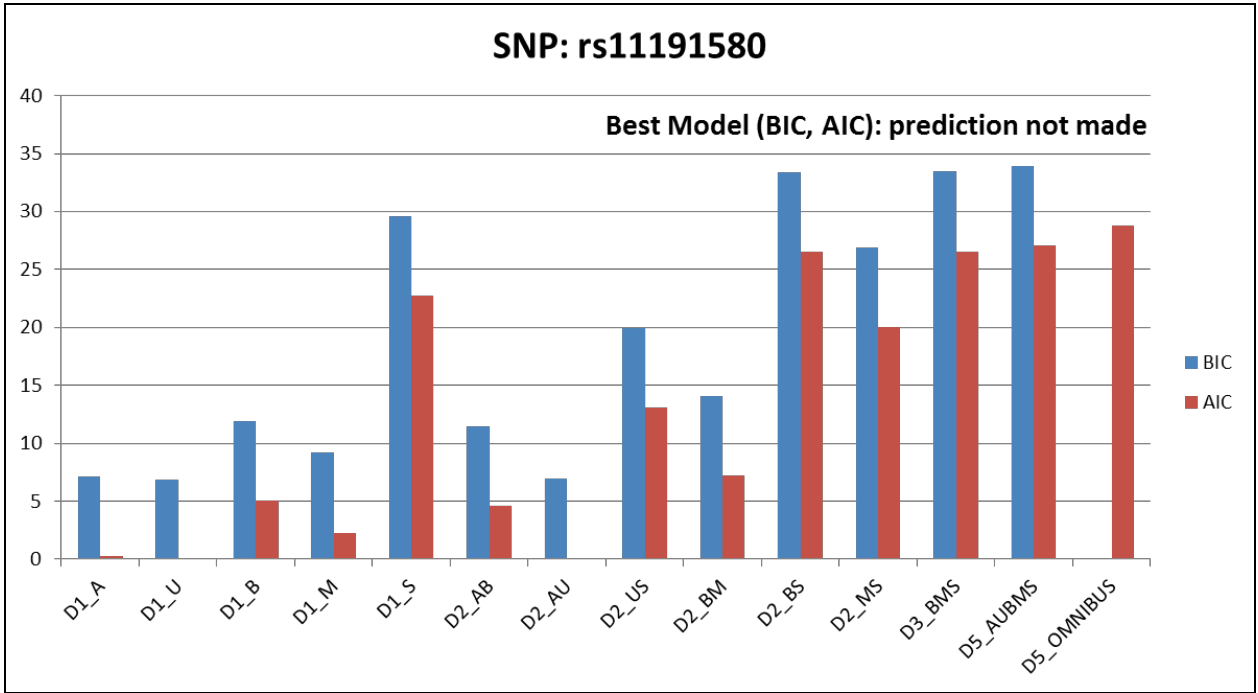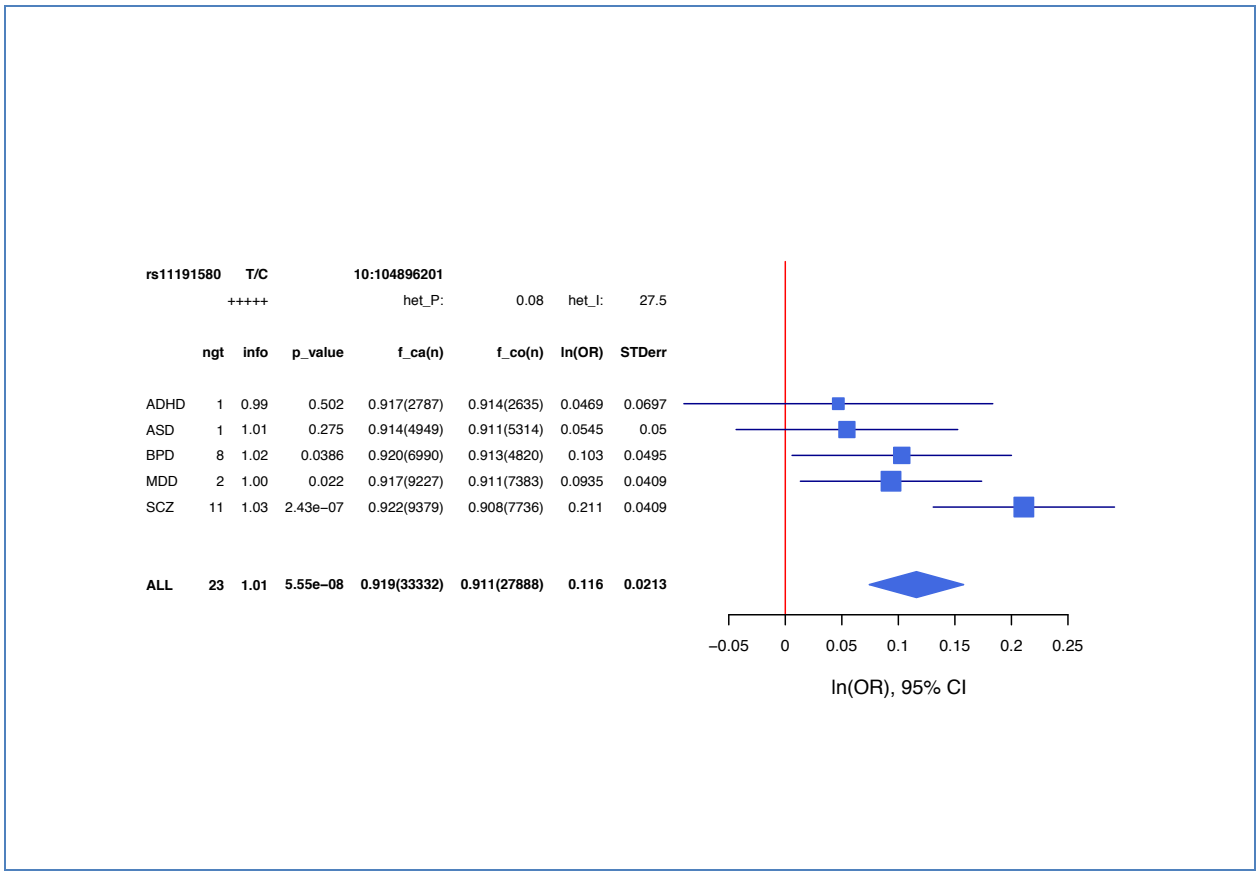

### SNP: rs7004633

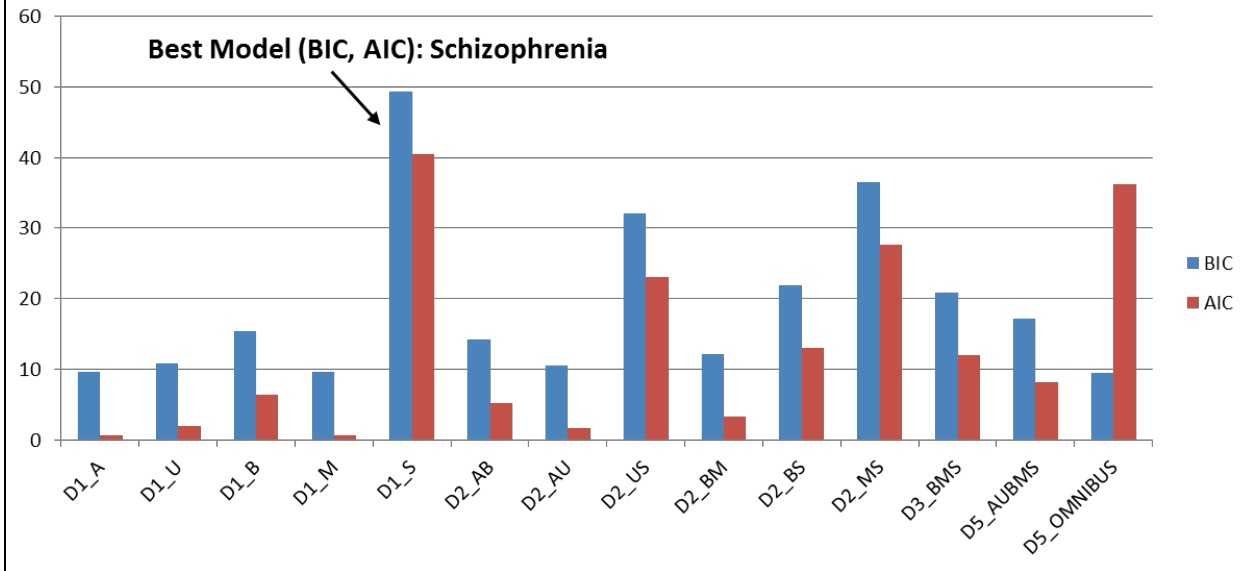

| ngt        | info      | p_value     | f_ca(n)        | f_co(n)             | ln(OR)              | STDerr       |               |
|------------|-----------|-------------|----------------|---------------------|---------------------|--------------|---------------|
| ADHD       | 2         | 0.96        | 0.807(2787)    | 0.812(2635)         | 0.0323              | 0.0502       |               |
| ASD        | 6         | 0.96        | 0.810(4949)    | 0.813(5314)         | 0.00391             | 0.0369       |               |
| BPD        | 3         | 0.92        | 0.821(6990)    | 0.817(4820)         | -0.0383             | 0.0375       |               |
| MDD        | 6         | 1.00        | 0.535          | 0.812(9227)         | 0.0185              | 0.0297       |               |
| SCZ        | 4         | 0.91        | 1.68e-08       | 0.796(9379)         | 0.819(7736)         | 0.173        | 0.0306        |
| <b>ALL</b> | <b>21</b> | <b>0.95</b> | <b>0.00227</b> | <b>0.809(33332)</b> | <b>0.816(27888)</b> | <b>0.048</b> | <b>0.0157</b> |

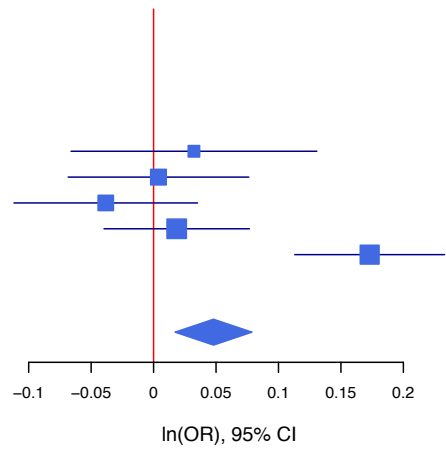

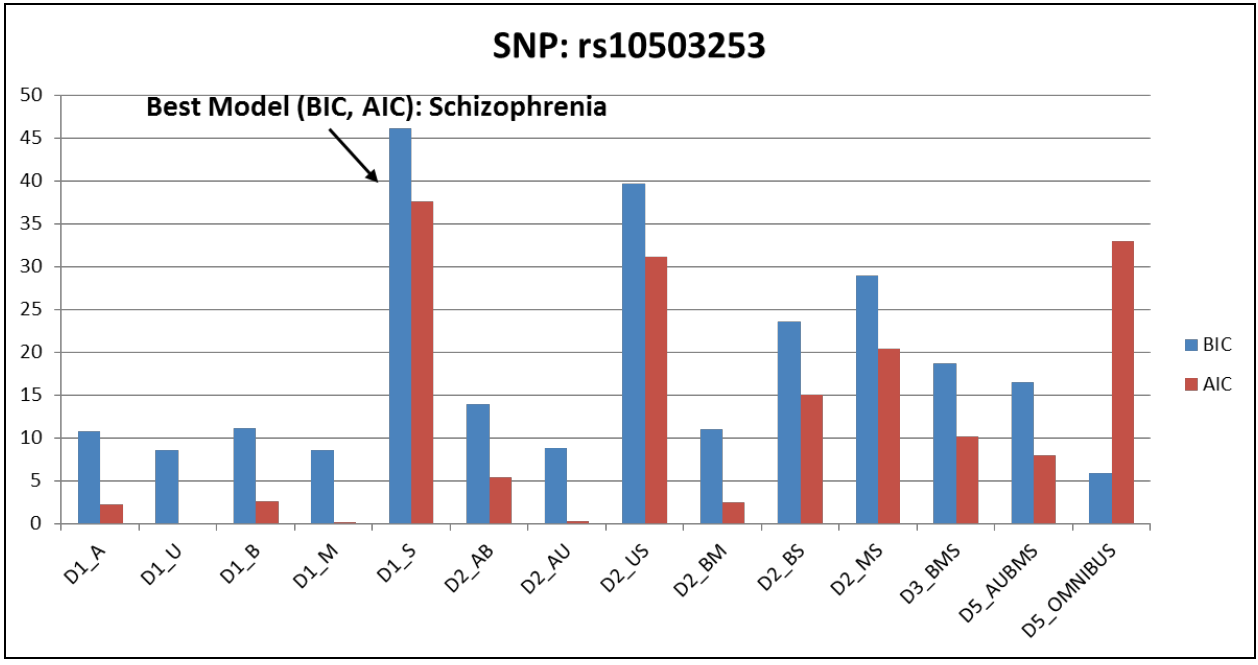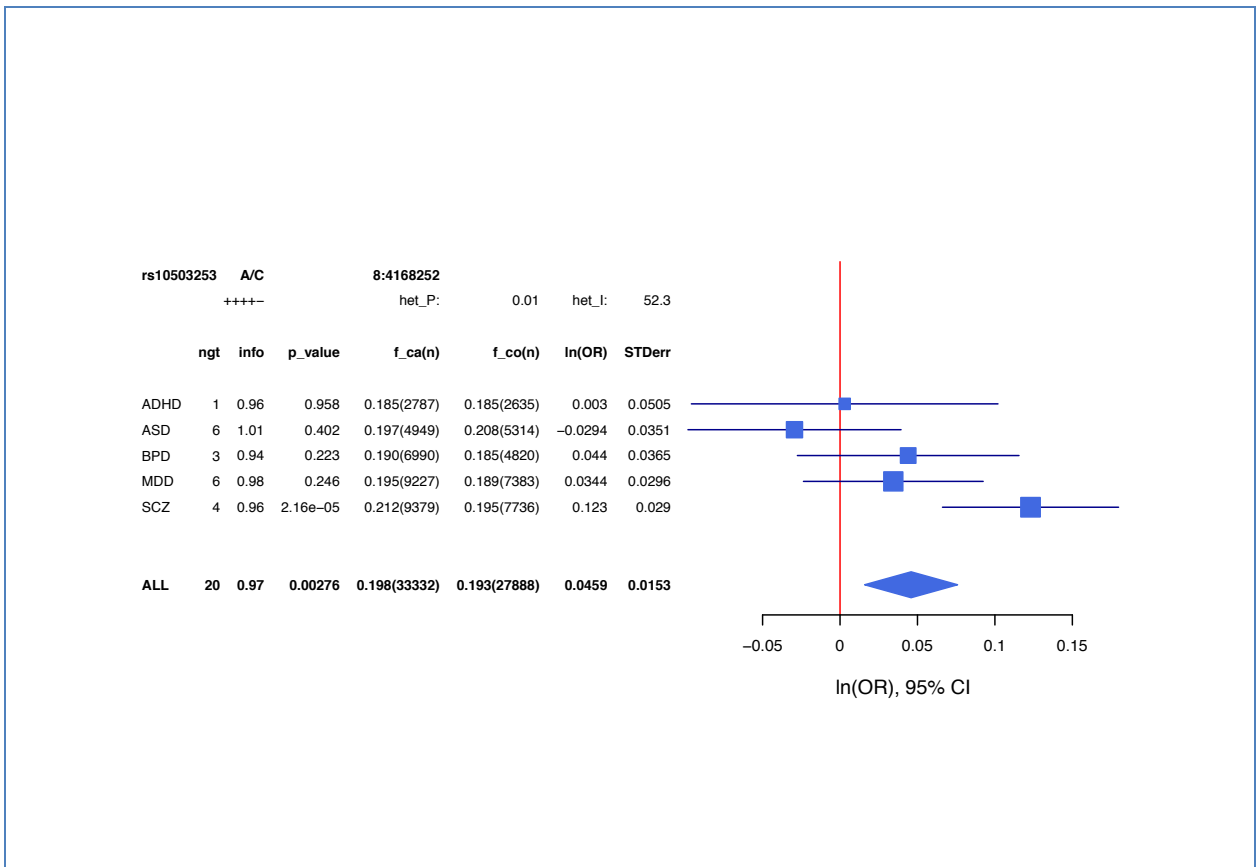

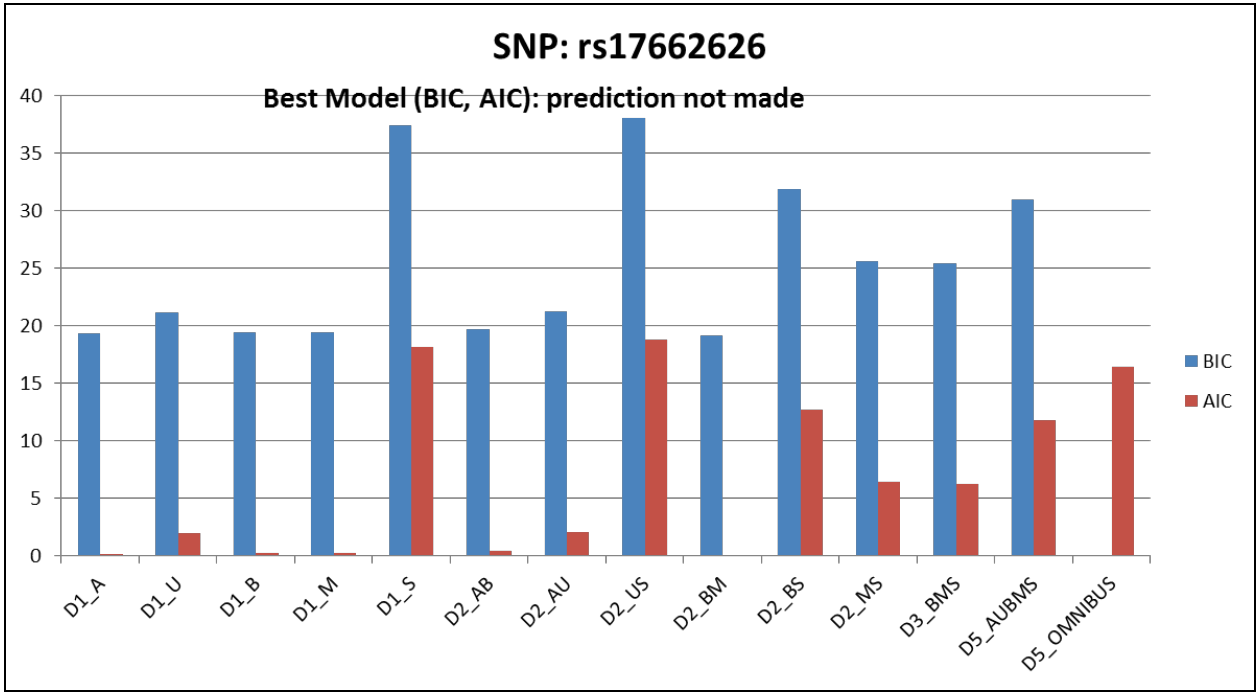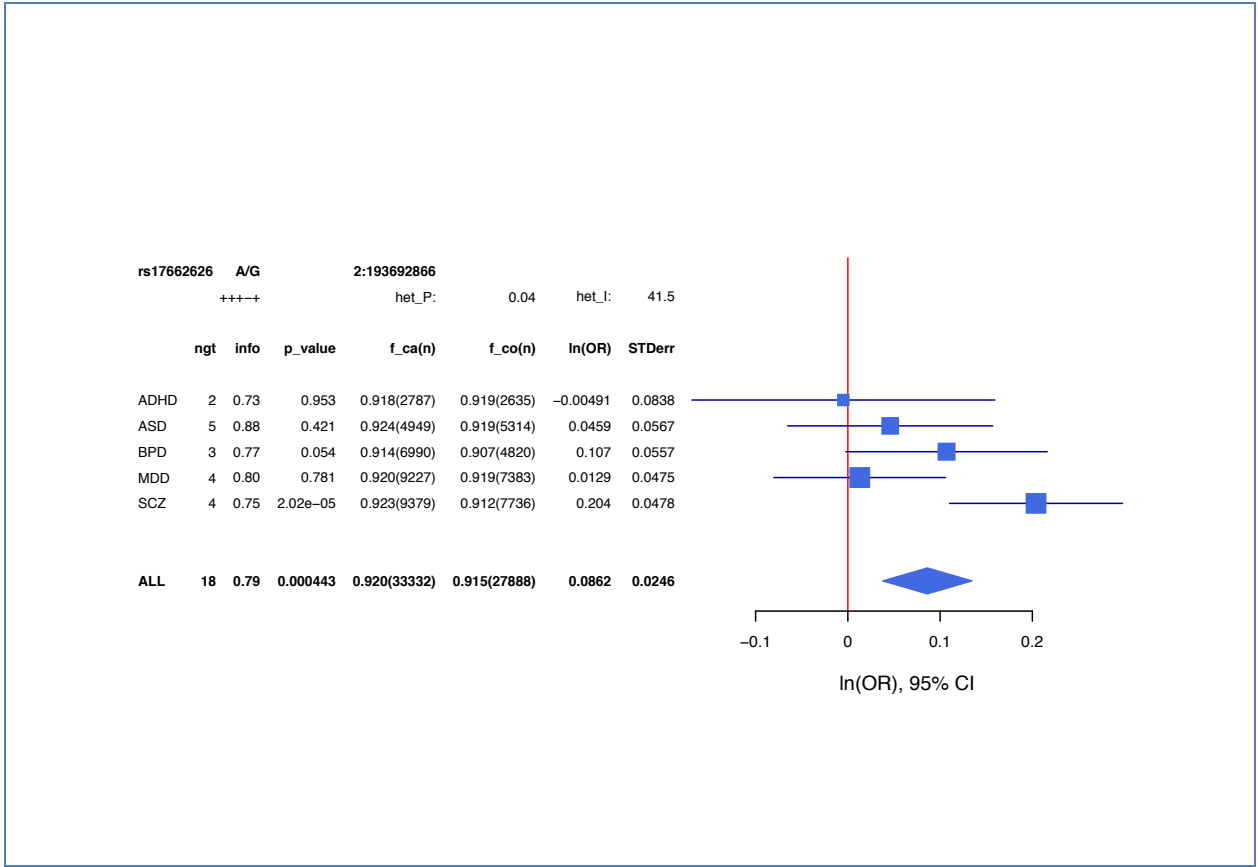

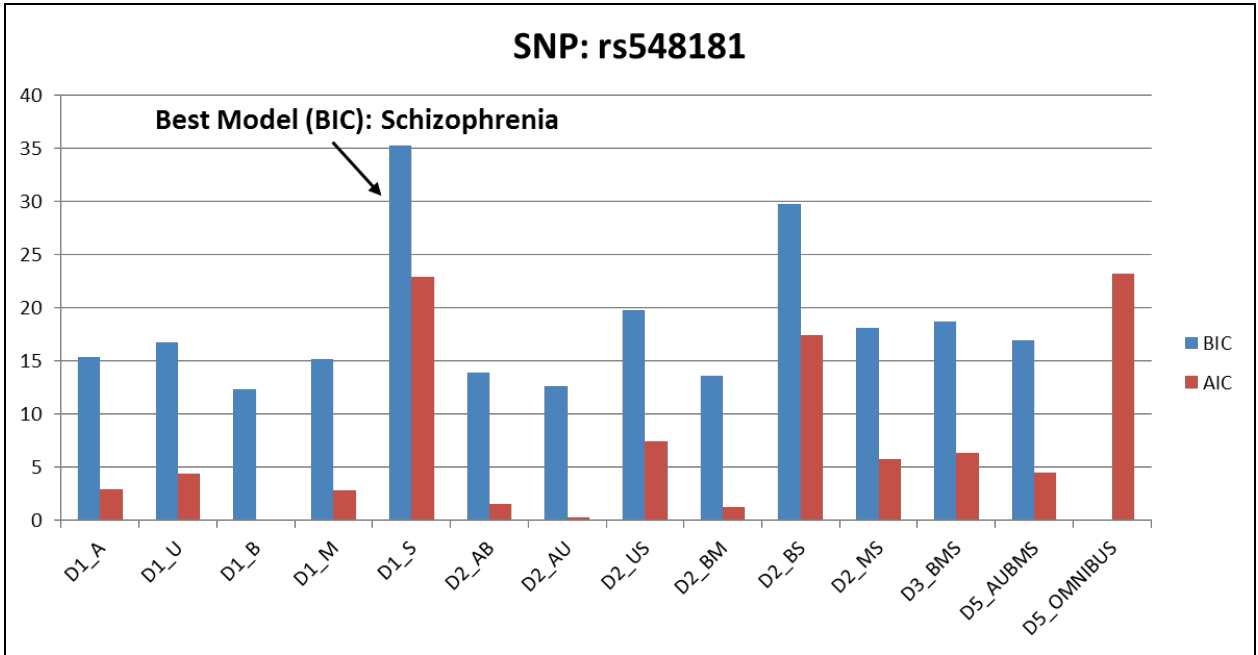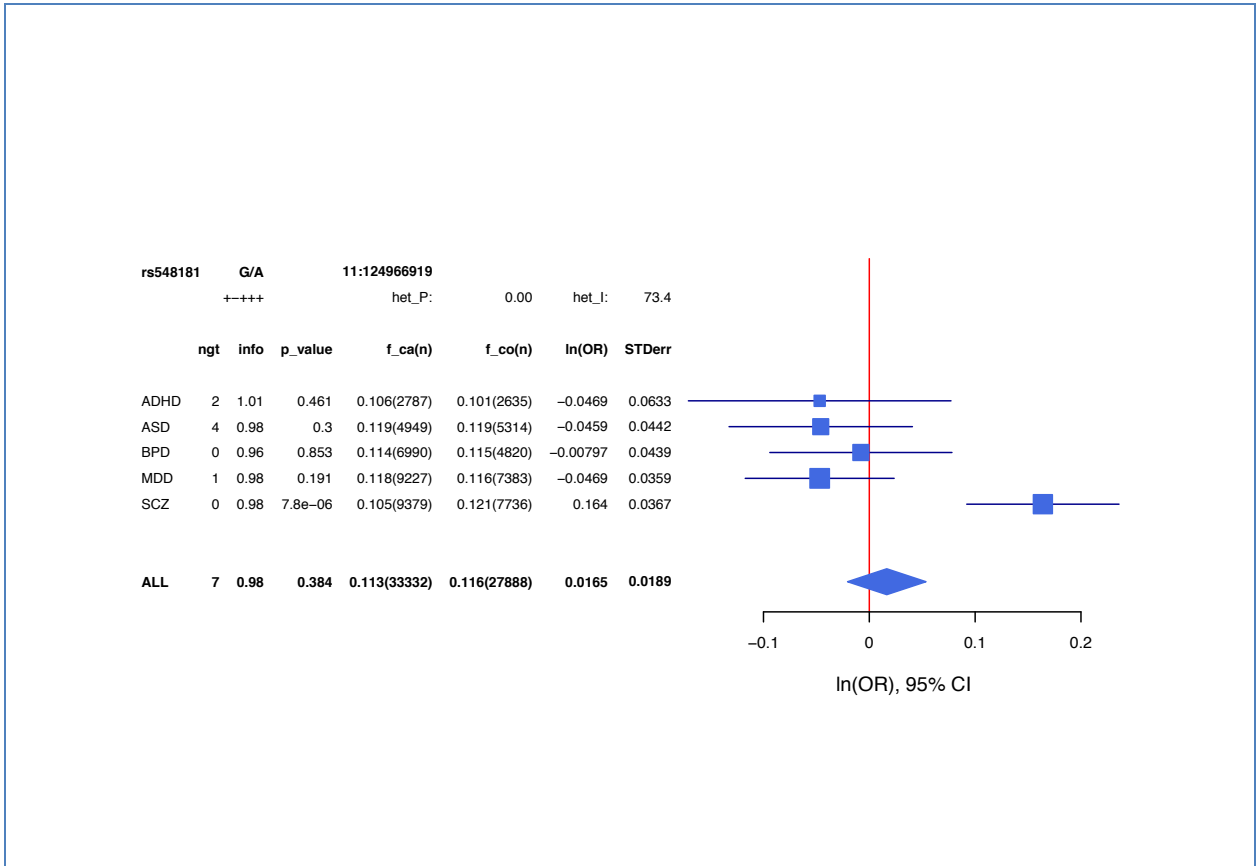

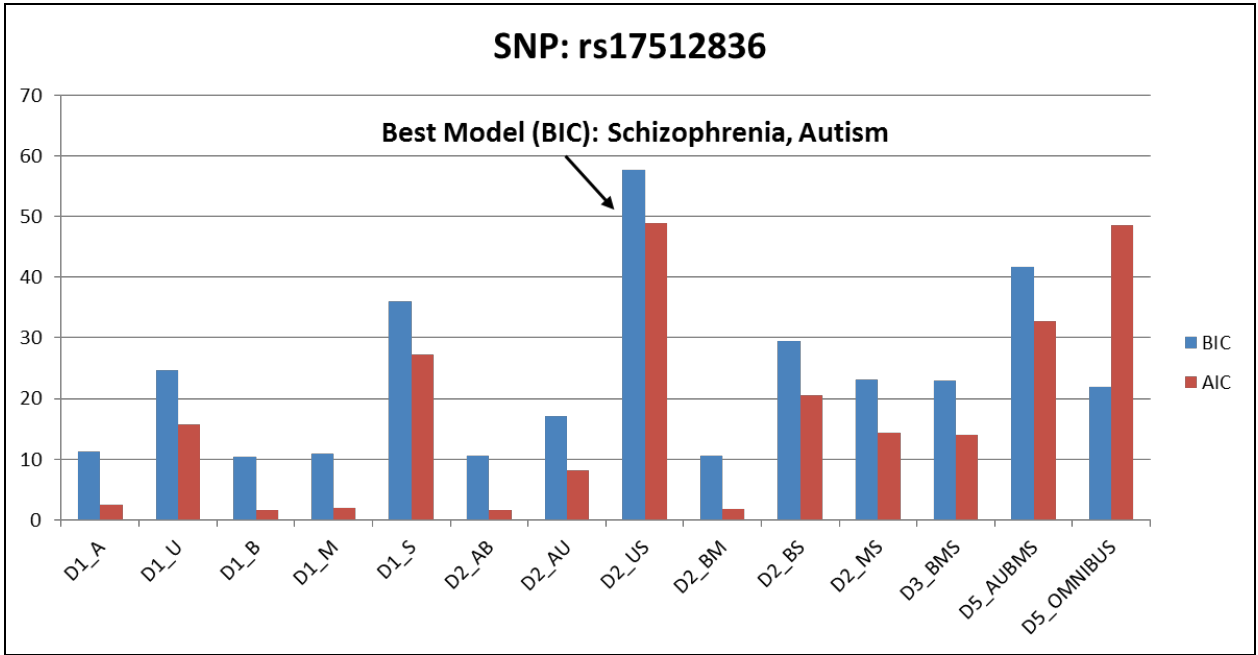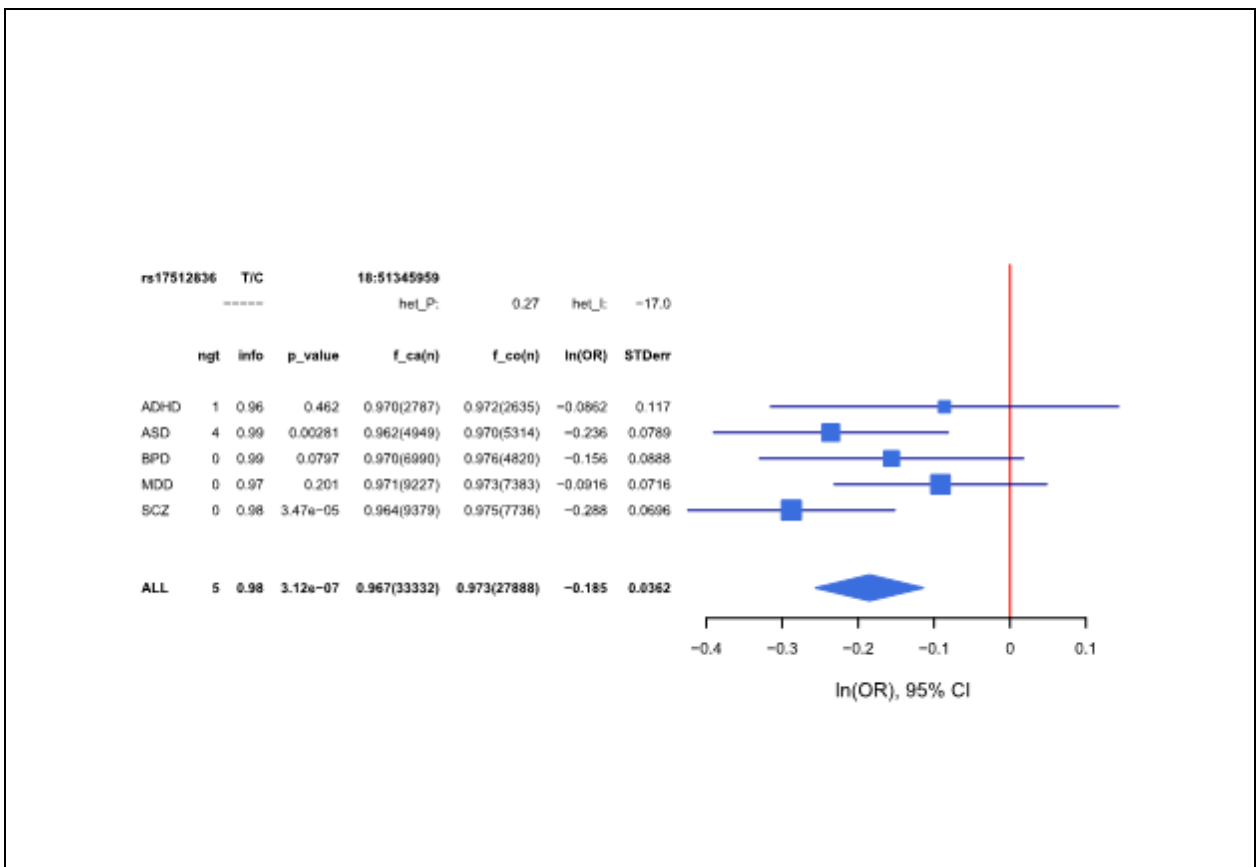



**XV. Table S5: Polygenic Risk Profiling Results**

| Disorder Pairs<br>(Discovery_Target) | Proportion of variance explained by association P thresholds (PT) |                      |                      |                      |                      |                      |                      |                      |                      |                      |
|--------------------------------------|-------------------------------------------------------------------|----------------------|----------------------|----------------------|----------------------|----------------------|----------------------|----------------------|----------------------|----------------------|
|                                      | 0.0001                                                            | 0.001                | 0.01                 | 0.05                 | 0.1                  | 0.2                  | 0.3                  | 0.4                  | 0.5                  | 1                    |
| ADHD_AS                              | ---                                                               | ---                  | ---                  | ---                  | ---                  | ---                  | ---                  | ---                  | ---                  | ---                  |
| ADHD_BPD                             | ---                                                               | ---                  | ---                  | ---                  | ---                  | ---                  | ---                  | ---                  | ---                  | ---                  |
| ADHD_MDD                             | ---                                                               | ---                  | ---                  | ---                  | ---                  | ---                  | ---                  | ---                  | ---                  | ---                  |
| ADHD_SCZ                             | ---                                                               | ---                  | ---                  | ---                  | ---                  | ---                  | ---                  | ---                  | ---                  | ---                  |
| ASD_ADHD                             | ---                                                               | ---                  | ---                  | ---                  | ---                  | ---                  | ---                  | ---                  | ---                  | ---                  |
| ASD_BPD                              | ---                                                               | ---                  | 0.00042 <sup>q</sup> | 0.00084 <sup>a</sup> | 0.00050 <sup>a</sup> | 0.00056 <sup>a</sup> | 0.00064 <sup>a</sup> | 0.00068 <sup>a</sup> | 0.00067 <sup>a</sup> | 0.00065 <sup>a</sup> |
| ASD_MDD                              | ---                                                               | 0.00035 <sup>a</sup> | 0.00049 <sup>q</sup> | ---                  | ---                  | ---                  | ---                  | ---                  | ---                  | ---                  |
| ASD_SCZ                              | ---                                                               | ---                  | 0.00042 <sup>q</sup> | 0.0012 <sup>b</sup>  | 0.0011 <sup>a</sup>  | 0.0010 <sup>a</sup>  | 0.0012               | 0.0013               | 0.0013               | 0.0011 <sup>a</sup>  |
| BPD_ADHD                             | 0.0018 <sup>a</sup>                                               | ---                  | 0.0017 <sup>q</sup>  | ---                  | ---                  | ---                  | ---                  | ---                  | ---                  | ---                  |
| BPD_AS                               | ---                                                               | ---                  | ---                  | ---                  | ---                  | 0.00073 <sup>a</sup> | 0.00069 <sup>a</sup> | 0.00077 <sup>a</sup> | 0.00068 <sup>a</sup> | 0.00063 <sup>a</sup> |
| BPD_MDD                              | 0.0010 <sup>a</sup>                                               | 0.0010 <sup>a</sup>  | 0.0030 <sup>c</sup>  | 0.0039 <sup>d</sup>  | 0.0041 <sup>d</sup>  | 0.0039 <sup>d</sup>  | 0.0042 <sup>d</sup>  | 0.0047 <sup>d</sup>  | 0.0048 <sup>d</sup>  | 0.0049 <sup>d</sup>  |
| BPD_SCZ                              | 0.0020 <sup>b</sup>                                               | 0.0048 <sup>d</sup>  | 0.012 <sup>e</sup>   | 0.017 <sup>f</sup>   | 0.021 <sup>f</sup>   | 0.021 <sup>f</sup>   | 0.022 <sup>f</sup>   | 0.021 <sup>f</sup>   | 0.021 <sup>f</sup>   | 0.021 <sup>f</sup>   |
| MDD_ADHD                             | ---                                                               | ---                  | ---                  | ---                  | ---                  | ---                  | ---                  | ---                  | ---                  | ---                  |
| MDD_AS                               | ---                                                               | ---                  | ---                  | ---                  | ---                  | ---                  | ---                  | ---                  | ---                  | ---                  |
| MDD_BPD                              | ---                                                               | 0.00054 <sup>q</sup> | 0.0019 <sup>b</sup>  | 0.0040 <sup>c</sup>  | 0.0051 <sup>c</sup>  | 0.0056 <sup>d</sup>  | 0.0056 <sup>d</sup>  | 0.0061 <sup>d</sup>  | 0.0062 <sup>d</sup>  | 0.00067 <sup>d</sup> |
| MDD_SCZ                              | ---                                                               | 0.00032 <sup>q</sup> | 0.0038 <sup>e</sup>  | 0.0081 <sup>e</sup>  | 0.0089 <sup>e</sup>  | 0.0094 <sup>e</sup>  | 0.0097 <sup>e</sup>  | 0.010 <sup>e</sup>   | 0.010 <sup>e</sup>   | 0.011 <sup>e</sup>   |
| SCZ_ADHD                             | ---                                                               | ---                  | ---                  | ---                  | ---                  | ---                  | ---                  | ---                  | ---                  | ---                  |
| SCZ_AS                               | ---                                                               | 0.0015 <sup>q</sup>  | ---                  | 0.00078 <sup>a</sup> | 0.00091 <sup>a</sup> | 0.00076 <sup>a</sup> | 0.00075 <sup>a</sup> | 0.00075 <sup>a</sup> | 0.00069 <sup>a</sup> | 0.00071 <sup>a</sup> |
| SCZ_BPD                              | 0.0044 <sup>c</sup>                                               | 0.0065 <sup>d</sup>  | 0.015 <sup>e</sup>   | 0.023 <sup>e</sup>   | 0.024 <sup>e</sup>   | 0.025 <sup>f</sup>   | 0.024 <sup>e</sup>   | 0.024 <sup>e</sup>   | 0.025 <sup>f</sup>   | 0.025 <sup>f</sup>   |
| SCZ_MDD                              | 0.00059 <sup>a</sup>                                              | 0.0016 <sup>b</sup>  | 0.0056 <sup>e</sup>  | 0.0068 <sup>e</sup>  | 0.0070 <sup>e</sup>  | 0.0072 <sup>e</sup>  | 0.0080 <sup>e</sup>  | 0.0089 <sup>e</sup>  | 0.0090 <sup>e</sup>  | 0.0091 <sup>e</sup>  |

Superscript letters indicate statistical significance for analysis, with a through f corresponding to values of  $p < 0.05$ ,  $10^{-4}$ ,  $10^{-8}$ ,  $10^{-12}$ ,  $10^{-16}$ , and  $10^{-50}$ , respectively.



I. **XVI. Figure S8: Polygenic Risk Profiling for Combined Discovery Sets** Polygene risk scores were derived for combinations of disorders (“discovery sets”) and applied sequentially to the remaining disorders (“target sets”). Results are grouped by each discovery set. The proportion of variance explained for the target disorder (estimated via Nagelkerke’s pseudo  $R^2$ ) is plotted on the y-axis. Color-coding denotes the gradient of  $p$ -value thresholds,  $p_T$  used to select training set SNPs. Lower case letters above the bars indicate statistical significance for analysis, with “a” through “f” corresponding to values of  $p < 0.05$ ,  $10^{-4}$ ,  $10^{-8}$ ,  $10^{-12}$ ,  $10^{-16}$ , and  $10^{-50}$ , respectively.

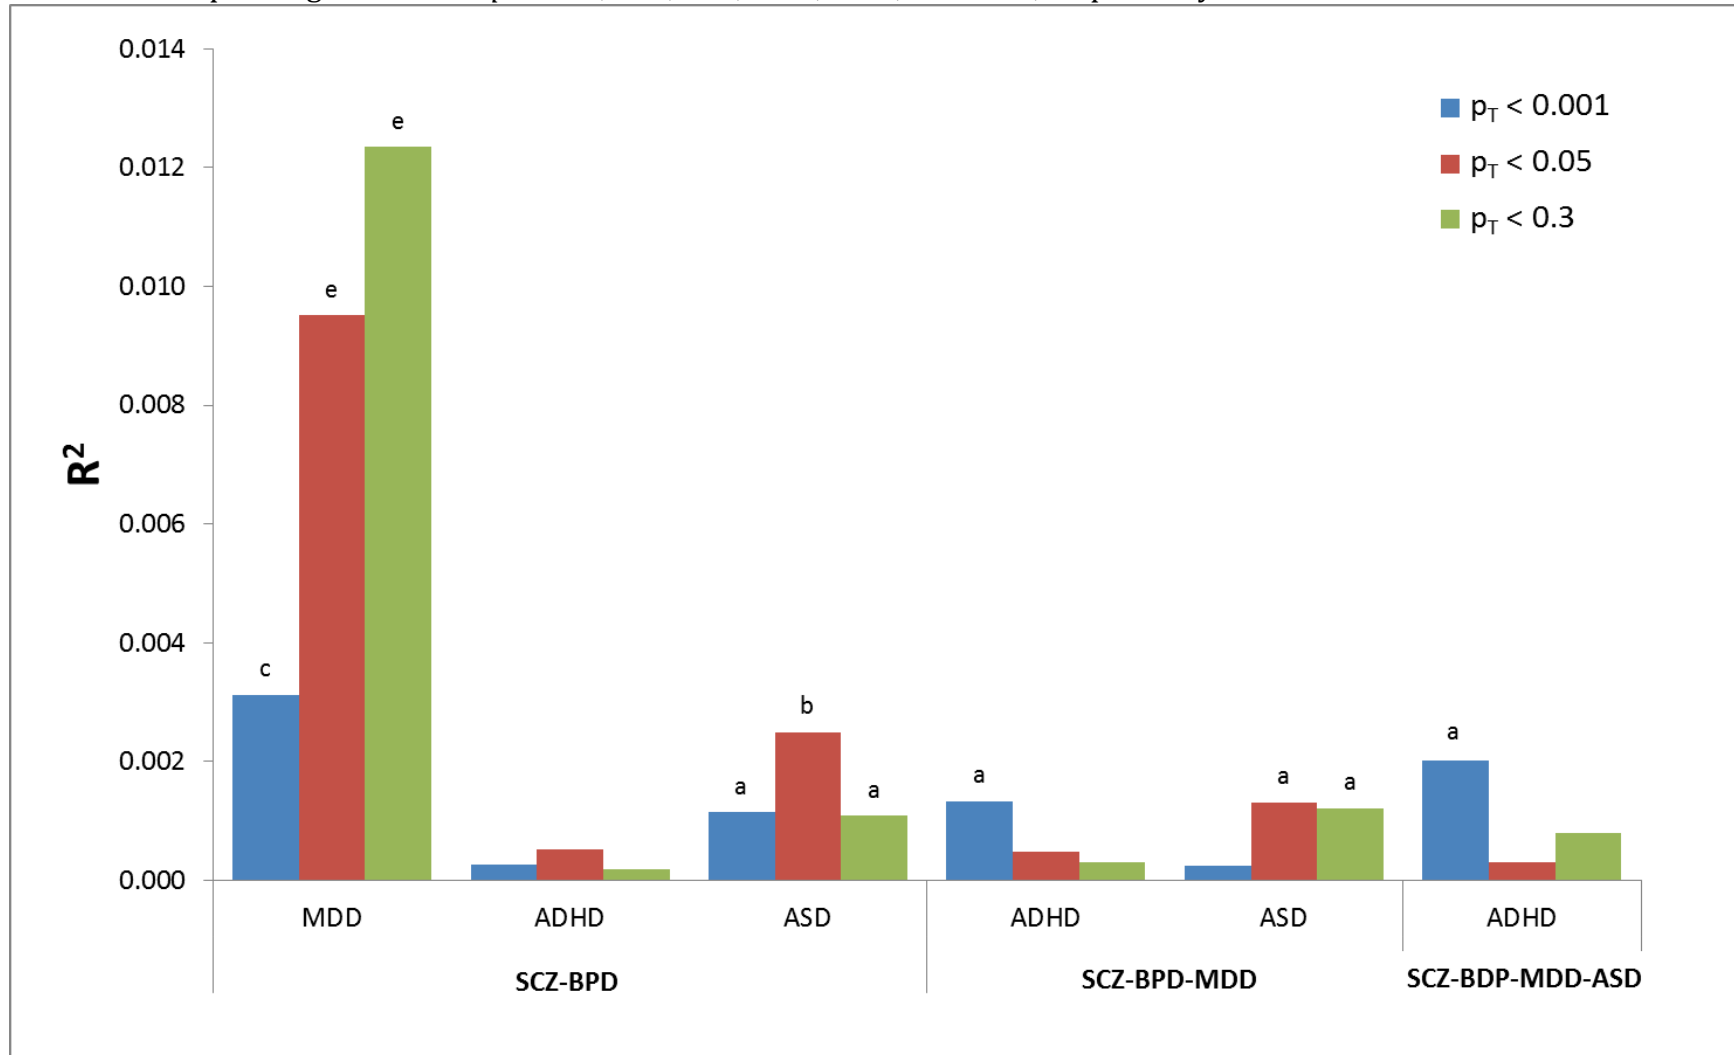



**XVII. Table S6: Top 50 Pathway Analysis Results**

| Pathway Gene No | Associated Interval No | Empirical P-Value | Corrected P-value | GO Term    | GO Name                                                   |
|-----------------|------------------------|-------------------|-------------------|------------|-----------------------------------------------------------|
| 67              | 20                     | 9.9999E-06        | 0.036593          | GO:0005262 | calcium channel activity                                  |
| 120             | 19                     | 2.99997E-05       | 0.069186          | GO:0032259 | methylation                                               |
| 136             | 22                     | 3.99996E-05       | 0.082983          | GO:0009952 | anterior/posterior pattern specification                  |
| 110             | 18                     | 6.99993E-05       | 0.135173          | GO:0043414 | macromolecule methylation                                 |
| 71              | 13                     | 0.000179998       | 0.276545          | GO:0009855 | determination of bilateral symmetry                       |
| 46              | 11                     | 0.000189998       | 0.289742          | GO:0000186 | activation of MAPKK activity                              |
| 72              | 13                     | 0.000199998       | 0.304339          | GO:0009799 | specification of symmetry                                 |
| 168             | 22                     | 0.000239998       | 0.346131          | GO:0006730 | one-carbon metabolic process                              |
| 169             | 22                     | 0.000239998       | 0.346131          | GO:0008168 | methyltransferase activity                                |
| 175             | 22                     | 0.000329997       | 0.431114          | GO:0016741 | transferase activity, transferring one-carbon groups      |
| 66              | 12                     | 0.000339997       | 0.438912          | GO:0007368 | determination of left/right symmetry                      |
| 8               | 4                      | 0.000409996       | 0.4977            | GO:0008239 | dipeptidyl-peptidase activity                             |
| 33              | 8                      | 0.000469995       | 0.538692          | GO:0001947 | heart looping                                             |
| 33              | 8                      | 0.000469995       | 0.538692          | GO:0003143 | embryonic heart tube morphogenesis                        |
| 33              | 8                      | 0.000469995       | 0.538692          | GO:0061371 | determination of heart left/right asymmetry               |
| 88              | 14                     | 0.000489995       | 0.55169           | GO:0008757 | S-adenosylmethionine-dependent methyltransferase activity |
| 192             | 21                     | 0.000529995       | 0.577684          | GO:0010498 | proteasomal protein catabolic process                     |
| 41              | 9                      | 0.000579994       | 0.606479          | GO:0042054 | histone methyltransferase activity                        |
| 108             | 18                     | 0.000679993       | 0.654669          | GO:0048736 | appendage development                                     |

|     |    |             |          |            |                                                             |
|-----|----|-------------|----------|------------|-------------------------------------------------------------|
| 108 | 18 | 0.000679993 | 0.654669 | GO:0060173 | limb development                                            |
| 38  | 8  | 0.000699993 | 0.663467 | GO:0043021 | ribonucleoprotein complex binding                           |
| 48  | 9  | 0.000749993 | 0.688462 | GO:0061136 | regulation of proteasomal protein catabolic process         |
| 8   | 4  | 0.000789992 | 0.707259 | GO:0034123 | positive regulation of toll-like receptor signaling pathway |
| 102 | 17 | 0.00096999  | 0.774845 | GO:0035107 | appendage morphogenesis                                     |
| 102 | 17 | 0.00096999  | 0.774845 | GO:0035108 | limb morphogenesis                                          |
| 66  | 11 | 0.00097999  | 0.779444 | GO:0032526 | response to retinoic acid                                   |
| 72  | 12 | 0.00103999  | 0.79784  | GO:0034399 | nuclear periphery                                           |
| 172 | 26 | 0.00108999  | 0.810238 | GO:0005244 | voltage-gated ion channel activity                          |
| 172 | 26 | 0.00108999  | 0.810238 | GO:0022832 | voltage-gated channel activity                              |
| 75  | 12 | 0.00110999  | 0.814837 | GO:0006479 | protein methylation                                         |
| 75  | 12 | 0.00110999  | 0.814837 | GO:0008213 | protein alkylation                                          |
| 187 | 20 | 0.00118999  | 0.833633 | GO:0043161 | proteasomal ubiquitin-dependent protein catabolic process   |
| 56  | 10 | 0.00131999  | 0.861628 | GO:0016571 | histone methylation                                         |
| 65  | 11 | 0.00131999  | 0.861628 | GO:0016363 | nuclear matrix                                              |
| 25  | 6  | 0.00148999  | 0.888022 | GO:0008173 | RNA methyltransferase activity                              |
| 5   | 3  | 0.00151998  | 0.893821 | GO:0032988 | ribonucleoprotein complex disassembly                       |
| 17  | 5  | 0.00171998  | 0.917217 | GO:0043022 | ribosome binding                                            |
| 5   | 3  | 0.00176998  | 0.921816 | GO:0035197 | siRNA binding                                               |
| 167 | 21 | 0.00179998  | 0.925815 | GO:0060562 | epithelial tube morphogenesis                               |
| 80  | 12 | 0.00183998  | 0.930414 | GO:0033189 | response to vitamin A                                       |
| 57  | 10 | 0.00202998  | 0.944611 | GO:0008276 | protein methyltransferase activity                          |
| 12  | 4  | 0.00208998  | 0.94981  | GO:0051205 | protein insertion into membrane                             |
| 18  | 5  | 0.00224998  | 0.957409 | GO:0031519 | PcG protein complex                                         |
| 41  | 8  | 0.00226998  | 0.957808 | GO:0034968 | histone lysine methylation                                  |
| 12  | 4  | 0.00245998  | 0.968606 | GO:0001510 | RNA methylation                                             |

|     |    |            |          |            |                                                                                |
|-----|----|------------|----------|------------|--------------------------------------------------------------------------------|
| 124 | 16 | 0.00283997 | 0.979404 | GO:0016607 | nuclear speck                                                                  |
| 132 | 19 | 0.00300997 | 0.984003 | GO:0030031 | cell projection assembly                                                       |
| 137 | 16 | 0.00300997 | 0.984003 | GO:0015931 | nucleobase-containing compound transport                                       |
| 32  | 8  | 0.00309997 | 0.984803 | GO:0051925 | regulation of calcium ion transport via voltage-gated calcium channel activity |

**Pathway Gene No:** number of human reference hg18 genes annotated by a corresponding GO term; **Associated Gene No:** number of LD-independent association intervals that intersect with at least one reference gene annotated by a corresponding GO term; **Empirical P-Value:** gene set enrichment  $p$  value assessed by a random interval-based permutation procedure; **Corrected P-Value:** gene set enrichment  $p$  value adjusted by multiple testing of 6,600 GO terms; **GO Term:** Gene Ontology Accession identifier; **GO Name:** Name of GO Term.

#### XVIII. Table S7: Calcium Channel Activity Gene Set Results

| Gene Symbol       | Genic Region               | Index SNP  | Index SNP P | Gene Name                                                                                                                  |
|-------------------|----------------------------|------------|-------------|----------------------------------------------------------------------------------------------------------------------------|
| CACNA2D4, CACNA1C | chr12:1891122..2817115     | rs1024582  | 1.87E-08    | calcium channel, voltage-dependent, alpha 2/delta subunit 4; calcium channel, voltage-dependent, L type, alpha 1C subunit; |
| CACNB2            | chr10:18394605..18840798   | rs2799573  | 4.29E-08    | calcium channel, voltage-dependent, beta 2 subunit                                                                         |
| CACNA1S           | chr1:200998641..201116694  | rs2297909  | 2.27E-06    | calcium channel, voltage-dependent, L type, alpha 1S subunit                                                               |
| GRIN2A            | chr16:9837260..10311611    | rs8058295  | 7.12E-06    | glutamate receptor, ionotropic, N-methyl D-aspartate 2A                                                                    |
| CALHM1            | chr10:105203143..105253645 | rs11191732 | 8.65E-06    | calcium homeostasis modulator 1                                                                                            |
| CACNA1D           | chr3:53493682..53856490    | rs893363   | 1.91E-05    | calcium channel, voltage-dependent, L type, alpha 1D subunit                                                               |
| ITPR2             | chr12:26480341..27021131   | rs12815170 | 2.37E-05    | inositol 1,4,5-triphosphate receptor, type 2                                                                               |

|          |                           |            |           |                                                                    |
|----------|---------------------------|------------|-----------|--------------------------------------------------------------------|
| TRPM3    | chr9:73139948..74096820   | rs4745072  | 7.82E-05  | transient receptor potential cation channel, subfamily M, member 3 |
| GPM6A    | chr4:176544084..176958815 | rs1021226  | 0.0002478 | glycoprotein M6A                                                   |
| CACNA1E  | chr1:181347237..181787219 | rs577528   | 0.0002697 | calcium channel, voltage-dependent, R type, alpha 1E subunit       |
| CATSPER4 | chr1:26482051..26539459   | rs1335762  | 0.0002714 | cation channel, sperm associated 4                                 |
| TMEM37   | chr2:120152476..120206096 | rs7578714  | 0.0003744 | transmembrane protein 37                                           |
| GRIN3A   | chr9:104321634..104535862 | rs7047153  | 0.0003822 | glutamate receptor, ionotropic, N-methyl-D-aspartate 3A            |
| TPCN2    | chr11:68781349..68868072  | rs679596   | 0.000407  | two pore segment channel 2                                         |
| TRPC4    | chr13:38200772..38479562  | rs2008441  | 0.000545  | transient receptor potential cation channel, subfamily C, member 4 |
| ITPR1    | chr3:4500031..4899524     | rs11708874 | 0.0006516 | inositol 1,4,5-triphosphate receptor, type 1                       |
| CATSPER2 | chr15:43910700..43995316  | rs694461   | 0.0007349 | cation channel, sperm associated 2                                 |
| CATSPER1 | chr11:65774222..65828988  | rs539046   | 0.0007813 | cation channel, sperm associated 1                                 |
| PSEN1    | chr14:73568154..73697109  | rs7142086  | 0.0008547 | presenilin 1                                                       |
| CACNA2D2 | chr3:50390232..50576675   | rs2526752  | 0.0008854 | calcium channel, voltage-dependent, alpha 2/delta subunit 2        |

**Gene Symbol:** HUGO Gene Nomenclature Committee (HGNC) gene symbol; **Genic Region:** UCSD Genome Browser hg.18-based chromosomal locus of each gene (including 35kb upstream & 10kb downstream of transcription starting & ending position); **Index SNP:** SNP identifier with the most significant meta analysis *p* value within the corresponding genic region; **Index SNP P:** meta analysis *p* value of the index SNP.

**XIX. Table S8. List of 73 calcium channel activity genes that are analyzed as 67 gene segments in the INRICH pathway analysis (<http://atgu.mgh.harvard.edu/inrich>).**

| ENSEMBL ID      | Chromosome | Start BP  | End BP    | Symbol   | Pathway Analysis |
|-----------------|------------|-----------|-----------|----------|------------------|
| ENSG00000188782 | 1          | 26354638  | 26412046  | CATSPER4 | included         |
| ENSG00000198216 | 1          | 179613860 | 180053842 | CACNA1E  | included         |
| ENSG00000081248 | 1          | 199265264 | 199383317 | CACNA1S  | included         |
| ENSG00000198626 | 1          | 235237127 | 236205982 | RYR2     | included         |
| ENSG00000171227 | 2          | 119868946 | 119922566 | TMEM37   | included         |
| ENSG00000135914 | 2          | 231671187 | 231733076 | HTR2B    | included         |
| ENSG00000144481 | 2          | 234455781 | 234602905 | TRPM8    | included         |
| ENSG00000150995 | 3          | 4475031   | 4874524   | ITPR1    | included         |
| ENSG00000007402 | 3          | 50365236  | 50551679  | CACNA2D2 | included         |
| ENSG00000157388 | 3          | 53468722  | 53831530  | CACNA1D  | included         |
| ENSG00000157445 | 3          | 54096613  | 55093624  | CACNA2D3 | included         |
| ENSG00000144935 | 3          | 143890605 | 144019420 | TRPC1    | included         |
| ENSG00000174343 | 4          | 39997102  | 40061991  | CHRNA9   | included         |
| ENSG00000118762 | 4          | 89112843  | 89227953  | PKD2     | included         |
| ENSG00000138741 | 4          | 123009631 | 123127359 | TRPC3    | included         |
| ENSG00000138685 | 4          | 123932312 | 124048841 | FGF2     | included         |
| ENSG00000150625 | 4          | 176781078 | 177195809 | GPM6A    | included         |
| ENSG00000152705 | 5          | 134296494 | 134385291 | CATSPER3 | included         |
| ENSG00000069018 | 5          | 135566897 | 135764124 | TRPC7    | included         |
| ENSG00000096433 | 6          | 33661499  | 33782329  | ITPR3    | included         |
| ENSG00000165125 | 7          | 142269077 | 142328629 | TRPV6    | included         |
| ENSG00000127412 | 7          | 142305388 | 142376027 | TRPV5    | included         |
| ENSG00000104321 | 8          | 73084705  | 73185406  | TRPA1    | included         |
| ENSG00000155886 | 9          | 19495977  | 19811926  | SLC24A2  | included         |
| ENSG00000083067 | 9          | 72329768  | 73286640  | TRPM3    | included         |

|                 |    |           |           |          |                           |
|-----------------|----|-----------|-----------|----------|---------------------------|
| ENSG00000119121 | 9  | 76517230  | 76727830  | TRPM6    | included                  |
| ENSG00000198785 | 9  | 103361455 | 103575683 | GRIN3A   | included                  |
| ENSG00000148408 | 9  | 139857061 | 140148897 | CACNA1B  | included                  |
| ENSG00000165995 | 10 | 18434611  | 18880804  | CACNB2   | included                  |
| ENSG00000185933 | 10 | 105193133 | 105243635 | CALHM1   | included                  |
| ENSG00000129749 | 11 | 3633392   | 3684190   | CHRNA10  | included                  |
| ENSG00000149534 | 11 | 59577309  | 59630020  | MS4A2    | included                  |
| ENSG00000175294 | 11 | 65530798  | 65585564  | CATSPER1 | included                  |
| ENSG00000162341 | 11 | 68537925  | 68624648  | TPCN2    | included                  |
| ENSG00000110218 | 11 | 93466741  | 93564786  | PANX1    | included                  |
| ENSG00000166266 | 11 | 107349668 | 107493713 | CUL5     | included                  |
| ENSG00000151062 | 12 | 1761383   | 1933263   | CACNA2D4 | included as a<br>combined |
| ENSG00000151067 | 12 | 1915212   | 2687376   | CACNA1C  |                           |
| ENSG00000150086 | 12 | 13595410  | 14059320  | GRIN2B   | included                  |
| ENSG00000123104 | 12 | 26371608  | 26912398  | ITPR2    | included                  |
| ENSG00000111199 | 12 | 108695272 | 108790595 | TRPV4    | included                  |
| ENSG00000186815 | 12 | 112108237 | 112230773 | TPCN1    | included                  |
| ENSG00000182500 | 12 | 120513837 | 120574966 | ORA1     | included                  |
| ENSG00000133107 | 13 | 37098772  | 37377562  | TRPC4    | included                  |
| ENSG00000185989 | 13 | 113755295 | 113951188 | RASA3    | included                  |
| ENSG00000080815 | 14 | 72637907  | 72766862  | PSEN1    | included                  |
| ENSG00000134160 | 15 | 29070555  | 29275768  | TRPM1    | included                  |
| ENSG00000198838 | 15 | 31355468  | 31955591  | RYR3     | included                  |
| ENSG00000166762 | 15 | 41697992  | 41782608  | CATSPER2 | included                  |
| ENSG00000092439 | 15 | 48626642  | 48801304  | TRPM7    | included                  |
| ENSG00000196557 | 16 | 1108241   | 1221772   | CACNA1H  | included                  |
| ENSG00000183454 | 16 | 9744761   | 10219112  | GRIN2A   | included                  |
| ENSG00000006116 | 16 | 24139374  | 24291623  | CACNG3   | included                  |
| ENSG00000167723 | 17 | 3350545   | 3443039   | TRPV3    | included                  |
| ENSG00000196689 | 17 | 3405492   | 3482141   | TRPV1    | included                  |
| ENSG00000108405 | 17 | 3736639   | 3801709   | P2RX1    | included                  |



|                 |    |           |           |         |                           |
|-----------------|----|-----------|-----------|---------|---------------------------|
| ENSG00000187688 | 17 | 16224612  | 16291042  | TRPV2   | included                  |
| ENSG00000067191 | 17 | 34573234  | 34642428  | CACNB1  | included                  |
| ENSG00000006283 | 17 | 45958427  | 46069834  | CACNA1G | included                  |
| ENSG00000075429 | 17 | 62226696  | 62322065  | CACNG5  | included                  |
| ENSG00000075461 | 17 | 62356474  | 62469980  | CACNG4  | included as a<br>combined |
| ENSG00000108878 | 17 | 62436167  | 62493375  | CACNG1  |                           |
| ENSG00000141837 | 19 | 13168255  | 13513274  | CACNA1A | included                  |
| ENSG00000196218 | 19 | 43581179  | 43780044  | RYR1    | included                  |
| ENSG00000130529 | 19 | 54317863  | 54416903  | TRPM4   | included                  |
| ENSG00000105605 | 19 | 59069400  | 59149007  | CACNG7  | included as a<br>combined |
| ENSG00000142408 | 19 | 59123105  | 59195281  | CACNG8  |                           |
| ENSG00000130433 | 19 | 59152353  | 59217735  | CACNG6  |                           |
| ENSG00000142185 | 21 | 44559473  | 44697392  | TRPM2   | included                  |
| ENSG00000166862 | 22 | 35279913  | 35464549  | CACNG2  | included                  |
| ENSG00000100346 | 22 | 38261703  | 38425688  | CACNA1I | included                  |
| ENSG00000102001 | X  | 48938466  | 49011777  | CACNA1F | excluded                  |
| ENSG00000072315 | X  | 110894198 | 111247660 | TRPC5   | excluded                  |

**Ensembl ID:** Ensembl gene identifier; **Start BP:** starting base pair position of genic region including the 35kb upstream from transcription starting sites; **End BP:** ending base pair position of genic region including the 10kb downstream from transcription ending sites; **Symbol:** HGNC gene symbol; **Pathway Analysis:** to indicate whether the gene was included/excluded in the INRICH analysis.

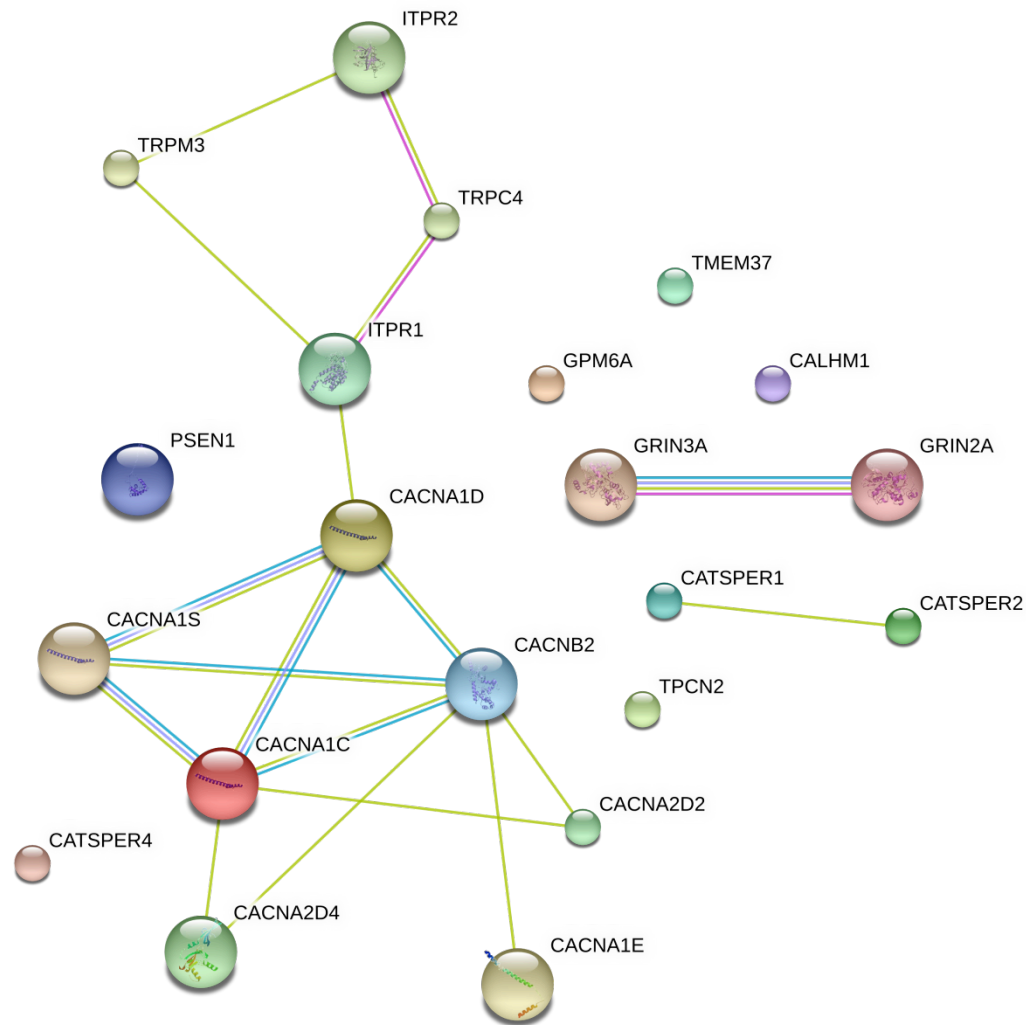

**XX. Figure S9. Functional relationship between 21 calcium channel activity genes that showed significant association with 5 disorders at  $p < 10^{-3}$  in the primary meta analysis (<http://string-db.org>)<sup>13</sup>.** The network view summarizes the network of predicted associations for a particular group of proteins. The network nodes are proteins. The edges represent the predicted functional associations, supported by the existence of the seven types of evidence

used in predicting the associations. A red line indicates the presence of fusion evidence; a green line - neighborhood evidence; a blue line - cooccurrence evidence; a purple line - experimental evidence; a yellow line - textmining evidence; a light blue line - database evidence; a black line - coexpression evidence. Detailed functional evidence is summarized in Table S9.

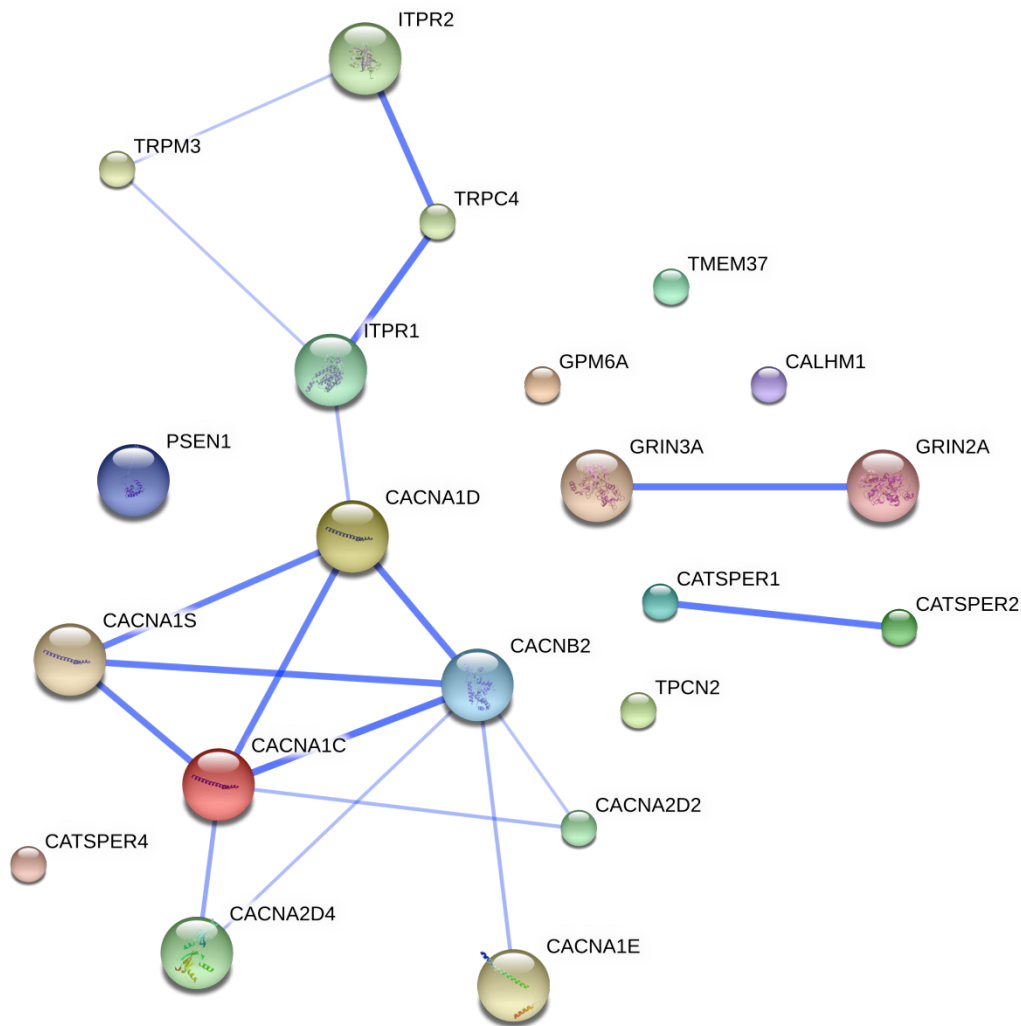

**XXI. Figure S10. Functional relationship between 21 calcium channel activity genes that showed significant association with 5 disorders at  $p < 10^{-3}$  in the primary meta analysis (<http://string-db.org>)<sup>13</sup>.** The network view summarizes the network of predicted associations for a particular group of proteins. The network nodes are proteins. The edges represent the predicted functional associations, supported by the existence of the seven types of evidence

used in predicting the associations. Edge thickness represents the predicted functional score between protein pairs. Detailed functional evidence and scores are summarized in Table S9.

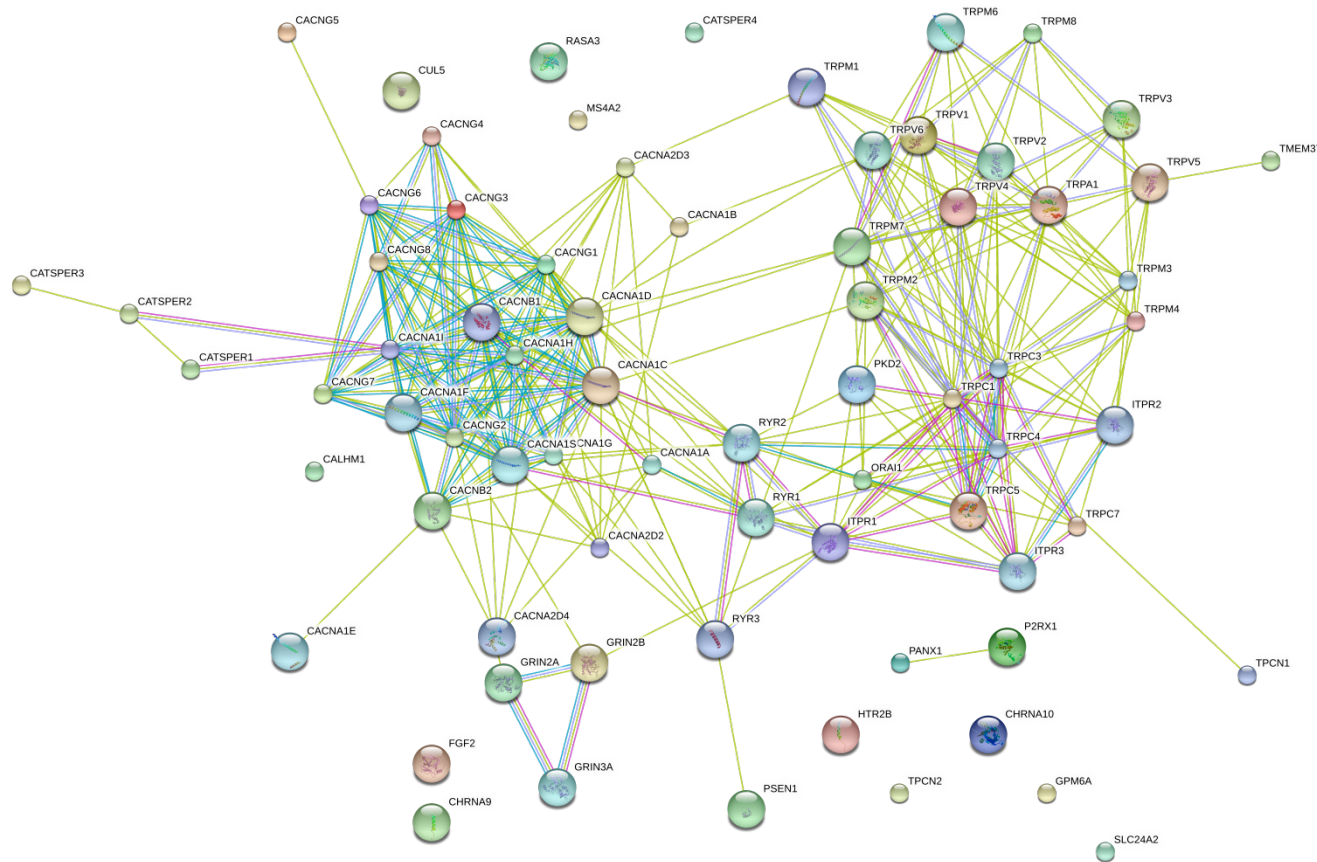

**XXII. Figure S11. Functional relationships between 73 calcium channel activity genes defined by Gene Ontology ([http://amigo.geneontology.org/cgi-bin/amigo/term\\_details?term=GO:0005262](http://amigo.geneontology.org/cgi-bin/amigo/term_details?term=GO:0005262))**. The network view from the STRING database (<http://string-db.org>)<sup>13</sup> summarizes the network of predicted associations for a particular group of proteins. The network nodes are proteins. The edges represent the predicted functional associations, supported by the existence of the seven types of evidence used in predicting the associations. A red line indicates the presence of fusion

evidence; a green line - neighborhood evidence; a blue line – co-occurrence evidence; a purple line - experimental evidence; a yellow line – text mining evidence; a light blue line - database evidence; a black line – co-expression evidence. Detailed functional evidence and scores are summarized in Table S10.

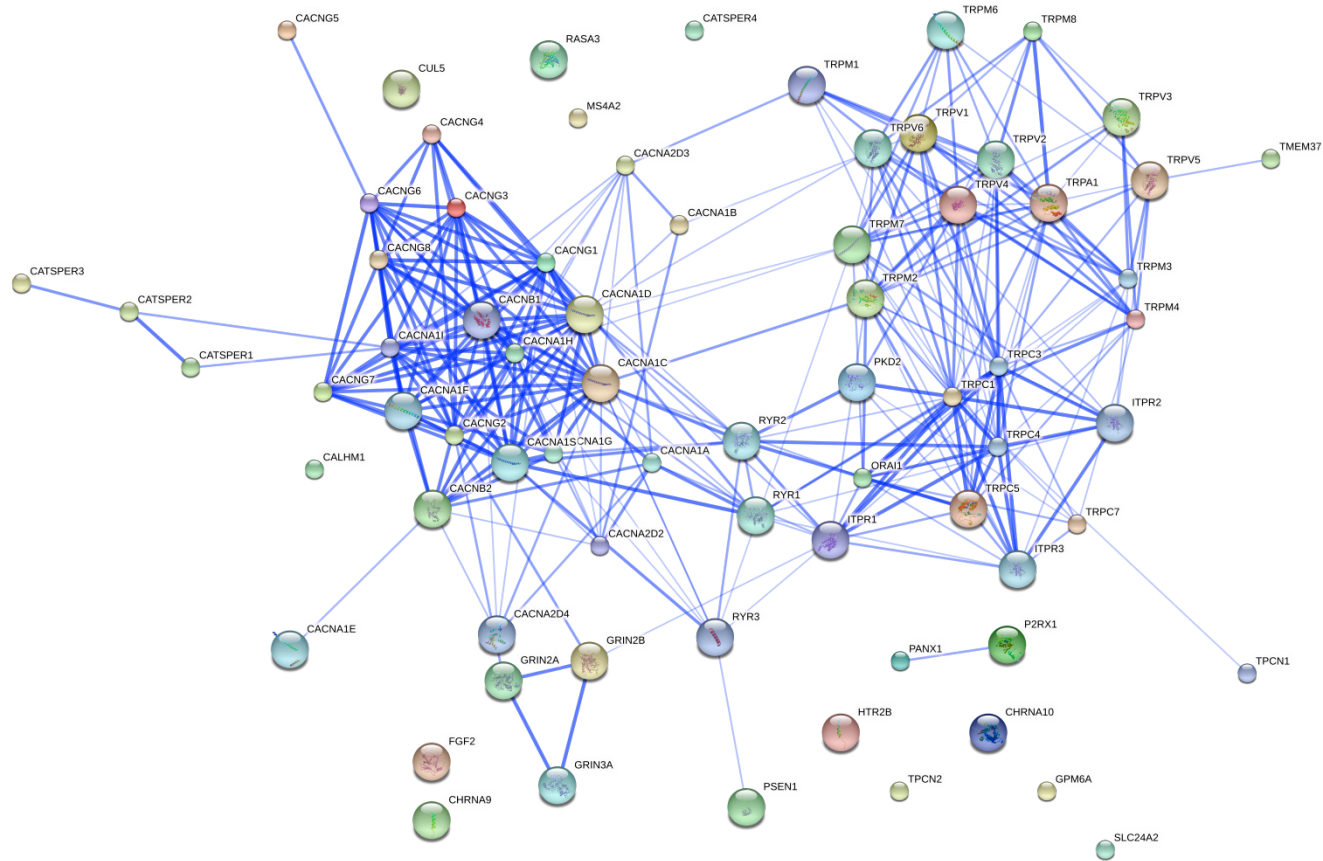

**XXIII. Figure S12. Functional relationships between 73 calcium channel activity genes defined by Gene Ontology ([http://amigo.geneontology.org/cgi-bin/amigo/term\\_details?term=GO:0005262](http://amigo.geneontology.org/cgi-bin/amigo/term_details?term=GO:0005262)). The network view from the STRING database (<http://string-db.org>)<sup>13</sup> summarizes the network of predicted associations for a particular group of proteins. The network nodes are proteins. The edges represent the predicted functional associations, supported by the existence of the seven types of evidence used in predicting the associations. Edge thickness represents the predicted functional score between protein pairs. Detailed functional evidence and scores are summarized in Table S10.**

XXIV. Table S9. Detailed functional association score from the STRING database (<http://string-db.org/>)<sup>13</sup> between 21 calcium channel activity genes that showed association with 5 disorders at  $p < 10^{-3}$  in the primary meta analysis.

| Node1    | Node2    | Homology Score | Experimental Score | Knowledge Score | Text Mining Score | Combined Score |
|----------|----------|----------------|--------------------|-----------------|-------------------|----------------|
| CACNB2   | CACNA1C  | 0              | 0                  | 0.9             | 0.86              | 0.985          |
| ITPR1    | TRPC4    | 0              | 0.821              | 0               | 0.81              | 0.963          |
| GRIN3A   | GRIN2A   | 0.758          | 0.538              | 0.9             | 0.879             | 0.961          |
| CATSPER1 | CATSPER2 | 0              | 0                  | 0               | 0.954             | 0.954          |
| CACNB2   | CACNA1D  | 0              | 0                  | 0.9             | 0.362             | 0.931          |
| CACNA1S  | CACNB2   | 0              | 0                  | 0.9             | 0.33              | 0.928          |
| ITPR2    | TRPC4    | 0              | 0.62               | 0               | 0.81              | 0.923          |
| CACNA1D  | CACNA1C  | 0.955          | 0                  | 0.9             | 0.804             | 0.903          |
| CACNA1S  | CACNA1C  | 0.953          | 0                  | 0.9             | 0.747             | 0.903          |
| CACNA1S  | CACNA1D  | 0.952          | 0                  | 0.9             | 0.602             | 0.902          |
| CACNA2D4 | CACNA1C  | 0              | 0                  | 0               | 0.643             | 0.643          |
| CACNA1E  | CACNB2   | 0              | 0                  | 0               | 0.539             | 0.539          |
| ITPR1    | CACNA1D  | 0              | 0                  | 0               | 0.522             | 0.522          |
| CACNA2D2 | CACNA1C  | 0              | 0                  | 0               | 0.515             | 0.515          |
| CACNA2D4 | CACNB2   | 0              | 0                  | 0               | 0.475             | 0.475          |
| CACNA2D2 | CACNB2   | 0              | 0                  | 0               | 0.444             | 0.443          |
| ITPR1    | TRPM3    | 0              | 0                  | 0               | 0.433             | 0.433          |
| ITPR2    | TRPM3    | 0              | 0                  | 0               | 0.433             | 0.433          |

**Homology Score:** calculated based on the degree of homology of the interactors. **Experimental Score:** based on a list of significant protein interaction datasets, gathered from other protein-protein interaction databases: BIND, DIP, GRID, HPRD, IntAct, MINT, and PID; **Knowledge Score:** based on pathway and functional annotation databases: Biocarta, BioCyc, GO, KEGG, and Reactome; **Text Mining Score:** based on a list of significant protein interaction groups, extracted from the abstracts of scientific literature; **Combined Score:** computed by combining the probabilities from the different evidence channels, correcting for the probability of randomly observing an interaction. For a more detailed description refer to von Mering C et al.<sup>14</sup>





**XXV. Table S10. Detailed functional association score from the STRING database<sup>13</sup> for 73 calcium channel activity genes (GO:0005262)**

| <b>Node1</b> | <b>Node2</b> | <b>Homology Score</b> | <b>Experimental Score</b> | <b>Knowledge Score</b> | <b>Text Mining Score</b> | <b>Combined Score</b> |
|--------------|--------------|-----------------------|---------------------------|------------------------|--------------------------|-----------------------|
| CACNG8       | CACNG6       | 0                     | 0                         | 0.9                    | 0.956                    | 0.995                 |
| CACNG8       | CACNG1       | 0                     | 0                         | 0.9                    | 0.956                    | 0.995                 |
| CACNG6       | CACNG7       | 0                     | 0                         | 0.9                    | 0.954                    | 0.995                 |
| CACNG1       | CACNG3       | 0                     | 0                         | 0.9                    | 0.96                     | 0.995                 |
| TRPC1        | TRPC5        | 0.921                 | 0.913                     | 0.9                    | 0.993                    | 0.991                 |
| TRPC3        | TRPC1        | 0.872                 | 0.913                     | 0.9                    | 0.993                    | 0.991                 |
| TRPC3        | ITPR3        | 0                     | 0.925                     | 0                      | 0.878                    | 0.99                  |
| CACNB1       | CACNA1D      | 0                     | 0                         | 0.9                    | 0.871                    | 0.986                 |
| CACNA1D      | CACNG1       | 0                     | 0                         | 0.9                    | 0.873                    | 0.986                 |
| TRPC1        | PKD2         | 0                     | 0.62                      | 0                      | 0.964                    | 0.985                 |
| CACNB2       | CACNA1C      | 0                     | 0                         | 0.9                    | 0.86                     | 0.985                 |
| CACNA1D      | CACNG8       | 0                     | 0                         | 0.9                    | 0.856                    | 0.984                 |
| CACNA1D      | CACNG7       | 0                     | 0                         | 0.9                    | 0.856                    | 0.984                 |
| CACNB1       | CACNA1S      | 0                     | 0                         | 0.9                    | 0.834                    | 0.982                 |
| CACNA1S      | RYR1         | 0                     | 0.62                      | 0                      | 0.953                    | 0.981                 |
| CACNA1D      | CACNG6       | 0                     | 0                         | 0.9                    | 0.822                    | 0.981                 |
| CACNA1S      | CACNG1       | 0                     | 0                         | 0.9                    | 0.812                    | 0.979                 |
| ORAI1        | TRPC1        | 0                     | 0                         | 0                      | 0.979                    | 0.979                 |
| TRPM8        | TRPA1        | 0                     | 0                         | 0                      | 0.979                    | 0.979                 |
| CACNA1D      | CACNG3       | 0                     | 0                         | 0.9                    | 0.811                    | 0.979                 |
| TRPC4        | TRPC1        | 0.922                 | 0.785                     | 0.9                    | 0.967                    | 0.978                 |
| ITPR3        | TRPC1        | 0                     | 0.816                     | 0                      | 0.885                    | 0.977                 |
| ITPR1        | TRPC3        | 0                     | 0.821                     | 0                      | 0.878                    | 0.976                 |
| CACNG6       | CACNG3       | 0                     | 0                         | 0.9                    | 0.732                    | 0.971                 |
| CACNB1       | CACNG1       | 0                     | 0                         | 0                      | 0.965                    | 0.965                 |
| ITPR1        | TRPC4        | 0                     | 0.821                     | 0                      | 0.81                     | 0.963                 |

|          |          |       |       |     |       |       |
|----------|----------|-------|-------|-----|-------|-------|
| TRPC4    | ITPR3    | 0     | 0.816 | 0   | 0.81  | 0.962 |
| GRIN3A   | GRIN2A   | 0.758 | 0.538 | 0.9 | 0.879 | 0.961 |
| TRPC3    | ORAI1    | 0     | 0.62  | 0   | 0.905 | 0.961 |
| GRIN3A   | GRIN2B   | 0.758 | 0.538 | 0.9 | 0.867 | 0.96  |
| CACNG4   | CACNG1   | 0     | 0     | 0   | 0.96  | 0.96  |
| TRPC3    | TRPC5    | 0.882 | 0.552 | 0.9 | 0.961 | 0.957 |
| TRPC4    | TRPC3    | 0.88  | 0.552 | 0.9 | 0.993 | 0.957 |
| ITPR2    | TRPC1    | 0     | 0.62  | 0   | 0.895 | 0.957 |
| TRPC4    | TRPC5    | 0.955 | 0.552 | 0.9 | 0.964 | 0.954 |
| CATSPER1 | CATSPER2 | 0     | 0     | 0   | 0.954 | 0.954 |
| ITPR1    | TRPC1    | 0     | 0.559 | 0   | 0.879 | 0.943 |
| CACNB2   | CACNA1D  | 0     | 0     | 0.9 | 0.362 | 0.931 |
| CACNG1   | CACNG7   | 0.669 | 0     | 0.9 | 0.953 | 0.931 |
| CACNA1F  | CACNB2   | 0     | 0     | 0.9 | 0.344 | 0.93  |
| ITPR2    | TRPC3    | 0     | 0     | 0   | 0.929 | 0.929 |
| CACNA1G  | CACNA1C  | 0.654 | 0     | 0.9 | 0.84  | 0.928 |
| CACNA1S  | CACNB2   | 0     | 0     | 0.9 | 0.33  | 0.928 |
| CACNB1   | CACNA1C  | 0     | 0     | 0.9 | 0.319 | 0.927 |
| CACNA1G  | CACNA1D  | 0.662 | 0     | 0.9 | 0.835 | 0.927 |
| CACNA1H  | CACNA1C  | 0.664 | 0     | 0.9 | 0.777 | 0.925 |
| ITPR2    | TRPC4    | 0     | 0.62  | 0   | 0.81  | 0.923 |
| CACNA1H  | CACNA1D  | 0.68  | 0     | 0.9 | 0.648 | 0.919 |
| CACNG8   | CACNG7   | 0.805 | 0     | 0.9 | 0.954 | 0.918 |
| CACNB1   | CACNA1A  | 0     | 0.62  | 0   | 0.792 | 0.916 |
| CACNG7   | CACNG3   | 0.812 | 0     | 0.9 | 0.85  | 0.915 |
| CACNA1I  | CACNA1C  | 0.706 | 0     | 0.9 | 0.522 | 0.914 |
| CACNG2   | CACNA1D  | 0     | 0     | 0.9 | 0.18  | 0.912 |
| CACNA1C  | CACNG1   | 0     | 0     | 0.9 | 0.175 | 0.912 |
| CACNA1I  | CACNG1   | 0     | 0     | 0.9 | 0.167 | 0.911 |
| CACNB1   | CACNA1G  | 0     | 0     | 0.9 | 0.173 | 0.911 |
| CACNB1   | CACNA1H  | 0     | 0     | 0.9 | 0.171 | 0.911 |

|         |         |       |   |     |       |       |
|---------|---------|-------|---|-----|-------|-------|
| CACNA1I | CACNB1  | 0     | 0 | 0.9 | 0.166 | 0.911 |
| CACNA1H | CACNG1  | 0     | 0 | 0.9 | 0.172 | 0.911 |
| CACNG2  | CACNG1  | 0     | 0 | 0.9 | 0.161 | 0.91  |
| CACNA1F | CACNG1  | 0     | 0 | 0.9 | 0.159 | 0.91  |
| CACNB1  | CACNA1F | 0     | 0 | 0.9 | 0.158 | 0.91  |
| CACNG6  | CACNG1  | 0.902 | 0 | 0.9 | 0.945 | 0.909 |
| CACNA1G | CACNB2  | 0     | 0 | 0.9 | 0.147 | 0.908 |
| CACNA1S | CACNG3  | 0     | 0 | 0.9 | 0.138 | 0.908 |
| CACNA1C | CACNG3  | 0     | 0 | 0.9 | 0.138 | 0.908 |
| CACNA1C | CACNG7  | 0     | 0 | 0.9 | 0.138 | 0.908 |
| CACNA1S | CACNG8  | 0     | 0 | 0.9 | 0.138 | 0.908 |
| CACNA1S | CACNG7  | 0     | 0 | 0.9 | 0.138 | 0.908 |
| CACNG8  | CACNA1C | 0     | 0 | 0.9 | 0.138 | 0.908 |
| CACNA1S | CACNA1G | 0.693 | 0 | 0.9 | 0.33  | 0.908 |
| CACNA1H | CACNG7  | 0     | 0 | 0.9 | 0.135 | 0.907 |
| CACNA1H | CACNG8  | 0     | 0 | 0.9 | 0.135 | 0.907 |
| CACNA1I | CACNG8  | 0     | 0 | 0.9 | 0.129 | 0.907 |
| CACNA1S | CACNA1H | 0.698 | 0 | 0.9 | 0.305 | 0.907 |
| CACNA1I | CACNG7  | 0     | 0 | 0.9 | 0.129 | 0.907 |
| CACNA1I | CACNG3  | 0     | 0 | 0.9 | 0.129 | 0.907 |
| CACNA1H | CACNG3  | 0     | 0 | 0.9 | 0.135 | 0.907 |
| CACNA1I | CACNA1G | 0.931 | 0 | 0.9 | 0.96  | 0.906 |
| CACNA1I | CACNA1H | 0.935 | 0 | 0.9 | 0.962 | 0.906 |
| CACNA1F | CACNG8  | 0     | 0 | 0.9 | 0.122 | 0.906 |
| GRIN2A  | GRIN2B  | 0.939 | 0 | 0.9 | 0.994 | 0.906 |
| CACNA1F | CACNG3  | 0     | 0 | 0.9 | 0.122 | 0.906 |
| CACNA1G | CACNA1H | 0.935 | 0 | 0.9 | 0.958 | 0.906 |
| CACNA1F | CACNG7  | 0     | 0 | 0.9 | 0.122 | 0.906 |
| CACNA1C | CACNG6  | 0     | 0 | 0.9 | 0.127 | 0.906 |
| CACNG2  | CACNA1C | 0     | 0 | 0.9 | 0.127 | 0.906 |
| CACNG4  | CACNG3  | 0.947 | 0 | 0.9 | 0.957 | 0.905 |

|         |         |       |   |     |       |       |
|---------|---------|-------|---|-----|-------|-------|
| CACNA1S | CACNG6  | 0     | 0 | 0.9 | 0.114 | 0.905 |
| CACNG8  | CACNG3  | 0.939 | 0 | 0.9 | 0.857 | 0.905 |
| CACNA1H | CACNG6  | 0     | 0 | 0.9 | 0.111 | 0.905 |
| CACNA1H | CACNG2  | 0     | 0 | 0.9 | 0.105 | 0.904 |
| ITPR2   | ITPR3   | 0.956 | 0 | 0.9 | 0.94  | 0.904 |
| CACNB1  | CACNB2  | 0.951 | 0 | 0.9 | 0.867 | 0.904 |
| CACNA1I | CACNG6  | 0     | 0 | 0.9 | 0.105 | 0.904 |
| CACNG8  | CACNG4  | 0.947 | 0 | 0.9 | 0.929 | 0.904 |
| CACNA1S | CACNG2  | 0     | 0 | 0.9 | 0.108 | 0.904 |
| CACNA1H | CACNB2  | 0     | 0 | 0.9 | 0.105 | 0.904 |
| CACNA1F | CACNA1C | 0.948 | 0 | 0.9 | 0.673 | 0.903 |
| CACNA1I | CACNA1D | 0.699 | 0 | 0.9 | 0.18  | 0.903 |
| CACNA1I | CACNG2  | 0     | 0 | 0.9 | 0.099 | 0.903 |
| CACNA1D | CACNA1C | 0.955 | 0 | 0.9 | 0.804 | 0.903 |
| CACNA1I | CACNB2  | 0     | 0 | 0.9 | 0.099 | 0.903 |
| CACNA1F | CACNG6  | 0     | 0 | 0.9 | 0.097 | 0.903 |
| CACNA1S | CACNA1C | 0.953 | 0 | 0.9 | 0.747 | 0.903 |
| CACNA1F | CACNA1D | 0.953 | 0 | 0.9 | 0.837 | 0.903 |
| CACNA1F | CACNA1G | 0.691 | 0 | 0.9 | 0.147 | 0.902 |
| CACNA1S | CACNA1D | 0.952 | 0 | 0.9 | 0.602 | 0.902 |
| CACNA1F | CACNG2  | 0     | 0 | 0.9 | 0.091 | 0.902 |
| CACNA1F | CACNA1H | 0.705 | 0 | 0.9 | 0.105 | 0.901 |
| CACNA1I | CACNA1F | 0.731 | 0 | 0.9 | 0.099 | 0.901 |
| CACNA1I | CACNA1S | 0.741 | 0 | 0.9 | 0.108 | 0.901 |
| CACNA1F | CACNA1S | 0.946 | 0 | 0.9 | 0.317 | 0.901 |
| CACNG2  | CACNG8  | 0.941 | 0 | 0.9 | 0.095 | 0.9   |
| CACNG2  | CACNG6  | 0     | 0 | 0.9 | 0.07  | 0.9   |
| CACNG2  | CACNG7  | 0.818 | 0 | 0.9 | 0.095 | 0.9   |
| CACNG2  | CACNG3  | 0.963 | 0 | 0.9 | 0.095 | 0.9   |
| CACNG2  | CACNG4  | 0.949 | 0 | 0.9 | 0.095 | 0.9   |
| RYR2    | TRPC5   | 0     | 0 | 0.9 | 0.016 | 0.899 |

|          |         |       |      |     |       |       |
|----------|---------|-------|------|-----|-------|-------|
| TRPC4    | RYR2    | 0     | 0    | 0.9 | 0.037 | 0.899 |
| RYR2     | CACNA1C | 0     | 0.62 | 0   | 0.727 | 0.889 |
| CACNA1A  | RYR1    | 0     | 0    | 0.8 | 0.434 | 0.879 |
| CACNG4   | CACNG6  | 0     | 0    | 0   | 0.861 | 0.861 |
| RYR2     | PKD2    | 0     | 0    | 0   | 0.858 | 0.858 |
| CACNA1D  | CACNG4  | 0     | 0    | 0   | 0.856 | 0.856 |
| TRPC1    | TRPM4   | 0     | 0    | 0   | 0.854 | 0.854 |
| CACNB1   | CACNG4  | 0     | 0    | 0   | 0.851 | 0.851 |
| CACNB1   | CACNG7  | 0     | 0    | 0   | 0.851 | 0.851 |
| CACNB1   | CACNG8  | 0     | 0    | 0   | 0.851 | 0.851 |
| CACNB1   | CACNG3  | 0     | 0    | 0   | 0.851 | 0.851 |
| TRPC4    | ORAI1   | 0     | 0    | 0   | 0.847 | 0.847 |
| TRPM2    | TRPV1   | 0     | 0    | 0   | 0.833 | 0.833 |
| ORAI1    | TRPC5   | 0     | 0    | 0   | 0.83  | 0.83  |
| TRPV2    | TRPM8   | 0     | 0    | 0   | 0.828 | 0.828 |
| TRPC3    | TRPV1   | 0     | 0    | 0   | 0.827 | 0.827 |
| RYR2     | CACNA1S | 0     | 0    | 0   | 0.822 | 0.822 |
| CACNB1   | CACNG6  | 0     | 0    | 0   | 0.819 | 0.819 |
| RYR3     | CACNA1S | 0     | 0    | 0   | 0.815 | 0.815 |
| CACNA1A  | CACNB2  | 0     | 0    | 0   | 0.796 | 0.796 |
| CACNA2D2 | CACNA1A | 0     | 0    | 0   | 0.788 | 0.788 |
| TRPV2    | TRPM4   | 0     | 0    | 0   | 0.787 | 0.787 |
| TRPV4    | TRPM4   | 0     | 0    | 0   | 0.784 | 0.784 |
| TRPC1    | TRPV4   | 0     | 0    | 0   | 0.785 | 0.784 |
| TRPC3    | TRPV4   | 0     | 0    | 0   | 0.782 | 0.782 |
| TRPM1    | TRPV1   | 0     | 0    | 0   | 0.781 | 0.781 |
| TRPM4    | TRPV1   | 0     | 0    | 0   | 0.78  | 0.78  |
| ITPR1    | RYR2    | 0.449 | 0.62 | 0   | 0.78  | 0.78  |
| TRPC1    | TRPV1   | 0     | 0    | 0   | 0.78  | 0.78  |
| TRPV2    | TRPM7   | 0     | 0    | 0   | 0.779 | 0.779 |
| TRPM3    | TRPV4   | 0     | 0    | 0   | 0.779 | 0.778 |

|          |          |   |       |   |       |       |
|----------|----------|---|-------|---|-------|-------|
| TRPC4    | TRPV2    | 0 | 0     | 0 | 0.778 | 0.778 |
| TRPM7    | TRPV4    | 0 | 0     | 0 | 0.779 | 0.778 |
| TRPM7    | TRPV1    | 0 | 0     | 0 | 0.777 | 0.776 |
| TRPM2    | TRPV4    | 0 | 0     | 0 | 0.772 | 0.772 |
| CATSPER2 | CATSPER3 | 0 | 0     | 0 | 0.773 | 0.772 |
| ORAI1    | TRPM2    | 0 | 0     | 0 | 0.771 | 0.771 |
| TRPV2    | TRPM2    | 0 | 0     | 0 | 0.77  | 0.77  |
| TRPM3    | TRPV2    | 0 | 0     | 0 | 0.769 | 0.769 |
| TRPC3    | TRPV2    | 0 | 0     | 0 | 0.76  | 0.76  |
| TRPV6    | TRPC1    | 0 | 0     | 0 | 0.756 | 0.756 |
| TRPM7    | TRPA1    | 0 | 0     | 0 | 0.755 | 0.754 |
| TRPA1    | TRPM4    | 0 | 0     | 0 | 0.753 | 0.752 |
| TRPM3    | TRPV3    | 0 | 0     | 0 | 0.744 | 0.744 |
| ITPR3    | TRPM2    | 0 | 0.548 | 0 | 0.465 | 0.742 |
| TRPV6    | TRPM4    | 0 | 0     | 0 | 0.743 | 0.742 |
| TRPV3    | TRPM4    | 0 | 0     | 0 | 0.739 | 0.738 |
| CACNG6   | CACNG5   | 0 | 0     | 0 | 0.738 | 0.738 |
| TRPM6    | TRPV6    | 0 | 0     | 0 | 0.737 | 0.736 |
| TRPM8    | TRPV5    | 0 | 0     | 0 | 0.736 | 0.736 |
| TRPV3    | TRPM2    | 0 | 0     | 0 | 0.731 | 0.73  |
| TRPM6    | TRPV4    | 0 | 0     | 0 | 0.731 | 0.73  |
| RYR1     | CACNG1   | 0 | 0     | 0 | 0.729 | 0.729 |
| TRPM3    | TRPV1    | 0 | 0     | 0 | 0.721 | 0.72  |
| TRPM3    | TRPV5    | 0 | 0     | 0 | 0.721 | 0.72  |
| TRPM3    | TRPA1    | 0 | 0     | 0 | 0.72  | 0.72  |
| TRPM2    | CACNA1C  | 0 | 0     | 0 | 0.713 | 0.713 |
| TRPV5    | TRPM4    | 0 | 0     | 0 | 0.711 | 0.71  |
| TRPM1    | TRPV2    | 0 | 0     | 0 | 0.708 | 0.708 |
| TRPC3    | TRPV6    | 0 | 0     | 0 | 0.704 | 0.704 |
| CACNA2D2 | CACNA1B  | 0 | 0     | 0 | 0.697 | 0.697 |
| CACNA2D3 | CACNA1B  | 0 | 0     | 0 | 0.697 | 0.697 |

|          |          |       |       |   |       |       |
|----------|----------|-------|-------|---|-------|-------|
| CACNG2   | GRIN2B   | 0     | 0     | 0 | 0.697 | 0.697 |
| TRPV4    | PKD2     | 0     | 0     | 0 | 0.687 | 0.687 |
| ITPR2    | TRPM7    | 0     | 0     | 0 | 0.682 | 0.682 |
| TRPV6    | TRPM8    | 0     | 0     | 0 | 0.68  | 0.679 |
| TRPM1    | TRPV4    | 0     | 0     | 0 | 0.679 | 0.679 |
| TRPC4    | TRPA1    | 0     | 0     | 0 | 0.674 | 0.674 |
| TRPM1    | TRPA1    | 0     | 0     | 0 | 0.674 | 0.673 |
| TRPC3    | RYR1     | 0     | 0     | 0 | 0.67  | 0.669 |
| RYR1     | TRPC1    | 0     | 0     | 0 | 0.657 | 0.657 |
| CACNA1A  | CACNA2D3 | 0     | 0     | 0 | 0.653 | 0.653 |
| RYR2     | CACNA1D  | 0     | 0     | 0 | 0.648 | 0.648 |
| TRPV2    | TRPV1    | 0.919 | 0.62  | 0 | 0.931 | 0.648 |
| TRPV6    | TRPM2    | 0     | 0     | 0 | 0.644 | 0.643 |
| CACNA2D4 | CACNA1C  | 0     | 0     | 0 | 0.643 | 0.643 |
| GRIN2A   | CACNG2   | 0     | 0     | 0 | 0.642 | 0.642 |
| TRPM6    | TRPM7    | 0.939 | 0.62  | 0 | 0.985 | 0.642 |
| ITPR1    | TRPC5    | 0     | 0.559 | 0 | 0.233 | 0.639 |
| TRPC1    | TRPA1    | 0     | 0     | 0 | 0.637 | 0.637 |
| CACNA1I  | CATSPER2 | 0.646 | 0.62  | 0 | 0.176 | 0.636 |
| ITPR1    | ITPR3    | 0.954 | 0.62  | 0 | 0.927 | 0.636 |
| RYR2     | RYR1     | 0.957 | 0.62  | 0 | 0.992 | 0.636 |
| ITPR1    | ORAI1    | 0     | 0     | 0 | 0.636 | 0.635 |
| RYR3     | RYR2     | 0.96  | 0.62  | 0 | 0.988 | 0.635 |
| TRPM2    | TRPV5    | 0     | 0     | 0 | 0.634 | 0.633 |
| CACNA1I  | CATSPER1 | 0.56  | 0.62  | 0 | 0.133 | 0.632 |
| TRPM1    | CACNA2D3 | 0     | 0     | 0 | 0.632 | 0.631 |
| ITPR3    | TRPC5    | 0     | 0.548 | 0 | 0.233 | 0.63  |
| TRPM6    | TRPA1    | 0     | 0     | 0 | 0.629 | 0.629 |
| PANX1    | P2RX1    | 0     | 0     | 0 | 0.628 | 0.627 |
| CACNA2D4 | CACNA1A  | 0     | 0     | 0 | 0.621 | 0.621 |
| TRPM2    | TRPA1    | 0     | 0     | 0 | 0.62  | 0.619 |



|          |          |       |       |   |       |       |
|----------|----------|-------|-------|---|-------|-------|
| RYR2     | CACNA1G  | 0     | 0     | 0 | 0.614 | 0.614 |
| CACNB1   | RYR1     | 0     | 0     | 0 | 0.599 | 0.599 |
| TRPM3    | TRPV6    | 0     | 0     | 0 | 0.593 | 0.593 |
| TRPC5    | TRPM4    | 0     | 0     | 0 | 0.59  | 0.589 |
| ITPR3    | TRPC7    | 0     | 0.548 | 0 | 0.144 | 0.587 |
| TRPM6    | TRPV2    | 0     | 0     | 0 | 0.586 | 0.586 |
| TRPM6    | TRPV1    | 0     | 0     | 0 | 0.572 | 0.571 |
| CACNA1G  | CACNA2D3 | 0     | 0     | 0 | 0.568 | 0.568 |
| CACNA2D2 | CACNA1G  | 0     | 0     | 0 | 0.568 | 0.568 |
| ORAI1    | TRPC7    | 0     | 0     | 0 | 0.566 | 0.566 |
| TRPC3    | TRPC7    | 0.966 | 0.552 | 0 | 0.891 | 0.565 |
| TRPV2    | TRPC5    | 0     | 0     | 0 | 0.565 | 0.565 |
| TRPM8    | TRPV1    | 0.445 | 0     | 0 | 0.955 | 0.558 |
| TRPC3    | TRPV5    | 0     | 0     | 0 | 0.557 | 0.556 |
| TRPC3    | TRPM4    | 0.452 | 0     | 0 | 0.953 | 0.551 |
| CACNA1E  | CACNB2   | 0     | 0     | 0 | 0.539 | 0.539 |
| TMEM37   | TRPV5    | 0     | 0     | 0 | 0.53  | 0.53  |
| ORAI1    | TRPM7    | 0     | 0     | 0 | 0.528 | 0.528 |
| ITPR1    | CACNA1A  | 0     | 0     | 0 | 0.528 | 0.528 |
| ITPR1    | CACNA1D  | 0     | 0     | 0 | 0.522 | 0.522 |
| CACNA2D2 | CACNA1C  | 0     | 0     | 0 | 0.515 | 0.515 |
| ORAI1    | CACNA1C  | 0     | 0     | 0 | 0.505 | 0.505 |
| TRPM8    | TRPV3    | 0.486 | 0     | 0 | 0.917 | 0.502 |
| TRPC5    | PKD2     | 0     | 0     | 0 | 0.5   | 0.5   |
| TRPC3    | TRPM2    | 0.51  | 0     | 0 | 0.946 | 0.496 |
| TRPA1    | TRPV1    | 0.469 | 0     | 0 | 0.877 | 0.495 |
| TRPC5    | TRPA1    | 0     | 0     | 0 | 0.493 | 0.493 |
| ITPR3    | ORAI1    | 0     | 0     | 0 | 0.492 | 0.491 |
| ITPR2    | ORAI1    | 0     | 0     | 0 | 0.492 | 0.491 |
| RYR2     | CACNG1   | 0     | 0     | 0 | 0.486 | 0.486 |
| RYR3     | CACNG1   | 0     | 0     | 0 | 0.486 | 0.486 |

|          |          |       |   |   |       |       |
|----------|----------|-------|---|---|-------|-------|
| CACNG2   | CACNA1B  | 0     | 0 | 0 | 0.484 | 0.484 |
| TRPM1    | TRPC1    | 0.519 | 0 | 0 | 0.932 | 0.481 |
| CACNA2D2 | CACNA1I  | 0     | 0 | 0 | 0.481 | 0.481 |
| CACNA1I  | CACNA2D3 | 0     | 0 | 0 | 0.481 | 0.481 |
| TRPM8    | TRPV4    | 0.459 | 0 | 0 | 0.828 | 0.476 |
| CACNA2D4 | CACNB2   | 0     | 0 | 0 | 0.475 | 0.475 |
| CACNB2   | CACNA2D3 | 0     | 0 | 0 | 0.475 | 0.475 |
| CACNA1H  | CACNA2D3 | 0     | 0 | 0 | 0.474 | 0.474 |
| CACNA2D2 | CACNA1H  | 0     | 0 | 0 | 0.474 | 0.474 |
| TRPV2    | TRPA1    | 0.471 | 0 | 0 | 0.836 | 0.472 |
| ITPR2    | TRPV6    | 0     | 0 | 0 | 0.468 | 0.468 |
| TRPC4    | TRPV4    | 0.44  | 0 | 0 | 0.785 | 0.467 |
| ITPR1    | RYR1     | 0.451 | 0 | 0 | 0.797 | 0.466 |
| ITPR1    | TRPM2    | 0     | 0 | 0 | 0.465 | 0.465 |
| ITPR2    | TRPM2    | 0     | 0 | 0 | 0.465 | 0.465 |
| TRPM2    | TRPC7    | 0.507 | 0 | 0 | 0.876 | 0.464 |
| TRPM2    | TRPC5    | 0.524 | 0 | 0 | 0.907 | 0.464 |
| RYR3     | PSEN1    | 0     | 0 | 0 | 0.463 | 0.463 |
| CACNA1A  | CACNG1   | 0     | 0 | 0 | 0.463 | 0.463 |
| RYR2     | TRPC1    | 0     | 0 | 0 | 0.463 | 0.463 |
| TRPC4    | TRPM2    | 0.527 | 0 | 0 | 0.908 | 0.463 |
| RYR3     | CACNA1C  | 0     | 0 | 0 | 0.462 | 0.462 |
| RYR1     | CACNA1C  | 0     | 0 | 0 | 0.462 | 0.462 |
| TRPM6    | TRPV5    | 0.45  | 0 | 0 | 0.779 | 0.456 |
| ITPR2    | TRPV5    | 0     | 0 | 0 | 0.455 | 0.455 |
| TRPA1    | TRPV4    | 0.497 | 0 | 0 | 0.836 | 0.452 |
| TRPC5    | TRPV4    | 0.44  | 0 | 0 | 0.758 | 0.452 |
| CACNA2D3 | CACNA1C  | 0     | 0 | 0 | 0.447 | 0.447 |
| TRPV2    | TRPC1    | 0.471 | 0 | 0 | 0.786 | 0.445 |
| ITPR3    | TRPM7    | 0     | 0 | 0 | 0.444 | 0.443 |
| CACNA2D2 | CACNB2   | 0     | 0 | 0 | 0.444 | 0.443 |

|          |          |       |   |   |       |       |
|----------|----------|-------|---|---|-------|-------|
| TRPM7    | TRPC1    | 0.48  | 0 | 0 | 0.79  | 0.441 |
| TRPM2    | TRPC1    | 0.572 | 0 | 0 | 0.942 | 0.439 |
| TRPC4    | TRPV1    | 0.463 | 0 | 0 | 0.765 | 0.439 |
| TRPC4    | TRPM4    | 0.474 | 0 | 0 | 0.776 | 0.438 |
| CACNA2D3 | CACNG1   | 0     | 0 | 0 | 0.437 | 0.436 |
| CACNA2D4 | CACNG1   | 0     | 0 | 0 | 0.437 | 0.436 |
| TRPC3    | TRPA1    | 0.433 | 0 | 0 | 0.72  | 0.435 |
| TRPC7    | TRPM4    | 0     | 0 | 0 | 0.436 | 0.435 |
| TRPV6    | CACNA1D  | 0     | 0 | 0 | 0.434 | 0.434 |
| TRPM3    | ITPR3    | 0     | 0 | 0 | 0.433 | 0.433 |
| ITPR1    | TRPM3    | 0     | 0 | 0 | 0.433 | 0.433 |
| ITPR2    | TRPM3    | 0     | 0 | 0 | 0.433 | 0.433 |
| TRPC3    | TRPM7    | 0.485 | 0 | 0 | 0.78  | 0.432 |
| TRPM3    | ORA1     | 0     | 0 | 0 | 0.43  | 0.43  |
| TRPM7    | TRPV3    | 0.447 | 0 | 0 | 0.726 | 0.429 |
| TRPM7    | TRPV5    | 0.451 | 0 | 0 | 0.725 | 0.426 |
| CACNB1   | CACNA2D3 | 0     | 0 | 0 | 0.424 | 0.424 |
| CACNA1B  | TRPV1    | 0     | 0 | 0 | 0.424 | 0.424 |
| CACNB1   | CACNA2D4 | 0     | 0 | 0 | 0.424 | 0.424 |
| TRPV3    | TRPA1    | 0.534 | 0 | 0 | 0.836 | 0.423 |
| ITPR1    | GRIN2B   | 0     | 0 | 0 | 0.419 | 0.419 |
| ITPR3    | RYR1     | 0.451 | 0 | 0 | 0.709 | 0.417 |
| ITPR2    | RYR1     | 0.453 | 0 | 0 | 0.709 | 0.416 |
| TRPC4    | TRPV6    | 0.468 | 0 | 0 | 0.723 | 0.414 |
| ITPR1    | RYR3     | 0.45  | 0 | 0 | 0.703 | 0.414 |
| TPCN1    | TRPC1    | 0     | 0 | 0 | 0.413 | 0.413 |
| TRPM1    | TRPC3    | 0.495 | 0 | 0 | 0.757 | 0.413 |
| RYR3     | CACNA1G  | 0     | 0 | 0 | 0.41  | 0.41  |
| TRPC4    | TRPM7    | 0.513 | 0 | 0 | 0.776 | 0.41  |
| TRPM7    | CACNA1D  | 0     | 0 | 0 | 0.407 | 0.407 |
| CACNA2D2 | CACNG1   | 0     | 0 | 0 | 0.407 | 0.407 |

|         |         |       |   |   |       |       |
|---------|---------|-------|---|---|-------|-------|
| TRPM3   | TRPC1   | 0.485 | 0 | 0 | 0.728 | 0.405 |
| RYR3    | CACNA1H | 0     | 0 | 0 | 0.404 | 0.404 |
| TRPC7   | PKD2    | 0     | 0 | 0 | 0.403 | 0.402 |
| RYR3    | TRPM7   | 0     | 0 | 0 | 0.402 | 0.401 |
| CACNA1H | TRPM7   | 0     | 0 | 0 | 0.402 | 0.401 |
| TRPV6   | TRPM7   | 0.465 | 0 | 0 | 0.695 | 0.401 |

**Homology Score:** calculated based on the degree of homology of the interactors. **Experimental Score:** based on a list of significant protein interaction datasets, gathered from other protein-protein interaction databases: BIND, DIP, GRID, HPRD, IntAct, MINT, and PID; **Knowledge Score:** based on pathway and functional annotation databases: Biocarta, BioCyc, GO, KEGG, and Reactome; **Text Mining Score:** based on a list of significant protein interaction groups, extracted from the abstracts of scientific literature; **Combined Score:** computed by combining the probabilities from the different evidence channels, correcting for the probability of randomly observing an interaction. For a more detailed description refer to von Mering C et al.<sup>14</sup>.

1. Purcell S, Neale B, Todd-Brown K, Thomas L, Ferreira MA, Bender D, et al. PLINK: a tool set for whole-genome association and population-based linkage analyses. *Am J Hum Genet.* 2007; **81**(3): 559-75.
2. Price AL, Patterson NJ, Plenge RM, Weinblatt ME, Shadick NA, Reich D. Principal components analysis corrects for stratification in genome-wide association studies. *Nature genetics.* 2006; **38**(8): 904-9.
3. Browning SR, Browning BL. Rapid and accurate haplotype phasing and missing-data inference for whole-genome association studies by use of localized haplotype clustering. *Am J Hum Genet.* 2007; **81**(5): 1084-97.
4. Sklar P, Ripke S, Scott LJ, Andreassen OA, Cichon S, Craddock N, et al. Large-scale genome-wide association analysis of bipolar disorder identifies a new susceptibility locus near ODZ4. *Nat Genet.* 2011.
5. Ripke S, Sanders AR, Kendler KS, Levinson DF, Sklar P, Holmans PA, et al. Genome-wide association study identifies five new schizophrenia loci. *Nat Genet.* 2011.
6. Lee PH, Bergen SE, Perlis RH, Sullivan PF, Sklar P, Smoller JW, et al. Modifiers and subtype-specific analyses in whole-genome association studies: a likelihood framework. *Human heredity.* 2011; **72**(1): 10-20.
7. Huang J, Perlis RH, Lee PH, Rush AJ, Fava M, Sachs GS, et al. Cross-Disorder Genomewide Analysis of Schizophrenia, Bipolar Disorder, and Depression. *Am J Psychiatry.* 2010.
8. Lee PH, O'Duslaine C, Thomas B, Purcell S. INRICH: Interval-based enrichment analysis for genome wide association studies. in prep.
9. Subramanian A, Tamayo P, Mootha VK, Mukherjee S, Ebert BL, Gillette MA, et al. Gene set enrichment analysis: a knowledge-based approach for interpreting genome-wide expression profiles. *Proceedings of the National Academy of Sciences of the United States of America.* 2005; **102**(43): 15545-50.
10. Nicolae D, Gamazon E, Zhang W, Duan S, Dolan ME, Cox NJ. Trait-Associated SNPs Are More Likely to Be eQTLs: Annotation to Enhance Discovery from GWAS. *PLoS Genet.* 2010; **6**(4): e1000888.
11. Myers A, Gibbs JR, Webster JA, Rohrer K, Zhao A, Marlowe L, Kaleem M, Leung D, Bryden L, Nath P, Zismann VL, Joshipura K, Huentelman MJ, Hu-Lince D, Coon KD, Craig DW, Pearson JV, Holmans P, Heward CB, Reiman EM, Stephan D, Hardy J. A survey of genetic human cortical gene expression. *Nat Genet.* 2007; **39**(12): 1494-9.
12. Webster J, Gibbs JR, Clarke J, Ray M, Zhang W, Holmans P, Rohrer K, Zhao A, Marlowe L, Kaleem M, McCorquodale DS 3rd, Cuello C, Leung D, Bryden L, Nath P, Zismann VL, Joshipura K, Huentelman MJ, Hu-Lince D, Coon KD, Craig DW, Pearson JV; NACC-Neuropathology Group, Heward CB, Reiman EM, Stephan D, Hardy J, Myers AJ. Genetic Control of Human Brain Transcript Expression in Alzheimer Disease. *Am J Hum Genet.* 2009; **84**(4): 445-58.
13. Colantuoni C, Lipska BK, Ye T, Hyde TM, Tao R, Leek JT, Colantuoni EA, Elkahlon AG, Herman MM, Weinberger DR, Kleinman JE. Temporal dynamics and genetic control of transcription in the human prefrontal cortex. *Nature.* 2011; **478**(7370): 519-23.
14. Schadt E, Molony C, Chudin E, Hao K, Yang X, Lum PY, Kasarskis A, Zhang B, Wang S, Suver C, Zhu J, Millstein J, Sieberts S, Lamb J, GuhaThakurta D, Derry J, Storey JD, Avila-Campillo I, Kruger MJ, Johnson JM, Rohl CA, van Nas A, Mehrabian M, Drake

- TA, Lusk AJ, Smith RC, Guengerich FP, Strom SC, Schuetz E, Rushmore TH, Ulrich R. Mapping the genetic architecture of gene expression in human liver. *PLoS Biol.* 2008; **6**(5): e107.
15. Ding J, Gudjonsson JE, Liang L, Stuart PE, Li Y, Chen W, Weichenthal M, Ellinghaus E, Franke A, Cookson W, Nair RP, Elder JT, Abecasis GR. Gene Expression in Skin and Lymphoblastoid Cells: Refined Statistical Method Reveals Extensive Overlap in cis-eQTL Signals. *Am J Hum Genet.* 2010; **87**(6): 779-89.
16. Stranger B, Nica AC, Forrest MS, Dimas A, Bird CP, Beazley C, Ingle CE, Dunning M, Flicek P, Koller D, Montgomery S, Tavaré S, Deloukas P, Dermitzakis ET. Population genomics of human gene expression. *Nat Genet.* 2007; **39**(10): 1217-24.
17. Burnham KP, Anderson DR. *Model Selection and Multimodel Inference: A Practical Information-Theoretic Approach*, 2nd Ed. New York: Springer-Verlag New York, Inc.; 2002.

| PGC Workgroup(s)                 | First name  | Last name          | Affiliation                                                                                                                                                                                                                                                                                                                                                         | Country            | email                                                                   |
|----------------------------------|-------------|--------------------|---------------------------------------------------------------------------------------------------------------------------------------------------------------------------------------------------------------------------------------------------------------------------------------------------------------------------------------------------------------------|--------------------|-------------------------------------------------------------------------|
| CDG                              | Jordan W.   | Smoller; MD; ScD*  | Psychiatric and Neurodevelopmental Genetics Unit, Massachusetts General Hospital; Stanley Center for Psychiatric Research, Broad Institute, Boston, MA                                                                                                                                                                                                              | USA                | jsmoller@hms.harvard.edu                                                |
| CDG; Analysis; SCZ               | Stephan     | Ripke; MD*         | Analytic and Translational Genetics Unit, Massachusetts General Hospital and Harvard Medical School, Boston, Massachusetts, USA.; Stanley Center for Psychiatric Research, Broad Institute of MIT and Harvard, Cambridge, Massachusetts, USA.                                                                                                                       | USA                | ripke@chgr.mgh.harvard.edu                                              |
| Analysis, BPD, SCZ<br>CDG; ADHD; | Phil Hyoun  | Lee; PhD           | Psychiatric and Neurodevelopmental Genetics Unit, Massachusetts General Hospital; Boston, MA                                                                                                                                                                                                                                                                        | USA                | phlee@pngu.mgh.harvard.edu                                              |
| Analysis, SCZ                    | Benjamin    | Neale; PhD         | Massachusetts General Hospital/Broad Institute                                                                                                                                                                                                                                                                                                                      | USA                | bneale@broadinstitute.org                                               |
| CDG; BPD                         | John I.     | Nurnberger; MD     | Indiana University                                                                                                                                                                                                                                                                                                                                                  | USA                | jnurnber@iupui.edu                                                      |
| CDG; ASD                         | Susan       | Santangelo; PhD    | Massachusetts General Hospital                                                                                                                                                                                                                                                                                                                                      | USA                | ssantangelo@pngu.mgh.harvard.edu                                        |
| CDG; MDD; SCZ                    | Patrick F.  | Sullivan; MD       | University of North Carolina at Chapel Hill                                                                                                                                                                                                                                                                                                                         | USA                | pfsulliv@med.unc.edu                                                    |
| CDG                              | Roy H.      | Perlis, MD, MSc    | Psychiatric and Neurodevelopmental Genetics Unit, Massachusetts General Hospital; Stanley Center for Psychiatric Research, Broad Institute, Boston, MA                                                                                                                                                                                                              | USA                | rperlis@partners.org                                                    |
| Analysis, BPD, SCZ, CDG          | Shaun M     | Purcell, PhD       | Division of Psychiatric Genomics, Department of Psychiatry, Mount Sinai School of Medicine, New York, New York, USA.; Analytic and Translational Genetics Unit, Massachusetts General Hospital and Harvard Medical School, Boston, Massachusetts, USA.; Stanley Center for Psychiatric Research, Broad Institute of MIT and Harvard, Cambridge, Massachusetts, USA. | USA                | shaun@atgu.mgh.harvard.edu                                              |
| CDG, SCZ                         | Ayman       | Fanous             | Washington VA Medical Center; Department of Psychiatry; Georgetown University School of Medicine; Washington; DC; USA; Department of Psychiatry; Virginia Commonwealth University School of Medicine; Richmond; Virginia; USA                                                                                                                                       | USA                | ahfanous@vcu.edu                                                        |
| CDG, Analysis                    | Michael C.  | Neale, PhD         | Virginia Institute for Psychiatric and Behavioral Genetics, Virginia Commonwealth University                                                                                                                                                                                                                                                                        | USA                | neale@vcu.edu                                                           |
| CDG; MDD; SCZ; BPD               | Marcella    | Rietschel, MD      | Central Institute of Mental Health, Medical Faculty Mannheim, Univ. of Heidelberg<br>J5, 68159 Mannheim, Germany                                                                                                                                                                                                                                                    | Germany            | marcella.rietschel@zi-mannheim.de                                       |
| CDG; MDD; SCZ; BPD               | Thomas G.   | Schulze            | (1) Department of Psychiatry & Psychotherapy; University of Göttingen; Göttingen; (2) Department of Psychiatry & Behavioral Sciences; Johns Hopkins University; Baltimore; MD                                                                                                                                                                                       | 1) Germany; 2) USA | 1) thomas.schulze@med.uni-goettingen.de;<br>2) thomas_g_schulze@jhu.edu |
| CDG, ADHD                        | Anita       | Thapar, MD         | Institute of Psychological Medicine and Clinical Neurosciences, MRC Centre in Neuropsychiatric Genetics and Genomics, Cardiff University School of Medicine                                                                                                                                                                                                         | UK                 | Thapar@cardiff.ac.uk                                                    |
| ASD; ADHD                        | Richard     | Anney; PhD         | Trinity College Dublin                                                                                                                                                                                                                                                                                                                                              | Ireland            | anney@TCD.IE                                                            |
| ADHD                             | Jan K.      | Buitelaar; MD; PhD | Radboud University Medical Center; Donders Institute for Brain; Cognition and Behaviour; department of Cognitive Neuroscience; Nijmegen; The Netherlands                                                                                                                                                                                                            | NL                 | j.buitelaar@psy.umcn.nl                                                 |
| PGC Coordinating Committee; ADHD | Stephen V.  | Faraone, Ph.D.     | SUNY Upstate Medical University                                                                                                                                                                                                                                                                                                                                     | USA                | sfaraone@childpsychresearch.org                                         |
| MDD                              | Witte J     | Hoogendijk         | Erasmus Medical Center                                                                                                                                                                                                                                                                                                                                              | The Netherlands    | w.hoogendijk@erasmusmc.nl                                               |
| MDD, SCZ, Coordinating Committee | Douglas F   | Levinson           | Department of Psychiatry and Behavioral Sciences; Stanford University; Stanford; California; USA                                                                                                                                                                                                                                                                    | USA                | dflev@stanford.edu                                                      |
| ADHD                             | Klaus-Peter | Lesch; MD          | University of Wuerzburg                                                                                                                                                                                                                                                                                                                                             | Germany            | kplesch@mail.uni-wuerzburg.de                                           |
| PGC                              | Brien       | Riley              | Depts. of Psychiatry and Human & Molecular Genetics, Virginia Institute of Psychiatric and Behavioral Genetics, Virginia Commonwealth University, Richmond VA                                                                                                                                                                                                       | USA                | bpriley@vcu.edu                                                         |
| ADHD                             | Russell     | Schachar           | The Hospital for Sick Children, University of Toronto                                                                                                                                                                                                                                                                                                               | Canada             | russell.schachar@sickkids.ca                                            |
| ADHD                             | Edmund      | Sonuga-Barke PhD   | Developmental Brain & Behaviour Laboratory, Psychology University of Southampton; Department of Experimental Clinical & Health Psychology, Ghent University                                                                                                                                                                                                         | UK                 | ejb3@soton.ac.uk                                                        |
| BPD                              | Devin       | Absher             | HudsonAlpha Institute for Biotechnology, Huntsville, Alabama, USA.                                                                                                                                                                                                                                                                                                  | USA                |                                                                         |
| SCZ                              | Ingrid      | Agartz             | KG Jebsen Centre for Psychosis Research, Institute of Clinical Medicine; University of Oslo; Department of Research; Diakonhjemmet Hospital; Oslo; Norway                                                                                                                                                                                                           | Norway             | ingrid.agartz@medisin.uio.no                                            |
| BPD                              | Huda        | Akil               | Molecular and Behavioral Neuroscience Institute, University of Michigan, Ann Arbor, Michigan, USA.                                                                                                                                                                                                                                                                  | USA                |                                                                         |
| SCZ                              | Farooq      | Amin               | Department of Psychiatry and Behavioral Sciences; Emory University and Atlanta Veterans Affairs Medical Center; Atlanta; Georgia; USA                                                                                                                                                                                                                               | USA                | famin@emory.edu                                                         |
| SCZ, BPD                         | Ole A       | Andreassen         | KG Jebsen Centre for Psychosis Research; Institute of Clinical Medicine; University of Oslo; Division of Mental Health and Addiction, Oslo University Hospital, Oslo, Norway                                                                                                                                                                                        | Norway             | o.a.andreassen@medisin.uio.no                                           |
| BPD                              | Adebayo     | Anjorin            | Molecular Psychiatry Laboratory, Mental Health Sciences Unit, University College London, London, UK.                                                                                                                                                                                                                                                                | UK                 |                                                                         |
| ASD                              | Dan         | Arking; PhD        | Johns Hopkins University                                                                                                                                                                                                                                                                                                                                            | USA                | arking@JHMI.EDU                                                         |
| ADHD                             | Philip      | Asherson MD        | King's College London, Institute of Psychiatry                                                                                                                                                                                                                                                                                                                      | UK                 | philip.asherson@kcl.ac.uk                                               |
| SCZ                              | Maria H.    | Azevedo, MD        | Faculty of Medicine, University of Coimbra, Coimbra, Portugal                                                                                                                                                                                                                                                                                                       | Portugal           | mazevedo@fmed.uc.pt                                                     |
| BPD                              | Lena        | Backlund           | Department of Clinical Neuroscience, Karolinska Institutet, Stockholm, Sweden.                                                                                                                                                                                                                                                                                      | Sweden             |                                                                         |
| BPD                              | Judith A    | Badner             | Department of Psychiatry, University of Chicago, Chicago, Illinois, USA.                                                                                                                                                                                                                                                                                            | USA                |                                                                         |
| ADHD                             | Tobias      | Banaschewski       | Department of Child and Adolescent Psychiatry; Central Institute of Mental Health; Medical Faculty Mannheim, University of Heidelberg; Mannheim; Germany                                                                                                                                                                                                            | Germany            | tobias.banaschewski@zi-mannheim.de                                      |
| BPD                              | Jack D      | Barchas            | Department of Psychiatry, Weill Medical College, Cornell University, New York, New York, USA.                                                                                                                                                                                                                                                                       | USA                |                                                                         |
| MDD                              | Michael R   | Barnes             | GlaxoSmithKline                                                                                                                                                                                                                                                                                                                                                     | UK                 | dr.michael.r.barnes@gmail.com                                           |

|                                                 |             |                  |                                                                                                                                                                                                                                                                                                        |                 |                             |
|-------------------------------------------------|-------------|------------------|--------------------------------------------------------------------------------------------------------------------------------------------------------------------------------------------------------------------------------------------------------------------------------------------------------|-----------------|-----------------------------|
| BPD                                             | Thomas B    | Barrett          | Portland Veterans Affairs Medical Center, Portland, Oregon, USA.                                                                                                                                                                                                                                       | USA             |                             |
| SCZ, BPD                                        | Nicholas    | Bass             | Molecular Psychiatry Laboratory; Research Department of Mental Health Sciences; University College London Medical School; Windeyer Institute of Medical Sciences; London; England; UK                                                                                                                  | UK              | rejunjb@ucl.ac.uk           |
| BPD                                             | Michael     | Bauer            | Department of Psychiatry and Psychotherapy; ENBREC Group; University Hospital Carl Gustav Carus; Dresden; Germany.                                                                                                                                                                                     | Germany         |                             |
| BPD                                             | Frank       | Bellivier        | INSERM, U955, Psychiatrie Génétique, Créteil, France.; Université Paris Est, Faculté de Médecine, Créteil, France.; Assistance Publique-Hôpitaux de Paris (AP-HP); Hôpital H. Mondor-A. Chenevier; Département de Psychiatrie; Créteil; France.; ENBREC group; Fondation Fondamental; Créteil; France. | France          |                             |
| BPD                                             | Sarah E     | Bergen           | Analytic and Translational Genetics Unit, Massachusetts General Hospital and Harvard Medical School, Boston, Massachusetts, USA.; Stanley Center for Psychiatric Research, Broad Institute of MIT and Harvard, Cambridge, Massachusetts, USA.                                                          | USA             | sbergen@broadinstitute.org  |
| BPD                                             | Wade        | Berrettini       | Department of Psychiatry, University of Pennsylvania, Philadelphia, Pennsylvania, USA.                                                                                                                                                                                                                 | USA             | wadeb@mail.med.upenn.edu    |
| MDD                                             | Thomas      | Bettecken        | Max Planck Institute of Psychiatry; Munich                                                                                                                                                                                                                                                             | Germany         | bettecken@mpipsykl.mpg.de   |
| ADHD                                            | Joseph      | Biederman; MD    | Massachusetts General Hospital; Harvard Medical School                                                                                                                                                                                                                                                 | USA             | jbiederman@partners.org     |
| MDD                                             | Elisabeth B | Binder           | Max Planck Institute of Psychiatry; Munich                                                                                                                                                                                                                                                             | Germany         | binder@mpipsykl.mpg.de      |
| SCZ                                             | Donald W    | Black            | Department of Psychiatry; University of Iowa Carver College of Medicine; Iowa City; Iowa; USA                                                                                                                                                                                                          | USA             | donald-black@uiowa.edu      |
| SCZ, BPD, MDD                                   | Douglas H R | Blackwood        | Division of Psychiatry; University of Edinburgh; Royal Edinburgh Hospital; Edinburgh; Scotland; UK                                                                                                                                                                                                     | UK              | d.blackwood@ed.ac.uk        |
| BPD                                             | Cinnamon S  | Bloss            | The Scripps Translational Science Institute and Scripps Health, La Jolla, California, USA.                                                                                                                                                                                                             | USA             |                             |
| BPD                                             | Michael     | Boehnke          | Department of Biostatistics and Center for Statistical Genetics, School of Public Health, University of Michigan, Ann Arbor, Michigan, USA.                                                                                                                                                            | USA             |                             |
| MDD                                             | Dorret I    | Boomsma          | VU University; Amsterdam                                                                                                                                                                                                                                                                               | The Netherlands | dorret@psy.vu.nl;           |
| BPD, MDD                                        | Gerome      | Breen            | Social, Genetic and Developmental Psychiatry (SGDP) Centre, The Institute of Psychiatry, King's College London, De Crespigny Park Denmark Hill, London, UK.; University of Aberdeen, Institute of Medical Sciences, Foresterhill, Aberdeen, UK.                                                        | UK              | gerome.breen@kcl.ac.uk      |
| MDD; BPD                                        | René        | Breuer           | Department of Genetic Epidemiology in Psychiatry; Central Institute of Mental Health; University of Heidelberg; Mannheim; Germany                                                                                                                                                                      | Germany         | rene.breuer@zi-mannheim.de  |
| SCZ                                             | Nancy G     | Buccola          | School of Nursing; Louisiana State University Health Sciences Center; New Orleans; Louisiana; USA                                                                                                                                                                                                      | USA             | NBucco@lsuhsc.edu           |
| BPD                                             | William E   | Bunner           | Department of Psychiatry and Human Behavior, University of California, Irvine, California, USA.                                                                                                                                                                                                        | USA             |                             |
| BPD                                             | Margit      | Burmeister       | Department of Human Genetics, Department of Psychiatry, Molecular and Behavioral Neuroscience Institute, University of Michigan, Ann Arbor, Michigan, USA.                                                                                                                                             | USA             |                             |
| ASD                                             | Joseph D    | Buxbaum; PhD     | Mt. Sinai School of Medicine                                                                                                                                                                                                                                                                           | USA             | joseph.buxbaum@MSSM.EDU     |
| BPD, SCZ                                        | William F   | Byerley          | Department of Psychiatry; University of California at San Francisco and NCIRE (Northern California Institute for Research And Education); San Francisco; California; USA                                                                                                                               | USA             | william.byerley@ucsf.edu    |
| BPD                                             | Sian        | Caesar           | Department of Psychiatry, School of Clinical and Experimental Medicine, Birmingham University, Birmingham, UK.                                                                                                                                                                                         | UK              |                             |
| SCZ                                             | Rita M      | Cantor           | UCLA Center for Neurobehavioral Genetics; University of California at Los Angeles; Department of Human Genetics; University of California at Los Angeles; Los Angeles; California; USA                                                                                                                 | USA             | RCantor@mednet.ucla.edu     |
| ASD                                             | Aravinda    | Chakravarti; PhD | Johns Hopkins University                                                                                                                                                                                                                                                                               | USA             | aravinda@JHMI.EDU           |
| BPD                                             | Kim         | Chambert         | Stanley Center for Psychiatric Research, Broad Institute of MIT and Harvard, Cambridge, Massachusetts, USA.                                                                                                                                                                                            | USA             |                             |
| SCZ                                             | Khalid      | Choudhury, PhD   | University College London                                                                                                                                                                                                                                                                              | UK              | khalid.choudhury@ucl.ac.uk  |
| MDD; BPD; SCZ                                   | Sven        | Cichon           | (1) Dept. of Genomics; Life & Brain Center; University of Bonn; Bonn; (2) Institute of Neuroscience and Medicine (INM-1); Research Center Juelich; Juelich; (3) Institute of Human Genetics; University of Bonn; Bonn; Germany                                                                         | Germany         | sven.cichon@uni-bonn.de     |
| SCZ                                             | C. Robert   | Cloninger, MD    | Washington University                                                                                                                                                                                                                                                                                  | USA             | crcloninger44@gmail.com     |
| BPD                                             | David A     | Collier          | Social; Genetic and Developmental Psychiatry Centre; Institute of Psychiatry; King's College; London; England; UK                                                                                                                                                                                      | UK              | David.Collier@iop.kcl.ac.uk |
| ASD                                             | Edwin       | Cook; MD         | University of Illinois                                                                                                                                                                                                                                                                                 | USA             | ecook@PSYCH.UIC.EDU         |
| ASD                                             | Hilary      | Coon; PhD        | University of Utah                                                                                                                                                                                                                                                                                     | USA             | hilary.coon@UTAH.EDU        |
| BPD, SCZ                                        | Aiden       | Corvin           | Neuropsychiatric Genetics Research Group; Department of Psychiatry and Institute of Molecular Medicine; Trinity College Dublin; Dublin; Ireland                                                                                                                                                        | Ireland         | acorvin@tcd.ie              |
| BPD, MDD                                        | William H   | Coryell          | University of Iowa                                                                                                                                                                                                                                                                                     | USA             | william-coryell@uiowa.edu   |
| BPD                                             | David W     | Craig            | The Translational Genomics Research Institute, Phoenix, Arizona, USA.                                                                                                                                                                                                                                  | USA             |                             |
| MDD                                             | Ian W       | Craig            | Institute of Psychiatry; King's College London                                                                                                                                                                                                                                                         | UK              | ian.craig@kcl.ac.uk         |
| SCZ                                             | David       | Curtis, MD, PhD  | East London NHS Foundation Trust/QMUL                                                                                                                                                                                                                                                                  | UK              | davidcurtis@nhs.net         |
| MDD                                             | Darina      | Czamara          | Max Planck Institute of Psychiatry; Munich                                                                                                                                                                                                                                                             | Germany         | darina@mpipsykl.mpg.de      |
| Analysis, ASD, BPD, SCZ, Coordinating Committee | Mark        | Daly             | Analytic and Translational Genetics Unit, Massachusetts General Hospital and Harvard Medical School, Boston, Massachusetts, USA.; Stanley Center for Psychiatric Research, Broad Institute of MIT and Harvard, Cambridge, Massachusetts, USA.                                                          | USA             | mjdaly@atgu.mgh.harvard.edu |
| SCZ                                             | Susmita     | Datta, PhD       | University College London                                                                                                                                                                                                                                                                              | UK              | sdatta@hotmail.com          |
| BPD                                             | Richard     | Day              | Division of Neuroscience, Medical Research Institute, University of Dundee, Ninewells Hospital & Medical School, Dundee, UK.                                                                                                                                                                           | IL              |                             |
| MDD                                             | Eco J       | De Geus          | VU University; Amsterdam                                                                                                                                                                                                                                                                               | The Netherlands | eco@psy.vu.nl               |



|                      |                                                    |                                 |                                                                                                                                                                                                                                                                                                                      |                            |                                                       |
|----------------------|----------------------------------------------------|---------------------------------|----------------------------------------------------------------------------------------------------------------------------------------------------------------------------------------------------------------------------------------------------------------------------------------------------------------------|----------------------------|-------------------------------------------------------|
| MDD; BPD<br>ASD      | Franziska<br>Bernie                                | Degenhardt<br>Devlin; PhD       | (1) Dept. of Genomics; Life & Brain Center; University of Bonn; Bonn;<br>(2) Institute of Human Genetics; University of Bonn; Bonn; Germany<br>University of Pennsylvania                                                                                                                                            | Germany<br>USA             | franziska.degenhardt@uni-bonn.de<br>devlinbj@UPMC.EDU |
| BPD, SCZ             | Srdjan                                             | Djurovic                        | KG Jebsen Centre for Psychosis Research, Institute of Clinical Medicine,<br>University of Oslo, Oslo, Norway.; Department of Medical Genetics, Oslo<br>University Hospital, Oslo, Norway.                                                                                                                            | Norway                     | srdjan.djurovic@medisin.uio.no                        |
| ADHD                 | Alysa E.                                           | Doyle                           | Psychiatric and Neurodevelopmental Genetics Unit, Massachusetts<br>General Hospital and Harvard Medical School, Boston, Massachusetts,<br>USA.                                                                                                                                                                       | USA                        | doylea@helix.mgh.harvard.edu                          |
| SCZ                  | Jubao                                              | Duan                            | Department of Psychiatry and Behavioral Sciences; NorthShore<br>University HealthSystem and University of Chicago; Evanston; Illinois;<br>USA                                                                                                                                                                        | USA                        | jduan@northshore.org                                  |
| BPD, SCZ             | Frank                                              | Dudbridge                       | Department of Non-communicable Disease Epidemiology; London<br>School of Hygiene and Tropical Medicine; London; England; UK                                                                                                                                                                                          | UK                         | frank.dudbridge@lshtm.ac.uk                           |
| BPD                  | Howard J                                           | Edenberg                        | Department of Biochemistry and Molecular Biology, Department of<br>Medical and Molecular Genetics, Indiana University School of Medicine,<br>Indianapolis, Indiana, USA.; Department of Medical and Molecular<br>Genetics, Indiana University School of Medicine, Indianapolis, Indiana,<br>USA.                     | USA                        |                                                       |
| BPD                  | Amanda                                             | Elkin                           | Social, Genetic and Developmental Psychiatry (SGDP) Centre, The<br>Institute of Psychiatry, King's College London, De Crespigny Park<br>Denmark Hill, London, UK.                                                                                                                                                    | UK                         |                                                       |
| BPD                  | Bruno                                              | Etain                           | INSERM, U955, Psychiatrie Génétique, Créteil, France.; Université Paris<br>Est, Faculté de Médecine, Créteil, France.; Assistance Publique-Hôpitaux<br>de Paris (AP-HP); Hôpital H. Mondor-A. Chenevier; Département de<br>Psychiatrie; Créteil; France.; ENBREC group; Fondation Fondamental;<br>Créteil; France.   | France                     |                                                       |
| BPD, MDD             | Anne E                                             | Farmer                          | Social, Genetic and Developmental Psychiatry (SGDP) Centre, The<br>Institute of Psychiatry, King's College London, De Crespigny Park<br>Denmark Hill, London, UK.                                                                                                                                                    | UK                         | anne.farmer@kcl.ac.uk                                 |
| BPD                  | Manuel A                                           | Ferreira                        | Queensland Institute of Medical Research, Brisbane, Australia.                                                                                                                                                                                                                                                       | Australia                  |                                                       |
| BPD                  | I Nicol                                            | Ferrier                         | Division of Neuroscience, Medical Research Institute, University of<br>Dundee, Ninewells Hospital & Medical School, Dundee, UK.                                                                                                                                                                                      | UK                         |                                                       |
| BPD                  | Matthew                                            | Flickinger                      | Department of Biostatistics and Center for Statistical Genetics, School of<br>Public Health, University of Michigan, Ann Arbor, Michigan, USA.                                                                                                                                                                       | USA                        |                                                       |
| BPD                  | Tatiana                                            | Foroud                          | Department of Medical and Molecular Genetics, Indiana University<br>School of Medicine, Indianapolis, Indiana, USA.                                                                                                                                                                                                  | USA                        |                                                       |
| MDD; BPD             | Josef                                              | Frank                           | Department of Genetic Epidemiology in Psychiatry; Central Institute of<br>Mental Health; University of Heidelberg; Mannheim; Germany<br>Radboud University Medical Centre; Donders Institute for Brain;<br>Cognition and Behaviour; departments of Human Genetics (855) and<br>Psychiatry; Nijmegen; The Netherlands | Germany<br>The Netherlands | josef.frank@zi-mannheim.de<br>b.franke@gen.umcn.nl    |
| ADHD                 | Barbara                                            | Franke; PhD                     | Medical Research Council (MRC) Centre for Neuropsychiatric Genetics<br>and Genomics, Henry Wellcome Building, School of Medicine, Cardiff<br>University, Heath Park, Cardiff, UK.                                                                                                                                    | UK                         |                                                       |
| BPD                  | Christine                                          | Fraser                          | Department of Psychiatry; University of Colorado Denver; Aurora;<br>Colorado; USA                                                                                                                                                                                                                                    | USA                        | Robert.Freedman@ucdenver.edu                          |
| SCZ                  | Robert                                             | Freedman                        | UCLA Center for Neurobehavioral Genetics; University of California at<br>Los Angeles; Los Angeles; California; USA                                                                                                                                                                                                   | USA                        | rfreimer@mednet.ucla.edu                              |
| SCZ                  | Nelson B                                           | Freimer                         | Molecular and Clinical Neurobiology; Department of Psychiatry; Ludwig-<br>Maximilians-University; Munich; Germany                                                                                                                                                                                                    | Germany                    | Marion.Friedl@med.uni-muenchen.de                     |
| SCZ                  | Marion                                             | Friedl                          | Department of Molecular Medicine, Karolinska Institutet, Stockholm,<br>Sweden.                                                                                                                                                                                                                                       | Sweden                     |                                                       |
| BPD                  | Louise                                             | Frisén                          | Department of Psychiatry and Behavioral Sciences; NorthShore<br>University HealthSystem and University of Chicago; Evanston; Illinois;<br>USA                                                                                                                                                                        | USA                        | pgejman@northshore.org                                |
| SCZ                  | Pablo V                                            | Gejman                          | MRC Centre for Neuropsychiatric Genetics and Genomics; Department<br>of Psychological Medicine and Neurology; School of Medicine; Cardiff<br>University; Cardiff; Wales; UK                                                                                                                                          | UK                         | georgievaln1@cardiff.ac.uk                            |
| SCZ                  | Lyudmila                                           | Georgieva                       | Institute for Medical Biometry, Informatics and Epidemiology, University<br>of Bonn, Bonn, Germany.                                                                                                                                                                                                                  | Germany                    |                                                       |
| BPD                  | Elliot S                                           | Gershon                         | Molecular and Clinical Neurobiology; Department of Psychiatry; Ludwig-<br>Maximilians-University; Munich; Germany                                                                                                                                                                                                    | Germany                    | Ina.Giegling@med.uni-muenchen.de                      |
| SCZ                  | Ina                                                | Giegling                        | Neuropsychiatric Genetics Research Group, Department of Psychiatry<br>and Institute of Molecular Medicine, Trinity College Dublin, Dublin,<br>Ireland.                                                                                                                                                               | Ireland                    | mgill@TCD.IE                                          |
| ASD, BPD, SCZ<br>MDD | Michael<br>Scott D                                 | Gill; MD<br>Gordon              | Queensland Institute of Medical Research                                                                                                                                                                                                                                                                             | Australia                  | scott.gordon@qimr.edu.au                              |
| BPD                  | Katherine                                          | Gordon-Smith                    | Medical Research Council (MRC) Centre for Neuropsychiatric Genetics<br>and Genomics, Henry Wellcome Building, School of Medicine, Cardiff<br>University, Heath Park, Cardiff, UK.; Department of Psychiatry, School of<br>Clinical and Experimental Medicine, Birmingham University,<br>Birmingham, UK.              | UK                         |                                                       |
| BPD                  | Elaine K                                           | Green                           | Medical Research Council (MRC) Centre for Neuropsychiatric Genetics<br>and Genomics, Henry Wellcome Building, School of Medicine, Cardiff<br>University, Heath Park, Cardiff, UK.                                                                                                                                    | UK                         |                                                       |
| BPD<br>SCZ           | Tiffany A<br>The Genetic Risk Outcome of Psychosis | Greenwood<br>(GROUP) Consortium | Neurosciences Centre of Excellence in Drug Discovery, GlaxoSmithKline<br>Research and Development, Verona, Italy.                                                                                                                                                                                                    | Italy                      |                                                       |
| MDD                  | Magdalena                                          | Gross                           | Dept. of Psychiatry; University of Bonn; Bonn; Germany                                                                                                                                                                                                                                                               | Germany                    | m.gross@uni-bonn.de                                   |
| BPD                  | Detelina                                           | Grozeva                         | Medical Research Council (MRC) Centre for Neuropsychiatric Genetics<br>and Genomics, Henry Wellcome Building, School of Medicine, Cardiff<br>University, Heath Park, Cardiff, UK.                                                                                                                                    | UK                         |                                                       |

|          |             |              |                                                                                                                                                                                                                                                                                                        |                 |                                      |
|----------|-------------|--------------|--------------------------------------------------------------------------------------------------------------------------------------------------------------------------------------------------------------------------------------------------------------------------------------------------------|-----------------|--------------------------------------|
| BPD      | Weihua      | Guan         | Department of Biostatistics and Center for Statistical Genetics, School of Public Health, University of Michigan, Ann Arbor, Michigan, USA.                                                                                                                                                            | USA             |                                      |
| BPD, SCZ | Hugh        | Gurling      | Molecular Psychiatry Laboratory; Research Department of Mental Health Sciences; University College London Medical School; Windeyer Institute of Medical Sciences; London; England; UK                                                                                                                  | UK              | h.gurling@ucl.ac.uk                  |
| BPD      | Ómar        | Gustafsson   | deCODE Genetics, Sturlugata 8 101 Reykjavik, Iceland.                                                                                                                                                                                                                                                  | Iceland         |                                      |
| ASD      | Hakon       | Hakonarson   | The Center for Applied Genomics, The Children's Hospital of Philadelphia, Philadelphia, PA                                                                                                                                                                                                             | USA             | hakonarson@email.chop.edu            |
| MDD      | Steven P    | Hamilton     | Department of Pediatrics, The Perelman School of Medicine, University of Pennsylvania, Philadelphia, PA                                                                                                                                                                                                | USA             | steve.hamilton@ucsf.edu              |
| BPD, SCZ | Marian L    | Hamshere     | Medical Research Council (MRC) Centre for Neuropsychiatric Genetics and Genomics, Henry Wellcome Building, School of Medicine, Cardiff University, Heath Park, Cardiff, UK.; Biostatistics and Bioinformatics Unit, Cardiff University School of Medicine, Cardiff, UK.                                | UK              | HamshereML@cardiff.ac.uk             |
| SCZ      | Thomas F    | Hansen       | Institute of Biological Psychiatry; MHC Sct. Hans; Copenhagen University Hospital; Roskilde; Denmark                                                                                                                                                                                                   | Denmark         | thomas.hansen@regionh.dk             |
| SCZ      | Annette M   | Hartmann     | Molecular and Clinical Neurobiology; Department of Psychiatry; Ludwig-Maximilians-University; Munich; Germany                                                                                                                                                                                          | Germany         | Annette.Hartmann@med.uni-muenchen.de |
| BPD      | Martin      | Hautzinger   | Department of Clinical and Developmental Psychology; Institute of Psychology; University of Tübingen; Tübingen; Germany.                                                                                                                                                                               | Germany         |                                      |
| MDD      | Andrew C    | Heath        | University of Washington; St Louis                                                                                                                                                                                                                                                                     | USA             | AHeath@wustl.edu                     |
| MDD      | Anjali K    | Henders      | Queensland Institute of Medical Research                                                                                                                                                                                                                                                               | Australia       | anjali.henders@qimr.edu.au           |
| MDD; BPD | Stefan      | Herms        | Dept. of Genomics; Life & Brain Center; University of Bonn; Bonn; Germany                                                                                                                                                                                                                              | Germany         | stefan.herms@uni-bonn.de             |
| MDD      | Ian B       | Hickie       | University of Sydney; Sydney                                                                                                                                                                                                                                                                           | Australia       | ian.hickie@sydney.edu.au             |
| BPD      | Maria       | Hipolito     | Department of Psychiatry and Behavioral Sciences, Howard University College of Medicine, Washington, DC, USA.                                                                                                                                                                                          | USA             |                                      |
| MDD      | Susanne     | Hoefels      | Dept. of Psychiatry; University of Bonn; Bonn; Germany                                                                                                                                                                                                                                                 | Germany         | susanne.hoefels@ukb.uni-bonn.de      |
| BPD, SCZ | Peter A     | Holmans      | Medical Research Council (MRC) Centre for Neuropsychiatric Genetics and Genomics, Henry Wellcome Building, School of Medicine, Cardiff University, Heath Park, Cardiff, UK.; Biostatistics and Bioinformatics Unit, Cardiff University School of Medicine, Cardiff, UK.                                | UK              | holmanspa@cardiff.ac.uk              |
| MDD      | Florian     | Holsboer     | Max Planck Institute of Psychiatry                                                                                                                                                                                                                                                                     | Germany         | holsboer@mpipsykl.mpg.de             |
| MDD      | Jouke Jan   | Hottenga     | VU University; Amsterdam                                                                                                                                                                                                                                                                               | The Netherlands | jj.hottenga@psy.vu.nl;               |
| BPD, SCZ | Christina M | Hultman      | Department of Medical Epidemiology and Biostatistics; Karolinska Institutet; Stockholm; Sweden                                                                                                                                                                                                         | Sweden          | Christina.Hultman@ki.se              |
| SCZ      | Andrés      | Ingason      | Institute of Biological Psychiatry; MHC Sct. Hans; Copenhagen University Hospital; Roskilde; Denmark                                                                                                                                                                                                   | Denmark         | andres.ingason@regionh.dk            |
| MDD      | Marcus      | Ising        | Max Planck Institute of Psychiatry; Munich                                                                                                                                                                                                                                                             | Germany         | ising@atgu.mgh.harvard.edu           |
| BPD      | Stéphane    | Jamain       | INSERM, U955, Psychiatrie Génétique, Créteil, France.; Université Paris Est, Faculté de Médecine, Créteil, France.; Assistance Publique-Hôpitaux de Paris (AP-HP); Hôpital H. Mondor-A. Chenevier; Département de Psychiatrie; Créteil; France.; ENBREC group; Fondation Fondamental; Créteil; France. | France          |                                      |
| BPD      | Edward G    | Jones        | Department of Psychiatry and Behavioral Sciences, Center for Neuroscience, University of California, Davis, California, USA.                                                                                                                                                                           | USA             |                                      |
| BPD, MDD | Lisa        | Jones        | Department of Psychiatry, School of Clinical and Experimental Medicine, Birmingham University, Birmingham, UK.                                                                                                                                                                                         | UK              | l.a.jones@bham.ac.uk                 |
| BPD, MDD | Ian         | Jones        | Medical Research Council (MRC) Centre for Neuropsychiatric Genetics and Genomics, Henry Wellcome Building, School of Medicine, Cardiff University, Heath Park, Cardiff, UK.                                                                                                                            | UK              | JonesIR1@cf.ac.uk                    |
| MDD      | Tzeng       | Jung-Ying    | North Carolina State University                                                                                                                                                                                                                                                                        | USA             | jytzeng@stat.ncsu.edu                |
| SCZ      | Anna        | Kahler, PhD  | Karolinska Institutet                                                                                                                                                                                                                                                                                  | Sweden          | anna.kahler@ki.se                    |
| BPD      | Radhika     | Kandaswamy   | Molecular Psychiatry Laboratory, Mental Health Sciences Unit, University College London, London, UK.                                                                                                                                                                                                   | UK              |                                      |
| SCZ      | Matthew C.  | Keller       | Department of Psychology; University of Colorado; Boulder; Boulder; Colorado; USA                                                                                                                                                                                                                      | USA             | matthew.c.keller@gmail.com           |
| BPD      | John R      | Kelsoe       | Department of Psychiatry, University of California San Diego, La Jolla, California, USA.; Department of Psychiatry; Special Treatment and Evaluation Program (STEP); Veterans Affairs San Diego Healthcare System; San Diego; California; USA.                                                         | USA             |                                      |
| BPD      | James L     | Kennedy      | Psychiatric Neurogenetics Section, Centre for Addiction and Mental Health, Toronto, Ontario, Canada.                                                                                                                                                                                                   | Canada          |                                      |
| SCZ      | Elaine      | Kenny        | Neuropsychiatric Genetics Research Group, Dept of Psychiatry and Institute of Molecular Medicine, Trinity College Dublin, Dublin, Ireland                                                                                                                                                              | Ireland         | kennyel@tcd.ie                       |
| ADHD     | Lindsey     | Kent; MD     | University of St Andrews                                                                                                                                                                                                                                                                               | UK              | lsk8@st-andrews.ac.uk                |
| SCZ      | Yunjung     | Kim          | Department of Genetics; University of North Carolina at Chapel Hill; Chapel Hill; North Carolina; USA                                                                                                                                                                                                  | USA             | yunjungk@email.unc.edu               |
| BPD, SCZ | George K    | Kirov        | MRC Centre for Neuropsychiatric Genetics and Genomics; Department of Psychological Medicine and Neurology; School of Medicine; Cardiff University; Cardiff; Wales; UK                                                                                                                                  | UK              | kirov@cardiff.ac.uk                  |
| MDD      | James A     | Knowles      | University of Southern California                                                                                                                                                                                                                                                                      | USA             | knowles@med.usc.edu                  |
| MDD      | Martin A.   | Kohli        | Max Planck Institute of Psychiatry; Munich                                                                                                                                                                                                                                                             | Germany         | MKohli@med.miami.edu                 |
| BPD      | Daniel L    | Koller       | Department of Medical and Molecular Genetics, Indiana University School of Medicine, Indianapolis, Indiana, USA.                                                                                                                                                                                       | USA             |                                      |
| SCZ      | Bettina     | Konte        | Molecular and Clinical Neurobiology; Department of Psychiatry; Ludwig-Maximilians-University; Munich; Germany                                                                                                                                                                                          | Germany         | Bettina.Konte@med.uni-muenchen.de    |
| MDD      | Ania        | Korszun      | Queen Mary University of London                                                                                                                                                                                                                                                                        | UK              | a.korszun@qmul.ac.uk                 |
| SCZ      | Robert      | Krasucki, MD | University College London                                                                                                                                                                                                                                                                              | UK              | robert@krasucki.freemove.co.uk       |
| ADHD     | Jonna       | Kuntsi PhD   | King's College London, Institute of Psychiatry                                                                                                                                                                                                                                                         | UK              | jonna.kuntsi@kcl.ac.uk               |

|               |             |                |                                                                                                                                                                                                                                                                                                                                                                                                                      |           |                                    |
|---------------|-------------|----------------|----------------------------------------------------------------------------------------------------------------------------------------------------------------------------------------------------------------------------------------------------------------------------------------------------------------------------------------------------------------------------------------------------------------------|-----------|------------------------------------|
| BPD           | Phoenix     | Kwan           | Department of Biostatistics and Center for Statistical Genetics, School of Public Health, University of Michigan, Ann Arbor, Michigan, USA.                                                                                                                                                                                                                                                                          | USA       |                                    |
| BPD           | Mikael      | Landén         | Department of Medical Epidemiology and Biostatistics, Karolinska Institutet, Stockholm, Sweden.; Institute of Neuroscience and Physiology, University of Gothenburg, Gothenburg, Sweden.                                                                                                                                                                                                                             | Sweden    |                                    |
| BPD           | Niklas      | Langstrom      | Institute of Neuroscience and Physiology, University of Gothenburg, Gothenburg, Sweden.                                                                                                                                                                                                                                                                                                                              | Sweden    |                                    |
| BPD           | Mark        | Lathrop        | Centre National de Génotypage; Evry; France.                                                                                                                                                                                                                                                                                                                                                                         | France    |                                    |
| BPD, SCZ      | Jacob       | Lawrence       | Molecular Psychiatry Laboratory; Research Department of Mental Health Sciences; University College London Medical School; Windeyer Institute of Medical Sciences; London; England; UK                                                                                                                                                                                                                                | UK        | jacob.lawrence@nelmht.nhs.uk       |
| BPD, MDD      | William B   | Lawson         | Department of Psychiatry and Behavioral Sciences, Howard University College of Medicine, Washington, DC, USA.                                                                                                                                                                                                                                                                                                        | USA       | wblawson@howard.edu                |
| BPD           | Marion      | Leboyer        | INSERM, U955, Psychiatrie Génétique, Créteil, France.; Université Paris Est, Faculté de Médecine, Créteil, France.; Assistance Publique-Hôpitaux de Paris (AP-HP); Hôpital H. Mondor-A. Chenevier; Département de Psychiatrie; Créteil; France.; ENBREC group; Fondation Fondamental; Créteil; France.                                                                                                               | France    |                                    |
| SCZ           | Todd        | Lencz          | Department of Psychiatry; Division of Research; The Zucker Hillside Hospital Division of the North Shore - Long Island Jewish Health System; Glen Oaks; New York; USA; Center for Psychiatric Neuroscience; The Feinstein Institute for Medical Research; Manhasset; New York; USA; Department of Psychiatry and Behavioral Science; Albert Einstein College of Medicine of Yeshiva University; Bronx; New York; USA | USA       | lencz@lij.edu                      |
| ADHD          | Klaus-Peter | Lesch; MD      | Division of Molecular Psychiatry, ADHD Clinical Research Unit, Department of Psychiatry, Psychosomatics and Psychotherapy, University of Wuerzburg, and Department of Neuroscience, School for Mental Health and Neuroscience (MHENS), Maastricht University, The Netherlands                                                                                                                                        | Germany   | kplesch@mail.uni-wuerzburg.de      |
| MDD           | Cathryn M   | Lewis          | Institute of Psychiatry; King's College London                                                                                                                                                                                                                                                                                                                                                                       | UK        | cathryn.lewis@kcl.ac.uk            |
| BPD           | Jun         | Li             | Department of Human Genetics, University of Michigan, Ann Arbor, Michigan, USA                                                                                                                                                                                                                                                                                                                                       | USA       |                                    |
| BPD           | Paul        | Lichtenstein   | Department of Medical Epidemiology and Biostatistics; Karolinska Institutet; Stockholm; Sweden                                                                                                                                                                                                                                                                                                                       | Sweden    | paul.lichtenstein@ki.se            |
| SCZ           | Jeffrey A   | Lieberman      | Department of Psychiatry; Columbia University; New York; New York; USA                                                                                                                                                                                                                                                                                                                                               | USA       | jlieberman@pi.cpmc.columbia.edu    |
| BPD, MDD, SCZ | Danyu       | Lin            | Department of Biostatistics, University of North Carolina, Chapel Hill, North Carolina, USA.                                                                                                                                                                                                                                                                                                                         | USA       | lin@bios.unc.edu                   |
| BPD           | Chunyu      | Liu            | Department of Psychiatry, University of Chicago, Chicago, Illinois, USA.                                                                                                                                                                                                                                                                                                                                             | USA       |                                    |
| BPD           | Falk W      | Lohoff         | Department of Psychiatry, University of Pennsylvania, Philadelphia, Pennsylvania, USA.                                                                                                                                                                                                                                                                                                                               | USA       | lohoff@mail.med.upenn.edu          |
| ADHD          | Sandra K.   | Loo; Ph.D.     | University of California Los Angeles                                                                                                                                                                                                                                                                                                                                                                                 | USA       | sloo@mednet.ucla.edu               |
| BPD, MDD      | Susanne     | Lucae          | Max Planck Institute of Psychiatry                                                                                                                                                                                                                                                                                                                                                                                   | Germany   | lucael@mpipsykl.mpg.de             |
| MDD           | Donald      | MacIntyre      | University of Edinburgh                                                                                                                                                                                                                                                                                                                                                                                              | UK        | donald.macintyre@lpc.scot.nhs.uk   |
| MDD           | Pamela AF   | Madden         | University of Washington; St Louis                                                                                                                                                                                                                                                                                                                                                                                   | USA       | pmadden@wustl.edu                  |
| SCZ           | Patrik      | Magnusson, PhD | Karolinska Institutet                                                                                                                                                                                                                                                                                                                                                                                                | Sweden    | patrik.magnusson@ki.se             |
| BPD           | Pamela B    | Mahon          | Department of Mental Health, Johns Hopkins University and Hospital, Baltimore, Maryland, USA.                                                                                                                                                                                                                                                                                                                        | USA       |                                    |
| MDD; BPD; SCZ | Wolfgang    | Maier          | Dept. of Psychiatry; University of Bonn; Bonn; Germany                                                                                                                                                                                                                                                                                                                                                               | Germany   | wolfgang.maier@ukb.uni-bonn.de     |
| SCZ           | Anil K      | Malhotra       | Department of Psychiatry; Division of Research; The Zucker Hillside Hospital Division of the North Shore - Long Island Jewish Health System; Glen Oaks; New York; USA; Center for Psychiatric Neuroscience; The Feinstein Institute for Medical Research; Manhasset; New York; USA; Department of Psychiatry and Behavioral Science; Albert Einstein College of Medicine of Yeshiva University; Bronx; New York; USA | USA       | malhotra@lij.edu                   |
| BPD, MDD      | Nicholas G  | Martin         | Queensland Institute of Medical Research, Brisbane, Australia.                                                                                                                                                                                                                                                                                                                                                       | Australia | nick.martin@qimr.edu.au            |
| MDD; BPD; SCZ | Manuel      | Mattheisen     | (1) Dept. of Genomics; Life & Brain Center; University of Bonn; Bonn; Germany; (2) Department of Biostatistics; Harvard School of Public Health; Boston; MA; USA; (3) Institute for Genomic Mathematics; University of Bonn; Bonn; Germany                                                                                                                                                                           | Germany   | mmattheisen@uni-bonn.de            |
| BPD           | Keith       | Matthews       | Division of Neuroscience, Medical Research Institute, University of Dundee, Ninewells Hospital & Medical School, Dundee, UK.                                                                                                                                                                                                                                                                                         | UK        |                                    |
| BPD, SCZ      | Morten      | Mattingsdal    | KG Jebsen Centre for Psychosis Research, Institute of Clinical Medicine, University of Oslo, Oslo, Norway.; Sorlandet Hospital HF, Kristiansand, Norway.                                                                                                                                                                                                                                                             | Norway    | morten.mattingsdal@gmail.com       |
| SCZ           | Steve       | McCarroll, PhD | Harvard/Broad Institute                                                                                                                                                                                                                                                                                                                                                                                              | USA       | mccarroll@genetics.med.harvard.edu |
| BPD           | Kevin A     | McGhee         | Division of Psychiatry; University of Edinburgh; Royal Edinburgh Hospital; Edinburgh; Scotland; UK                                                                                                                                                                                                                                                                                                                   | UK        | kmcghee@ed.ac.uk                   |
| ADHD          | James J.    | McGough        | University of California, Los Angeles, CA                                                                                                                                                                                                                                                                                                                                                                            | USA       | jmcgough@mednet.ucla.edu           |
| MDD           | Patrick J   | McGrath        | Columbia University; NYSPI                                                                                                                                                                                                                                                                                                                                                                                           | USA       | mcgrath@nyspi.columbia.edu         |
| BPD, MDD      | Peter       | McGuffin       | Social, Genetic and Developmental Psychiatry (SGDP) Centre, The Institute of Psychiatry, King's College London, De Crespigny Park Denmark Hill, London, UK.                                                                                                                                                                                                                                                          | UK        | peter.mcguffin@kcl.ac.uk           |
| BPD           | Melvin G    | McInnis        | Department of Psychiatry, University of Michigan, Ann Arbor, Michigan, USA.                                                                                                                                                                                                                                                                                                                                          | USA       |                                    |
| BPD, MDD, SCZ | Andrew      | McIntosh       | Division of Psychiatry, University of Edinburgh, Royal Edinburgh Hospital, Edinburgh, UK.; Medical Genetics Section, University of Edinburgh Molecular Medicine Centre, Western General Hospital, Edinburgh, UK.                                                                                                                                                                                                     | UK        | andrew.mcintosh@ed.ac.uk           |
| BPD           | Rebecca     | McKinney       | Neurosciences Centre of Excellence in Drug Discovery, GlaxoSmithKline Research and Development, Verona, Italy.                                                                                                                                                                                                                                                                                                       | Italy     |                                    |

|                                  |             |               |                                                                                                                                                                                                                                                                         |                 |                               |
|----------------------------------|-------------|---------------|-------------------------------------------------------------------------------------------------------------------------------------------------------------------------------------------------------------------------------------------------------------------------|-----------------|-------------------------------|
| BPD, MDD                         | Alan W      | McLean        | Division of Psychiatry, University of Edinburgh, Royal Edinburgh Hospital, Edinburgh, UK.; Medical Genetics Section, University of Edinburgh Molecular Medicine Centre, Western General Hospital, Edinburgh, UK.                                                        | UK              | a.w.maclea@ed.ac.uk           |
| BPD                              | Francis J   | McMahon       | National Institute of Mental Health, US National Institutes of Health, Bethesda, Maryland, USA.                                                                                                                                                                         | USA             |                               |
| BPD, SCZ                         | Andrew      | McQuillin     | Molecular Psychiatry Laboratory; Research Department of Mental Health Sciences; University College London Medical School; Windeyer Institute of Medical Sciences; London; England; UK                                                                                   | UK              | a.mcquillin@ucl.ac.uk         |
| SCZ                              | Helena      | Medeiros, MSW | Keck School of Medicine, University of Southern California, Los Angeles, California, USA                                                                                                                                                                                | USA             | helena.medeiros@keck.usc.edu  |
| Analysis                         | Sarah E.    | Medland       | Queensland Institute of Medical Research, Brisbane                                                                                                                                                                                                                      | Australia       | medlandse@gmail.com           |
| BPD                              | Sandra      | Meier         | Department of Genetic Epidemiology in Psychiatry, Central Institute of Mental Health Mannheim, University of Heidelberg, Mannheim, Germany.                                                                                                                             | Germany         |                               |
| BPD, SCZ                         | Ingrid      | Melle         | KG Jebsen Centre for Psychosis Research; Institute of Clinical Medicine; University of Oslo; Division of Mental Health and Addiction, Oslo University Hospital, Oslo, Norway                                                                                            | Norway          | ingrid.melle@medisin.uio.no   |
| BPD                              | Fan         | Meng          | Molecular and Behavioral Neuroscience Institute, University of Michigan, Ann Arbor, Michigan, USA.                                                                                                                                                                      | USA             |                               |
| MDD                              | Christel M  | Middeldorp    | VU University; Amsterdam                                                                                                                                                                                                                                                | The Netherlands | cm.middeldorp@psy.vu.nl       |
| MDD                              | Lefkos      | Middleton     | Imperial College                                                                                                                                                                                                                                                        | UK              | l.middleton@imperial.ac.uk    |
| SCZ                              | Vihra       | Milanova      | Department of Psychiatry; First Psychiatric Clinic; Alexander University Hospital; Sofia; Bulgaria                                                                                                                                                                      | Bulgaria        | vihmil@yahoo.com              |
| BPD                              | Philip B    | Mitchell      | School of Psychiatry; University of New South Wales and Black Dog Institute; Sydney; New South Wales; Australia.                                                                                                                                                        | Australia       |                               |
| BPD, MDD                         | Grant W     | Montgomery    | Queensland Institute of Medical Research, Brisbane, Australia.                                                                                                                                                                                                          | Australia       | grant.montgomery@qimr.edu.au  |
| BPD                              | Jennifer    | Moran         | Stanley Center for Psychiatric Research, Broad Institute of MIT and Harvard, Cambridge, Massachusetts, USA.                                                                                                                                                             | USA             | jmoran@broadinstitute.org     |
| BPD                              | Gunnar      | Morken        | Department of Psychiatry, St. Olavs Hospital, Trondheim, Norway.; Department of Neuroscience, Norwegian University of Science and Technology, Trondheim, Norway.                                                                                                        | Norway          | gunnar.morken@ntnu.no         |
| BPD, SCZ                         | Derek W     | Morris        | Neuropsychiatric Genetics Research Group; Department of Psychiatry and Institute of Molecular Medicine; Trinity College Dublin; Dublin; Ireland                                                                                                                         | Ireland         | morrisdw@tcd.ie               |
| BPD, SCZ                         | Valentina   | Moskvina      | Medical Research Council (MRC) Centre for Neuropsychiatric Genetics and Genomics, Henry Wellcome Building, School of Medicine, Cardiff University, Heath Park, Cardiff, UK.; Biostatistics and Bioinformatics Unit, Cardiff University School of Medicine, Cardiff, UK. | UK              |                               |
| SCZ                              | Bryan J     | Mowry         | Queensland Brain Institute and Queensland Centre for Mental Health Research; University of Queensland; Brisbane; Queensland; Australia                                                                                                                                  | Australia       | b.mowry@uq.edu.au             |
| BPD, MDD                         | Pierandrea  | Muglia        | Neurosciences Centre of Excellence in Drug Discovery, GlaxoSmithKline Research and Development, Verona, Italy.                                                                                                                                                          | Italy           | pierandrea.muglia@utoronto.ca |
| BPD                              | Thomas W    | Mühleisen     | Institute of Human Genetics, University of Bonn, Bonn, Germany.; German Center for Neurodegenerative Disorders (DZNE), Bonn, Germany.                                                                                                                                   | Germany         |                               |
| BPD                              | Walter J    | Muir          | Division of Psychiatry, University of Edinburgh, Royal Edinburgh Hospital, Edinburgh, UK.; Medical Genetics Section, University of Edinburgh Molecular Medicine Centre, Western General Hospital, Edinburgh, UK.                                                        | UK              |                               |
| BPD, MDD                         | Bertram     | Müller-Myhsok | Max Planck Institute of Psychiatry; Munich                                                                                                                                                                                                                              | Germany         | bmm@mpipsykl.mpg.de           |
| BPD                              | Richard M   | Myers         | HudsonAlpha Institute for Biotechnology, Huntsville, Alabama, USA.                                                                                                                                                                                                      | USA             |                               |
| ADHD                             | Stan F.     | Nelson        | University of California Los Angeles                                                                                                                                                                                                                                    | USA             | snelson@ucla.edu              |
| BPD                              | Caroline M  | Nievergelt    | Neurosciences Centre of Excellence in Drug Discovery, GlaxoSmithKline Research and Development, Verona, Italy.                                                                                                                                                          | Italy           |                               |
| BPD                              | Ivan        | Nikolov       | MRC Centre for Neuropsychiatric Genetics and Genomics; Department of Psychological Medicine and Neurology; School of Medicine; Cardiff University; Cardiff; Wales; UK                                                                                                   | UK              | ivan.nikolov@mac.com          |
| BPD                              | Vishwajit   | Nimgaonkar    | Department of Human Genetics, University of Pittsburgh, Pittsburgh, Pennsylvania, USA.                                                                                                                                                                                  |                 |                               |
| MDD                              | Willem A    | Nolen         | Groningen University Medical Center; Groningen                                                                                                                                                                                                                          | The Netherlands | w.a.nolen@psy.umcg.nl         |
| MDD; BPD; SCZ                    | Markus M    | Nöthen        | (1) Dept. of Genomics; Life & Brain Center; University of Bonn; Bonn; (2) Institute of Human Genetics; University of Bonn; Bonn; Germany; (3) German Center for Neurodegenerative Disorders (DZNE); Bonn; Germany                                                       | Germany         | markus.noethen@uni-bonn.de    |
| BPD                              | Evaristus A | Nwulia        | Department of Psychiatry and Behavioral Sciences, Howard University College of Medicine, Washington, DC, USA.                                                                                                                                                           | USA             |                               |
| MDD                              | Dale R      | Nyholt        | Queensland Institute of Medical Research                                                                                                                                                                                                                                | Australia       | dale.nyholt@qimr.edu.au       |
| BPD, SCZ, Coordinating Committee | Michael C   | O'Donovan     | MRC Centre for Neuropsychiatric Genetics and Genomics; Department of Psychological Medicine and Neurology; School of Medicine; Cardiff University; Cardiff; Wales; UK                                                                                                   | UK              | odonovanmc@cardiff.ac.uk      |
| BPD, SCZ                         | Colm        | O'Dushlaine   | Stanley Center for Psychiatric Research, Broad Institute of MIT and Harvard, Cambridge, Massachusetts, USA.                                                                                                                                                             | USA             | odushlain@tcd.ie              |
| ADHD                             | Robert D.   | Oades; PhD    | University of Duisburg-Essen                                                                                                                                                                                                                                            | Germany         | robert.oades@uni-due.de       |
| SCZ                              | Ann         | Olincy        | Department of Psychiatry; University of Colorado Denver; Aurora; Colorado; USA                                                                                                                                                                                          | USA             | Ann.Olincy@ucdenver.edu       |
| SCZ                              | Line        | Olsen         | Institute of Biological Psychiatry; MHC Sct. Hans; Copenhagen University Hospital; Roskilde; Denmark                                                                                                                                                                    | Denmark         | line.olsen@regionh.dk         |

|           |            |                    |                                                                                                                                                                                                                                                                                                                                 |                      |                                  |
|-----------|------------|--------------------|---------------------------------------------------------------------------------------------------------------------------------------------------------------------------------------------------------------------------------------------------------------------------------------------------------------------------------|----------------------|----------------------------------|
| SCZ       | Roel A     | Ophoff             | Department of Medical Genetics and Rudolf Magnus Institute of Neuroscience; University Medical Center Utrecht; Utrecht; The Netherlands; UCLA Center for Neurobehavioral Genetics; University of California at Los Angeles; Department of Human Genetics; University of California at Los Angeles; Los Angeles; California; USA | The Netherlands; USA | ROphoff@mednet.ucla.edu          |
| BPD       | Urban      | Osby               | Department of Molecular Medicine, Karolinska Institutet, Stockholm, Sweden.                                                                                                                                                                                                                                                     | Sweden               |                                  |
| BPD       | Högni      | Óskarsson          | Therapeia; Reykjavik; Iceland.                                                                                                                                                                                                                                                                                                  | Iceland              |                                  |
| BPD, SCZ  | Michael J  | Owen               | MRC Centre for Neuropsychiatric Genetics and Genomics; Department of Psychological Medicine and Neurology; School of Medicine; Cardiff University; Cardiff; Wales; UK                                                                                                                                                           | UK                   | owenmj@cardiff.ac.uk             |
| ASD       | Aarno      | Palotie; MD; PhD   | Sanger Institute                                                                                                                                                                                                                                                                                                                | UK                   | ap8@SANGER.AC.UK                 |
| SCZ       | Michele T  | Pato               | Keck School of Medicine; University of Southern California; Los Angeles; California; USA                                                                                                                                                                                                                                        | USA                  | mpato@usc.edu                    |
| SCZ       | Carlos N   | Pato               | Keck School of Medicine; University of Southern California; Los Angeles; California; USA                                                                                                                                                                                                                                        | USA                  | pato@usc.edu                     |
| MDD; CDG  | Brenda P   | Penninx            | VU University Medical Center; Amsterdam                                                                                                                                                                                                                                                                                         | The Netherlands      | b.penninx@vumc.nl;               |
| MDD       | Michele L  | Pergadia           | University of Washington; St Louis                                                                                                                                                                                                                                                                                              | USA                  | michelep@wustl.edu               |
| BPD       | Hannes     | Petursson          | Department of Psychiatry; National University Hospital; Reykjavik; Iceland                                                                                                                                                                                                                                                      | Iceland              | hannesp@lsh.is                   |
| BPD, SCZ  | Benjamin S | Pickard            | Division of Psychiatry, University of Edinburgh, Royal Edinburgh Hospital, Edinburgh, UK.; Medical Genetics Section, University of Edinburgh Molecular Medicine Centre, Western General Hospital, Edinburgh, UK.                                                                                                                | UK                   | benjamin.pickard@strath.ac.uk    |
| SCZ       | Jonathan   | Pimm, MD           | University College London                                                                                                                                                                                                                                                                                                       | UK                   | Jonathan.Pimm@eastlondon.nhs.uk  |
| ASD       | Joseph     | Piven; MD          | University of North Carolina                                                                                                                                                                                                                                                                                                    | USA                  | jpiven@MED.UNC.EDU               |
| BPD       | Porgeir    | Porgeirsson        | deCODE Genetics, Sturlugata 8 101 Reykjavik, Iceland.                                                                                                                                                                                                                                                                           | Iceland              |                                  |
| SCZ       | Danielle   | Posthuma           | VU University; Center for Neurogenomics and Cognitive Research (CNCR); Department of Functional Genomics; VU Medical Centre; Department of Medical Genomics; Amsterdam; The Netherlands                                                                                                                                         | The Netherlands      | danielle.posthuma@cncr.vu.nl     |
| BPD, MDD  | James B    | Potash             | University of Iowa                                                                                                                                                                                                                                                                                                              | USA                  | james-potash@uiowa.edu           |
| BPD       | Peter      | Propping           | Institute of Human Genetics, University of Bonn, Bonn, Germany.                                                                                                                                                                                                                                                                 | Germany              |                                  |
| SCZ       | Vinay      | Puri, PhD          | University College London                                                                                                                                                                                                                                                                                                       | UK                   | puri.vinay@gmail.com             |
| SCZ       | Digby      | Quested, MD        | University of Oxford                                                                                                                                                                                                                                                                                                            | UK                   | digby.quested@psych.ox.ac.uk     |
| BPD       | Emma M     | Quinn              | Neuropsychiatric Genetics Research Group; Department of Psychiatry and Institute of Molecular Medicine; Trinity College Dublin; Dublin; Ireland                                                                                                                                                                                 | Ireland              | quinne5@tcd.ie                   |
| SCZ       | Henrik B.  | Rasmussen, DVM PhD | Institute of Biological Psychiatry, Sct. Hans Mental Health Center (MHS); Department of Clinical Medicine, University of Copenhagen; The Lundbeck Initiative for Integrative Psychiatric Research, iPSYCH; Denmark                                                                                                              | DK                   | henrik.berg.rasmussen@regionh.dk |
| BPD       | Soumya     | Raychaudhuri       | Analytic and Translational Genetics Unit, Massachusetts General Hospital and Harvard Medical School, Boston, Massachusetts, USA.; Stanley Center for Psychiatric Research, Broad Institute of MIT and Harvard, Cambridge, Massachusetts, USA.                                                                                   | USA                  |                                  |
| ASD       | Karola     | Rehnström; PhD     | Sanger Institute                                                                                                                                                                                                                                                                                                                | UK                   | kr7@SANGER.AC.UK                 |
| ADHD, BPD | Andreas    | Reif               | Department of Psychiatry; Psychosomatics and Psychotherapy; University of Wuerzburg                                                                                                                                                                                                                                             | Germany              | reif_a@klinik.uni-wuerzburg.de   |
| BPD       | John       | Rice               | Washington University School of Medicine, St. Louis, Missouri, USA.                                                                                                                                                                                                                                                             | USA                  |                                  |
| SCZ       | Lizzy      | Rossin             |                                                                                                                                                                                                                                                                                                                                 |                      |                                  |
| ADHD      | Aribert    | Rothenberger, MD   | University Medicine Goettingen/Child and Adolescent Psychiatry                                                                                                                                                                                                                                                                  | Germany              | arothern@gwdg.de                 |
| ASD       | Guy        | Rouleau; MD; PhD   | University of Montreal                                                                                                                                                                                                                                                                                                          | Canada               | guy.rouleau@UMONTREAL.CA         |
| BPD, SCZ  | Douglas    | Ruderfer           | Division of Psychiatric Genomics, Department of Psychiatry, Mount Sinai School of Medicine, New York, New York, USA.                                                                                                                                                                                                            | USA                  |                                  |
| SCZ       | Dan        | Rujescu            | Molecular and Clinical Neurobiology; Department of Psychiatry; Ludwig-Maximilians-University; Munich; Germany                                                                                                                                                                                                                   | Germany              | Dan.Rujescu@med.uni-muenchen.de  |
| SCZ       | Alan R     | Sanders            | Department of Psychiatry and Behavioral Sciences; NorthShore University HealthSystem and University of Chicago; Evanston; Illinois; USA                                                                                                                                                                                         | USA                  | asanders@northshore.org          |
| BPD       | Martin     | Schalling          | Department of Molecular Medicine, Karolinska Institutet, Stockholm, Sweden.                                                                                                                                                                                                                                                     | Sweden               |                                  |
| BPD       | Alan F     | Schatzberg         | Psychiatry and Behavioral Science, Stanford University School of Medicine, Palo Alto, California, USA.                                                                                                                                                                                                                          | USA                  |                                  |
| BPD, MDD  | William A  | Scheftner          | Rush University Medical Center                                                                                                                                                                                                                                                                                                  | USA                  | william_a_scheftner@rush.edu     |
| ASD       | Gerard     | Schellenberg; PhD  | Perelman School of Medicine; University of Pennsylvania                                                                                                                                                                                                                                                                         | USA                  | gerardsc@MAIL.MED.UPENN.EDU      |
| BPD       | Peter R    | Schofield          | Prince of Wales Medical Institute; Sydney; Australia.; University of New South Wales; Sydney; Australia.                                                                                                                                                                                                                        | Australia            |                                  |
| BPD       | Nicholas J | Schork             | The Scripps Translational Science Institute and The Scripps Research Institute, La Jolla, California, USA.                                                                                                                                                                                                                      | USA                  |                                  |
| BPD       | Johannes   | Schumacher         | Institute of Human Genetics, University of Bonn, Bonn, Germany.                                                                                                                                                                                                                                                                 | Germany              |                                  |
| BPD       | Markus M   | Schwarz            | Psychiatric Center Nordbaden; Wiesloch; Germany.                                                                                                                                                                                                                                                                                | Germany              |                                  |
| BPD       | Edward     | Scolnick           | Stanley Center for Psychiatric Research, Broad Institute of MIT and Harvard, Cambridge, Massachusetts, USA.                                                                                                                                                                                                                     | USA                  | scolnick@broadinstitute.org      |
| BPD       | Laura J    | Scott              | Department of Biostatistics and Center for Statistical Genetics, School of Public Health, University of Michigan, Ann Arbor, Michigan, USA.                                                                                                                                                                                     | USA                  |                                  |
| MDD       | Jianxin    | Shi                | National Cancer Institute                                                                                                                                                                                                                                                                                                       | USA                  | jianxin.shi@nih.gov              |
| SCZ       | Jianxin    | Shi                | Division of Cancer Epidemiology and Genetics; National Cancer Institute; Bethesda; Maryland; USA                                                                                                                                                                                                                                | USA                  | jianxins@gmail.com               |
| BPD       | Paul D     | Shilling           | Neurosciences Centre of Excellence in Drug Discovery, GlaxoSmithKline Research and Development, Verona, Italy.                                                                                                                                                                                                                  | Italy                |                                  |
| MDD       | Stanley I  | Shyn               | University of Washington                                                                                                                                                                                                                                                                                                        | USA                  | stanshyn@uw.edu                  |

|          |                |                            |                                                                                                                                                                                                                                     |                 |                                           |
|----------|----------------|----------------------------|-------------------------------------------------------------------------------------------------------------------------------------------------------------------------------------------------------------------------------------|-----------------|-------------------------------------------|
| BPD      | Engilbert      | Sigurðsson                 | Department of Psychiatry; National University Hospital; Department of Psychiatry; University of Iceland; Reykjavik; Iceland                                                                                                         | Iceland         | engilbs@landspitali.is                    |
| SCZ      | Jeremy M.      | Silverman, PhD             | Mount Sinai School of Medicine / Bronx Veterans Affairs Medical Center                                                                                                                                                              | USA             | jeremy.silverman@mssm.edu                 |
| BPD, SCZ | Pamela         | Sklar                      | Division of Psychiatric Genomics, Department of Psychiatry, Mount Sinai School of Medicine, New York, New York, USA.                                                                                                                | USA             |                                           |
| MDD      | Susan L        | Slager                     | Mayo Clinic                                                                                                                                                                                                                         | USA             | slager.susan@mayo.edu                     |
| ADHD     | Susan L.       | Smalley; Ph.D.             | University of California Los Angeles                                                                                                                                                                                                | USA             | sue@suesmalley.com                        |
| MDD      | Johannes H     | Smit                       | VU University Medical Center; Amsterdam                                                                                                                                                                                             | The Netherlands | jh.smit@ggzingeest.nl                     |
| BPD      | Erin N         | Smith                      | The Scripps Translational Science Institute and Scripps Health, La Jolla, California, USA.                                                                                                                                          | USA             |                                           |
| ADHD     | Edmund         | Sonuga-Barke PhD           | Developmental Brain & Behaviour Laboratory, Psychology University of Southampton; Department of Experimental Clinical & Health Psychology, Ghent University                                                                         | UK              | ejb3@soton.ac.uk                          |
| BPD, SCZ | David          | St. Clair                  | Institute of Medical Sciences; University of Aberdeen; Foresterhill; Aberdeen; Scotland; UK                                                                                                                                         | UK              | d.stclair@abdn.ac.uk                      |
| ASD      | Matthew        | State; MD; PhD             | Yale University                                                                                                                                                                                                                     | USA             | matthew.state@YALE.EDU                    |
| BPD      | Kari           | Stefansson                 | deCODE Genetics, Sturlugata 8 101 Reykjavik, Iceland.                                                                                                                                                                               | Iceland         |                                           |
| BPD      | Hreinn         | Stefansson                 | deCODE genetics; Reykjavik; Iceland                                                                                                                                                                                                 | Iceland         | hreinn@decode.is                          |
| MDD; BPD | Michael        | Steffens                   | Institute of Medical Biometry; Informatics and Epidemiology (IMBIE); University of Bonn; Bonn; Germany                                                                                                                              | Germany         | michael.steffens@imbie.meb.uni-bonn.de    |
| BPD      | Stacy          | Steinberg                  | deCODE genetics; Reykjavik; Iceland                                                                                                                                                                                                 | Iceland         | stacy.steinberg@decode.is                 |
| ADHD     | Hans-Christoph | Steinhausen; MD; PhD; DMSc | REGION NORDJYLLAND, Aalborg University Hospital                                                                                                                                                                                     | Denmark         | www.psykiatri.rn.dk                       |
| BPD      | John           | Strauss                    | Social, Genetic and Developmental Psychiatry (SGDP) Centre, The Institute of Psychiatry, King's College London, De Crespigny Park Denmark Hill, London, UK.                                                                         | UK              |                                           |
| BPD      | Jana           | Strohmaier                 | Department of Genetic Epidemiology in Psychiatry, Central Institute of Mental Health Mannheim, University of Heidelberg, Mannheim, Germany.                                                                                         | Germany         |                                           |
| SCZ      | T Scott        | Stroup                     | Department of Psychiatry; Columbia University; New York; New York; USA                                                                                                                                                              | USA             | stroups@pi.cpmc.columbia.edu              |
| ASD      | James          | Sutcliffe; PhD             | Vanderbilt University                                                                                                                                                                                                               | USA             | jim.sutcliffe@VANDERBILT.EDU              |
| ASD      | Peter          | Szatmari; MD               | McMaster University                                                                                                                                                                                                                 | Canada          | szatmar@MCMASTER.CA                       |
| BPD      | Szabocls       | Szelinger                  | The Translational Genomics Research Institute, Phoenix, Arizona, USA.                                                                                                                                                               | USA             |                                           |
| SCZ      | Srinivasa      | Thirumalai, MD             | West Berkshire NHS Trust/University College London                                                                                                                                                                                  | UK              | docthiru@hotmail.com                      |
| BPD      | Robert C       | Thompson                   | Molecular and Behavioral Neuroscience Institute, University of Michigan, Ann Arbor, Michigan, USA.                                                                                                                                  | USA             |                                           |
| BPD, MDD | Federica       | Tozzi                      | GlaxoSmithKline                                                                                                                                                                                                                     | Italy           | federica.tozzi1@tin.it                    |
| MDD; BPD | Jens           | Treutlein                  | Department of Genetic Epidemiology in Psychiatry; Central Institute of Mental Health; University of Heidelberg; Mannheim; Germany                                                                                                   | Germany         | jens.treutlein@zi-mannheim.de             |
| MDD      | Manfred        | Uhr                        | Max Planck Institute of Psychiatry; Munich                                                                                                                                                                                          | Germany         | uhr@mpipsykl.mpg.de                       |
| MDD      | Edwin JCG      | van den Oord               | Virginia Commonwealth University                                                                                                                                                                                                    | USA             | ejvandenoord@vcu.edu                      |
| MDD      | Gerard         | Van Grootheest             | VU University Medical Center; Amsterdam                                                                                                                                                                                             | The Netherlands | g.vangrootheest@ggzingeest.nl             |
| ASD      | Veronica       | Vieland; PhD               | Nationwide Children's Hospital                                                                                                                                                                                                      | USA             | veronica.vieland@NATIONWIDECCHILDRENS.ORG |
| BPD      | John B         | Vincent                    | Molecular Neuropsychiatry and Development Laboratory, Centre for Addiction and Mental Health, Toronto, Ontario, Canada.                                                                                                             | Canada          |                                           |
| SCZ      | Peter M.       | Visscher                   | The University of Queensland, Queensland Brain Institute & UnivDiamantina Institute, Brisbane, Australia                                                                                                                            | Australia       | peter.visscher@uq.edu.au                  |
| BPD      | Stanley J      | Watson                     | Molecular and Behavioral Neuroscience Institute, University of Michigan, Ann Arbor, Michigan, USA.                                                                                                                                  | USA             |                                           |
| MDD      | Myrna M        | Weissman                   | Columbia University                                                                                                                                                                                                                 | USA             | mmw3@columbia.edu                         |
| SCZ      | Thomas         | Werge                      | Institute of Biological Psychiatry; MHC Sct. Hans; Copenhagen University Hospital; Roskilde; Denmark                                                                                                                                | Denmark         | thomas.werge@regionh.dk                   |
| BPD      | Thomas F       | Wienker                    | Institute for Medical Biometry, Informatics and Epidemiology, University of Bonn, Bonn, Germany.                                                                                                                                    | Germany         |                                           |
| MDD      | Gonneke        | Willemsen                  | VU University                                                                                                                                                                                                                       | The Netherlands | ahm.willemsen@psy.vu.nl                   |
| BPD      | Richard        | Williamson                 | Social, Genetic and Developmental Psychiatry (SGDP) Centre, The Institute of Psychiatry, King's College London, De Crespigny Park Denmark Hill, London, UK.                                                                         | UK              |                                           |
| BPD      | Stephanie H    | Witt                       | Department of Genetic Epidemiology in Psychiatry, Central Institute of Mental Health Mannheim, University of Heidelberg, Mannheim, Germany.                                                                                         | Germany         |                                           |
| MDD      | Naomi R        | Wray                       | The University of Queensland, Queensland Brain Institute, Brisbane, Australia                                                                                                                                                       | Australia       | naomi.wray@uq.edu.au                      |
| BPD      | Adam           | Wright                     | School of Psychiatry; University of New South Wales and Black Dog Institute; Sydney; New South Wales; Australia.                                                                                                                    | Australia       |                                           |
| BPD      | Wei            | Xu                         | Dalla Lana School of Public Health, University of Toronto, Toronto, Canada.                                                                                                                                                         | Canada          |                                           |
| BPD      | Allan H        | Young                      | Division of Neuroscience, Medical Research Institute, University of Dundee, Ninewells Hospital & Medical School, Dundee, UK.; University of British Columbia (UBC) Institute of Mental Health, Vancouver, British Columbia, Canada. | UK: Canada      |                                           |
| SCZ      | Stan           | Zammit                     | MRC Centre for Neuropsychiatric Genetics and Genomics; Department of Psychological Medicine and Neurology; School of Medicine; Cardiff University; Cardiff; Wales; UK                                                               | UK              | zammits@cardiff.ac.uk                     |
| BPD      | Peter P        | Zandi                      | Department of Mental Health, Johns Hopkins University and Hospital, Baltimore, Maryland, USA.                                                                                                                                       | USA             |                                           |

|               |           |               |                                                                                                                                                                                                                             |                 |                         |
|---------------|-----------|---------------|-----------------------------------------------------------------------------------------------------------------------------------------------------------------------------------------------------------------------------|-----------------|-------------------------|
| BPD           | Peng      | Zhang         | Department of Biostatistics and Center for Statistical Genetics, School of Public Health, University of Michigan, Ann Arbor, Michigan, USA.;<br>Department of Psychiatry, University of Michigan, Ann Arbor, Michigan, USA. | USA             |                         |
| MDD           | Frans G   | Zitman        | Leiden University Medical Center; Leiden                                                                                                                                                                                    | The Netherlands | f.g.zitman@lumc.nl      |
| BPD           | Sebastian | Zöllner       | Department of Biostatistics and Center for Statistical Genetics, School of Public Health, University of Michigan, Ann Arbor, Michigan, USA.;<br>Department of Psychiatry, University of Michigan, Ann Arbor, Michigan, USA. | USA             |                         |
| CDG; BPD; SCZ | Nicholas  | Craddock; MD# | Cardiff University School of Medicine                                                                                                                                                                                       | UK              | craddockn@Cardiff.ac.uk |
| CDG; SCZ      | Kenneth   | Kendler; MD#  | Virginia Institute for Psychiatric and Behavioral Genetics; Departments of Psychiatry and Human and Molecular Genetics; Virginia Commonwealth University School of Medicine; Richmond; Virginia; USA                        | USA             | kendler@vcu.edu         |

\* these individuals contributed equally

#these individuals contributed equally
